# Supplementary material
Source: bioRxiv or medRxiv preprint supplement (https://www.biorxiv.org/highwire/filestream/133865/field_highwire_adjunct_files/0/444109-1.pdf)
Supplement: Supplementary file [file 444109-1.pdf]

## Supplementary Figures and Tables

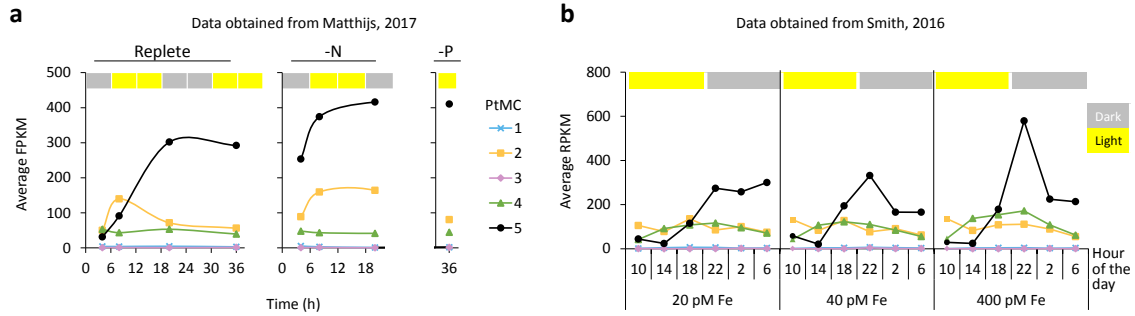

**Supplementary Fig. 1** *P. tricornutum* MCs expression in published transcriptomes.

**a** *P. tricornutum* MCs expression, presented in fragments per kilobase of exon per million fragments mapped (FPKM) as obtained from Matthijs *et al.*<sup>1</sup> during 36 h growth in replete, nitrogen or phosphate deplete media. **b** *P. tricornutum* MCs expression, presented in reads per kilobase of transcript per million (RPKM) values as obtained from Smith *et al.*<sup>2</sup> after 30 generation acclimation to 20, 40 or 400 pM Fe, during 20 h growth diel cycle. Light regime is indicated in yellow (light) or gray (dark).

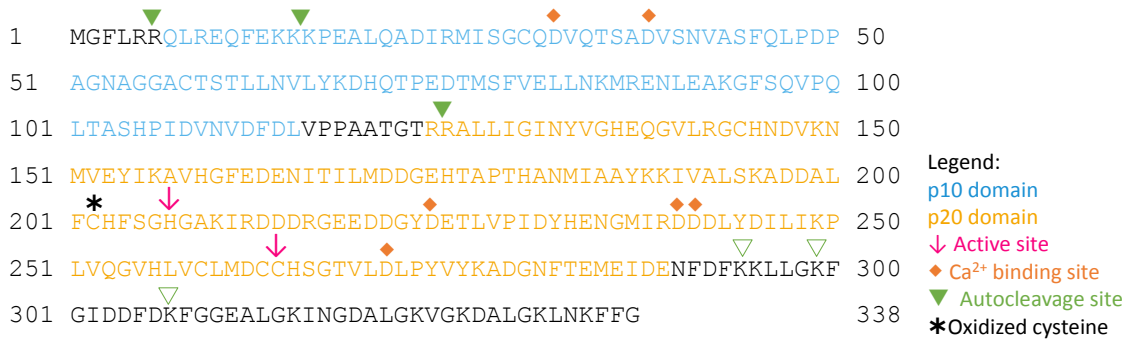

**Supplementary Fig. 2** PtMC5 protein sequence and conserved features.

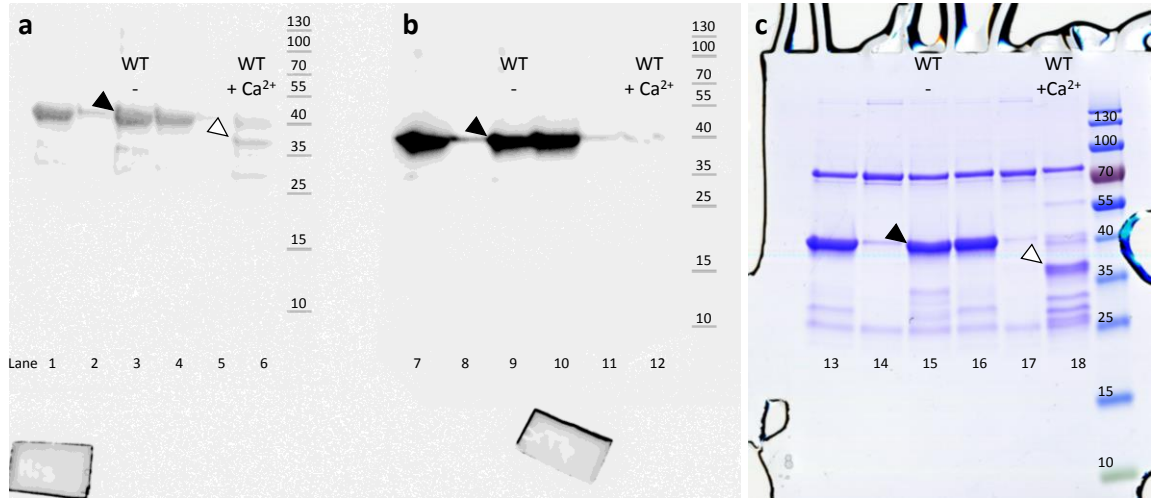

**Supplementary Fig. 3** Full membranes and gels used to reconstruct Figure 2b. Immunoblot with (HRP)  $\alpha$ His (a) or  $\alpha$ T7 (b) tags, and Coomassie stained SDS-page (c). About 2.5  $\mu$ g protein extracts per lane were incubated with activity buffer containing 10 mM DTT, 0.1% CHAPS and without / with 10 mM  $\text{CaCl}_2$  for 30 min prior to gel loading. Full length PtMC5 (~40 kD), auto-cleaved PtMC5 (~37 kD) were detected. Lanes 1, 2, 4, 5, 7, 8, 10, 11, 13, 14, 16 and 17 are not discussed in this manuscript. Protein ladders are present in the right, size in kD.

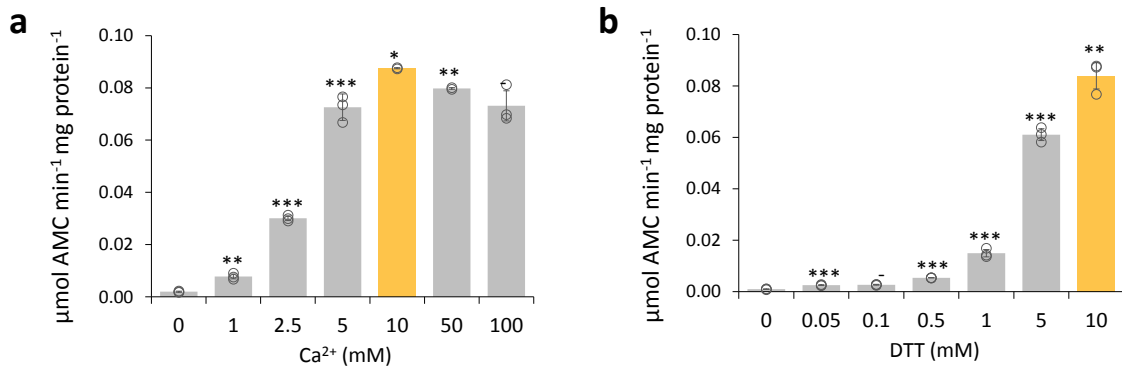

**Supplementary Fig. 4** PtMC5 *in vitro* activity require high concentrations of  $\text{Ca}^{2+}$  and DDT. Recombinant PtMC5 protease activity, measured as release of AMC from GGR-AMC in increasing concentrations of  $\text{Ca}^{2+}$  (a) or DTT (b). In orange marked 10 mM ( $\text{Ca}^{2+}$  or DTT), as this concentration was used in the rest of the manuscript. Standard curve was used to convert the relative fluorescence units into  $\mu$ mole of free AMC released per min per mg of total protein. Single measurements are indicated in circles, bars are means  $\pm$  s.d. of triplicates, each concentration was compared to 1 lower concentration,  $-P > 0.05$ ,  $*P < 0.05$ ,  $**P < 0.005$ ,  $***P < 0.001$ .

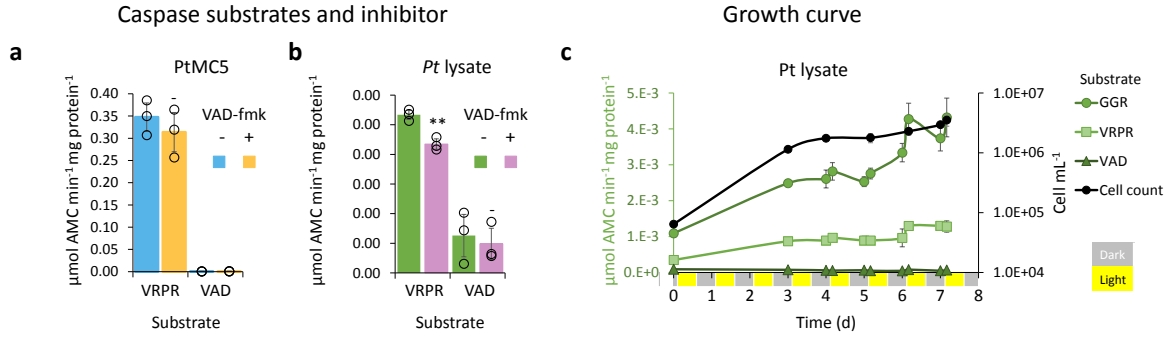

**Supplementary Fig. 5** PtMC5 and *P. tricornutum* protease activity in response to caspase inhibitor and during a growth curve. Recombinant PtMC5 (a), *P. tricornutum* protein extract (b), protease activity measured as release of AMC from peptidyl substrates, with or without 100  $\mu\text{M}$  of the pan-caspase inhibitor VAD-fmk. Standard curve was used to convert the relative fluorescence units into  $\mu\text{mole}$  of free AMC released per min per mg of total protein. Single measurements are indicated in circles, bars are means  $\pm$  s.d. of triplicates, significant relative to no inhibitor,  $-P>0.05$ ,  $**P=0.004$ . c Protease activity of *P. tricornutum* protein extracts measured as in b (primary Y axis). Cell abundance (secondary Y axis) measured during 8 days of growth. Points are means  $\pm$  s.d. of triplicates.

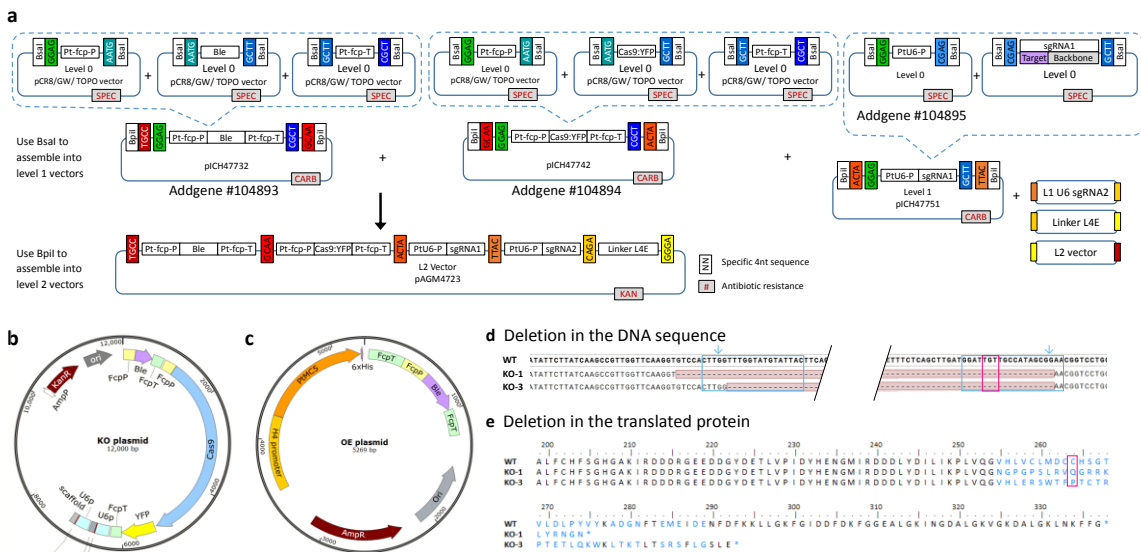

**Supplementary Fig. 6** Schematic representation of assembly, final transformation vector for PtMC5 knockout and overexpression, and the exact deletion in the DNA and protein sequence.

**a** Schematic view of Golden Gate assembly for CRISPR/Cas9-mediated PtMC5 KO vector. GG 4 nt sites are marked in colored boxes, bacterial antibiotic resistance, Spec, Carb or Kan are marked in gray boxes. Schematic representation of *P. tricornutum* transformation vectors used for PtMC5 KO (b) or PtMC5 overexpression (c). The OE vector includes bacterial antibiotic resistance (ampicillin resistance), diatom antibiotic resistance (Bleomycin resistance under *P. tricornutum* Fcp promoter and terminator) and His-tagged PtMC5 cDNA under histone 4 promoter (H4) and Fcp terminator. Plasmid maps were generated using Snapgene. **d** DNA sequence of clones KO1 and KO3 aligned to the WT PtMC5 gene. The sgRNAs are indicated in blue frame, the expected sgRNA cut positions are indicated by blue arrows. The active-site (C264) is marked in magenta frame. **e** Translated protein, based on DNA sequence, of WT and the two KO lines, starting from amino acid 199. The active-site (C264) location is marked in magenta frame, frameshifts are marked in bold blue text.

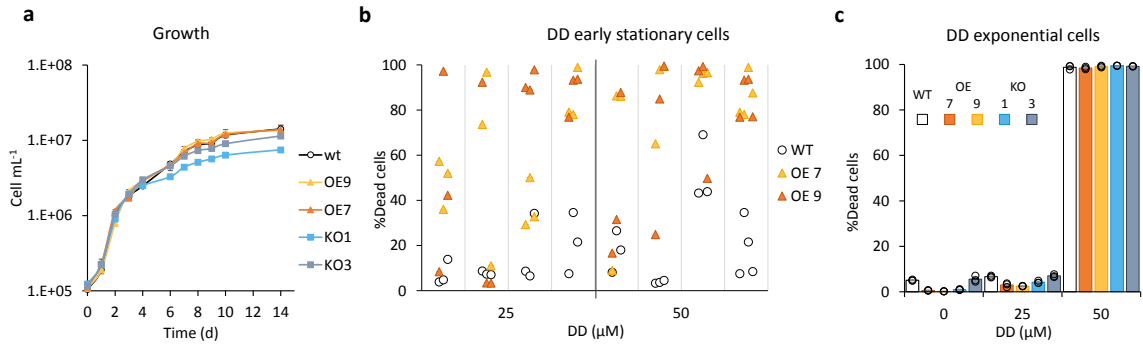

**Supplementary Fig. 7** Phenotype of *P. tricornutum* cells with PtMC5 overexpression or knockout **a** Growth curve of *P. tricornutum* WT, overexpression (OE7, 9) and knockout (KO1, 3) lines over 14 days, presented as means  $\pm$  s.d. of triplicates. **b** Induction of cell death 24 h after DD treatment of early stationary cultures, measured as Sytox positive cells. Eight individual experiments are separated by vertical lines, each replica is marked in a circle (WT) or triangle (OE). **c** Induction of cell death 24 h after DD treatment of exponential cultures ( $1.1 \cdot 10^6$  cells·mL<sup>-1</sup>), measured as Sytox positive cells. Single measurements are indicated in circles, bars are means  $\pm$  s.d. of triplicates. Flow cytometry, analysis is based on fluorescent measurements of at least 10,000 cells per sample.

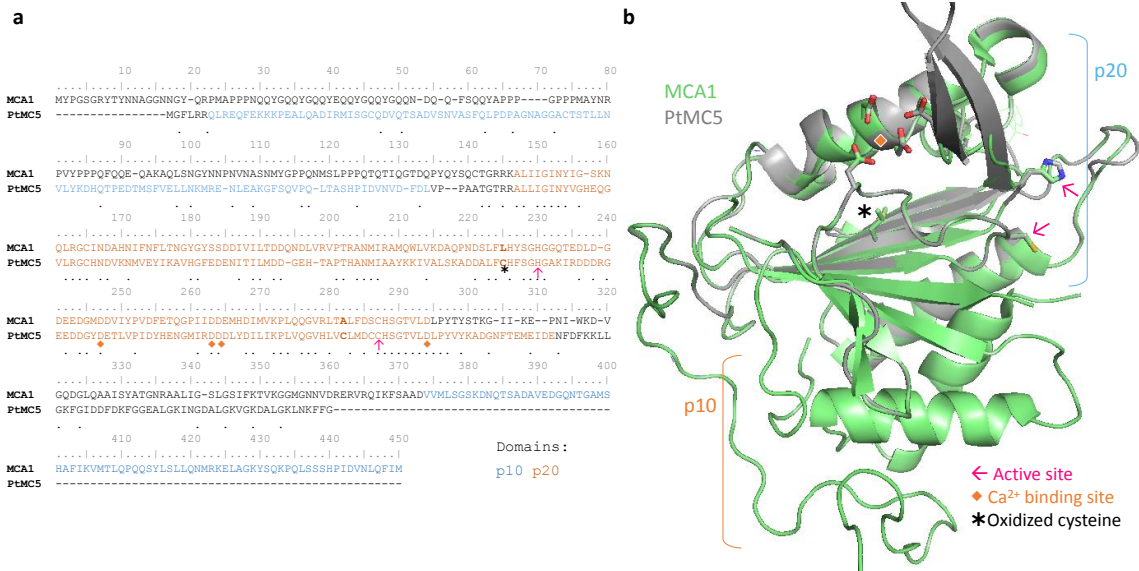

**Supplementary Fig. 8** Protein sequence and structure of PtMC5 aligned to *S. cerevisiae* MC (MCA1). **a** Protein sequence alignment of *S. cerevisiae* MC (MCA1) and PtMC5. The p20 domains marked in blue, the p10 domains in orange. identical amino acids are marked with dots. **b** Cartoon representation of MCA1 structure<sup>3</sup> (green) aligned with PtMC5 (gray), practically only the p20 domain is modeled. Key amino-acids side chains presented as sticks with conventional coloring, oxygen in red, nitrate in blue and Sulphur in yellow. The active site is marked in magenta arrows, Ca<sup>2+</sup> binding site is marked with orange rhombus, and C202 in PtMC5, detected as oxidized in lethal stresses marked in black asterisk.

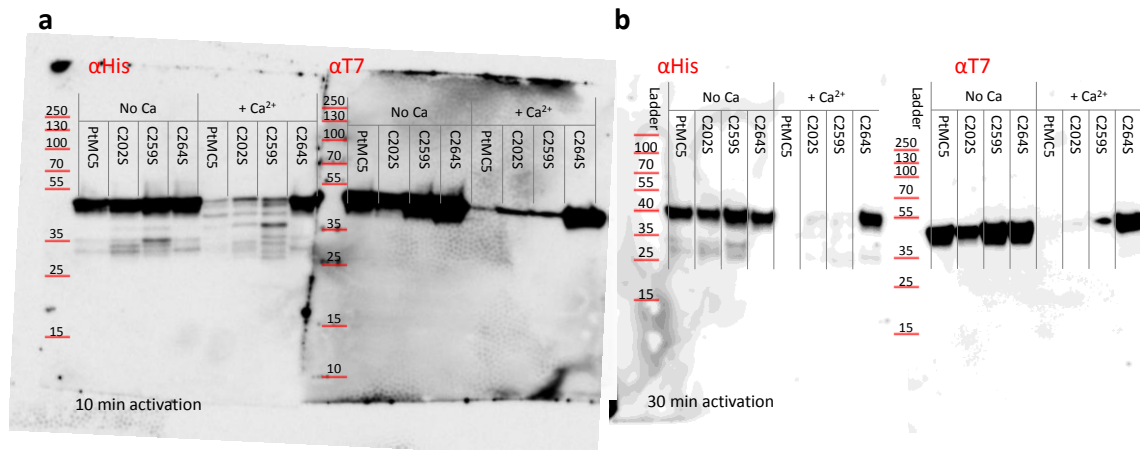

**Supplementary Fig. 9** Full membranes used to reconstruct Fig. 4c, and similar membranes following longer activation of PtMC5. Immunoblot with (HRP)  $\alpha$ His or  $\alpha$ T7 tags of PtMC5, PtMC5<sup>C202S</sup>, PtMC5<sup>C259S</sup>, and PtMC5<sup>C264S</sup>. Similar amounts of protein extracts per lane were incubated with activity buffer containing 10 mM DTT, 0.1% CHAPS and without / with 10 mM CaCl<sub>2</sub> prior to gel loading. **a** Full membranes used to reconstruct Fig. 4c, ~0.88  $\mu$ g protein per lane were incubated for 10 min in activity buffer. **b** About 4  $\mu$ g protein per lane were incubated for 30 min in activity buffer. Protein ladders are presented in the left of each membrane, size in kD.

*C. debilis*1 KRAVLIGINYVQ-EGELSGCHNDVIRIKDYLNIFQGFEEERHTLLMDDGININPTKGRIRAYRRIVKVSAGDITVF

*P. alata*5 KRAVLIGINYVQ-SGELSGCHNDVFNKDYLVNVLGFENRHTLLMDDGLNTSPTRENITAYRDLVNRSPAGDVAF

*C. curvisetus*4 KRAVLIGINYVQ-NGELSGCHNDVKNMKYELMNVHGFESNMTVLMDDGYHLNPTRYNITNAYQNLVRSMPGDSVF

*C. debilis*2 KRAVLIGINTGQ-QGELSGCHNDVKNMKEYLITVHGFEEQNMLILMDDNYPHNPTRMNLVAYRNLVRSKPGDITAF

*H. sinensis*3 RRAVLIGINYVQ-QQLSGCHNDVKNMKYLMQVHGFEEHNMTILMDDGYHREPTRYRNVAYKDVVRQSLPGDITVF

*C. curvisetus*1 KRAVLVGINYVGL-PGQLSACHYDVKNMKEYLITELGFEEKNMIILMDDHHTRPTRYAIIITAYRNLVRSKAGDITVF

*D. brightwellii*4-4 KRALLIGINYVQ-NGELSGCHNDVLNKEYLMDVLFGEEDNIMVLMDDGIIHEPTRDSILSGYRRLVAESVAGDITVF

*S. dohrnii*3 QRAVLIGINYKQ-KGQLSGCHNDVHNVQYKLVQGFVKDENITILMDDGMHKPPTKSAIIISAFKRLVKQTKEGDVVF

*S. marinoi*3 QRAVLIGINYKQ-KGQLSGCHNDVHNVQYKLVQGFVKDENITILMDDGMHKPPTKSAIIISAFKRLVKQTKEGDVVF

*Skcos16234* QRAVLIGINYKQ-KGQLSGCHNDVHNVQYKLVQGFVKDENITILMDDGMHKPPTKSAIIISAFKRLVKQTKEGDVVF

*T. antarctica*4 QRAVLIGINYTGQ-SGELSGCHNDVHNVQYKLVQGFVKDENITILMDDGAHKPPTKAGIVNAKRLVKESKGDVVF

*T. miniscula*4 QRAVLIGINYTGQ-SGELSGCHNDVHNVQYKLVQGFVKDENITILMDDGMHKAPTKSAIIIGAYKRLVKESREGDVVF

*T. gravida*1 KRAVLIGINYTGQ-KGELSGCHNDVKNVARYLSEVQGFVKDENITILMDDGNHKKPPTKTAIIISAYKRLVKESKGDVVF

*T. rotula*4 KRAVLIGINYTGQ-KGELSGCHNDVHNVQYKLVQGFVKDENITILMDDGNHKKPPTKSAIIISAYKRLVKESKGDVVF

*T. pseudonana*3 QRAVLIGINYVQ-KGQLSGCHNDVLNVAKEYLQVGFVKDENITILMDDGNHKSPTKSAIIISAYKRLVKESKGDVVF

*T. weissflogii*1010-2 KRAVLIGINYTGQ-SGELSGCHNDVKNISYKLVQGFVKDENITILMDDGQHKPPTKSAIIISAYKRLVKESKGDVVF

*T. oceanica*2 KRAVLIGINYTGQ-PGELSGCHNDVKNKEYYIKAVHGFEENITILMDDGNHRSPTKAAIIISAYKRLVKESKGDVVF

*D. brightwellii*4-1 KRALLIGINYTGMPGELTGCNDVKNVKEYLMEHSFKEENITVLMDDNVHESPTKANIISYKRLVKESKGDVVF

*D. brightwellii*4-2 RRAVLIGINYTGMPGALTGCNDVKNKEYYIMDVHGFEEHTITVLMDDGKHPPPTKANIISAYKRLVKESKGDVVF

***P. tricornerum***5 RRALLIGINYVGHQGVLRGCHNDVHNVQYKLVQGFVKDENITILMDDGEHTAPTHANMIIAYKRLVKESKGDVVF

*A. mhiphoral* RRALLIGINYVGHQGVLRGCHNDVHNVQYKLVQGFVKDENITILMDDGEHTAPTHANMIIAYKRLVKESKGDVVF

*F. solaris*1 RRALLIGINYVGHQGVLRGCHNDVHNVQYKLVQGFVKDENITILMDDGEHTAPTHANMIIAYKRLVKESKGDVVF

*A. glacialis*1 RRALLIGINYVGHQGVLRGCHNDVHNVQYKLVQGFVKDENITILMDDGEHTAPTHANMIIAYKRLVKESKGDVVF

*A. glacialis*2 KRALLIGINYIGQ-QGELSGCHNDVNMVEYKLVQGFVKDENITILMDDGEHTNPTRSNIIISAYKRLVKESKGDVVF

*E. spinifer*4 KRALLIGINYVQ-QGQLSGCHNDVLMVVEYKLVQGFVKDENITILMDDGSHVNPTRSNIIISAYKRLVKESKGDVVF

*E. spinifer*2 KRALLIGINYIGQ-QGELSGCHNDVNMVEYKLVQGFVKDENITILMDDGEHTNPTRSNIIISAYKRLVKESKGDVVF

*P. alata*2 KRALLIANYVQ-KGELTGCINDALNMKEYYIMDVHGFEEENITIMDDGHEMPTRENIINAYNDLVIQSEAGDSIF

*P. alata*3 KHALLIGINYVQ-SGELSGCHNDVNIISYKLVQGFVKDENITILMDDGSHSPTRENIMSAFRMLVKSQVGGDSAF

*S. menzeli*1 QRALLIGINYKQ-TGQLSGCHNDVHNVQYKLVQGFVKDENITILMDDGMHKPPTKSAIIISAFKRLVKQTKEGDVVF

**..\*\*.\*. \* . \* \* \* \* \* . : . : . \* : : : \* . : \* : . : \***

*C. debilis*1 CHYSGHGGRTKDLDG-DESDGLDETLIPVDYQASAGQIIDDLLFKELVQPMSEGVAHCLMDCCHSGTVLDLPHYFTAE

*P. alata*5 CHYSGHGGFVDDTSG-DEEDGRDETLIPVDYQASAGQITDDELLKDLVHPKAGVLTCLMDCCHSGTVMDLPHYFTAD

*C. curvisetus*4 CHYSGHGGVVRTDTS-DEDDGDFDETLIPVDYQASAGQIIDDLLFKELVQPLPKGVLMCLMDCCHSGTVLDLPHYFTAD

*C. debilis*2 CHYSGHGGSVKDYSG-DEEDGDFDETLIPVDYQASAGQIIDDLLFKELVLRPMSTGVMLCLMDCCHSGTVLDLPHYFTAD

*H. sinensis*3 CHYSGHGGSVRDASG-DEEDGDFDETLIPVDYQASAGQIIDDLLLENLKVPLSRDVLMTCLMDCCHSGTVLDLPHYFTAD

*C. curvisetus*1 CHFSGHGSRVDTSG-DEDDGDFDETLIPVDYQASAGQIIDDLLKLVKPMKAGVLTCLMDCCHSGTVLDLPHYFTAD

*D. brightwellii*4-4 CHYSGHGGRLVDDDG-DEDDGDFDETLIPVDYQASAGQIIDDLLKLVPMKAGVLTCLMDCCHSGTVLDLPHYFTAD

*S. dohrnii*3 CHYSGHGGRLPDDNG-DEDDGDFDETLIPVDYQASAGQIIDDLLKILVHPMPAKVTMTCLMDCCHSGTVLDLPHYFTAD

*S. marinoi*3 QYSGHGGRLPDDNG-DEDDGDFDETLIPVDYQASAGQIIDDLLKILVHPMPAKVTMTCLMDCCHSGTVLDLPHYFTAD

*Skcos16234* QYSGHGGRLPDDNG-DEDDGDFDETLIPVDYQASAGQIIDDLLKILVHPMPAKVTMTCLMDCCHSGTVLDLPHYFTAD

*T. antarctica*4 CHYSGHGGRLPDDNG-DEDDGDFDETLIPVDYQASAGQIIDDLLKILVHPMPAKVTMTCLMDCCHSGTVLDLPHYFTAD

*T. miniscula*4 CHYSGHGGRLPDDNG-DEDDGDFDETLIPVDYQASAGQIIDDLLKILVHPMPAKVTMTCLMDCCHSGTVLDLPHYFTAD

*T. gravida*1 CHYSGHGGRLPDDNG-DEDDGDFDETLIPVDYQASAGQIIDDLLKILVHPMPAKVTMTCLMDCCHSGTVLDLPHYFTAD

*T. rotula*4 CHYSGHGGRLPDDNG-DEDDGDFDETLIPVDYQASAGQIIDDLLKILVHPMPAKVTMTCLMDCCHSGTVLDLPHYFTAD

*T. pseudonana*3 CHYSGHGGRLPDDNG-DEDDGDFDETLIPVDYQASAGQIIDDLLKILVHPMPAKVTMTCLMDCCHSGTVLDLPHYFTAD

*T. weissflogii*1010-2 CHYSGHGGRLPDDNG-DEDDGDFDETLIPVDYQASAGQIIDDLLKILVHPMPAKVTMTCLMDCCHSGTVLDLPHYFTAD

*T. oceanica*2 CHYSGHGGRLPDDNG-DEDDGDFDETLIPVDYQASAGQIIDDLLKILVHPMPAKVTMTCLMDCCHSGTVLDLPHYFTAD

*D. brightwellii*4-1 CHFSGHGSQIKDDDFEEDGDETLIPVDYQASAGQIIDDLLKILVHPMPAKVTMTCLMDCCHSGTVLDLPHYFTAD

*D. brightwellii*4-2 CHFSGHGGMLPDDNG-DEDDGDFDETLIPVDYQASAGQIIDDLLKILVHPMPAKVTMTCLMDCCHSGTVLDLPHYFTAD

***P. tricornerum***5 CHFSGHGAKIRDDDRGEEEDGDETLIPVDYQASAGQIIDDLLKILVHPMPAKVTMTCLMDCCHSGTVLDLPHYFTAD

*A. mhiphoral* CHYSGHGCKIRDDDRGEEEDGDETLIPVDYQASAGQIIDDLLKILVHPMPAKVTMTCLMDCCHSGTVLDLPHYFTAD

*F. solaris*1 CHYSGHGAKIKDDEQGEEDKDYDETLIPVDYQASAGQIIDDLLKILVHPMPAKVTMTCLMDCCHSGTVLDLPHYFTAD

*A. glacialis*1 CHYSGHGGSTRDDDRGEEEDGDETLIPVDYQASAGQIIDDLLKILVHPMPAKVTMTCLMDCCHSGTVLDLPHYFTAD

*A. glacialis*2 CHYSGHGGKLRDDD-GDEEDGDFDETLIPVDYQASAGQIIDDLLKILVHPMPAKVTMTCLMDCCHSGTVLDLPHYFTAD

*E. spinifer*4 CHYSGHGGKLRDDD-GDEADGDFDETLIPVDYQASAGQIIDDLLKILVHPMPAKVTMTCLMDCCHSGTVLDLPHYFTAD

*P. alata*2 CHYSGHGGKLRDDN-GDEEDGDFDETLIPVDYQASAGQIIDDLLKILVHPMPAKVTMTCLMDCCHSGTVLDLPHYFTAD

*P. alata*3 CHYSGHGGKLRDDN-GDEADGDFDETLIPVDYQASAGQIIDDLLKILVHPMPAKVTMTCLMDCCHSGTVLDLPHYFTAD

*S. menzeli*1 **CHYSGHGGRLPDDN-GDEDDGDFDETLIPVDYQASAGQIIDDLLKILVHPMPANVSMTC**LMDCCHSGTVLDLPHYFTAD

**..\*\*.\*. \* . \* \* \* \* \* . : . : . \* : : : \* . : \* : . : \***

**2 Cysteines**  
**Active site**

**Supplementary Fig. 10** Protein sequence alignment of the p20 domain of diatoms 2-Cys MCs, and *S. menzeli* MC1. PtMC5 is marked in bold, active site marked in red, 2-Cys in blue.

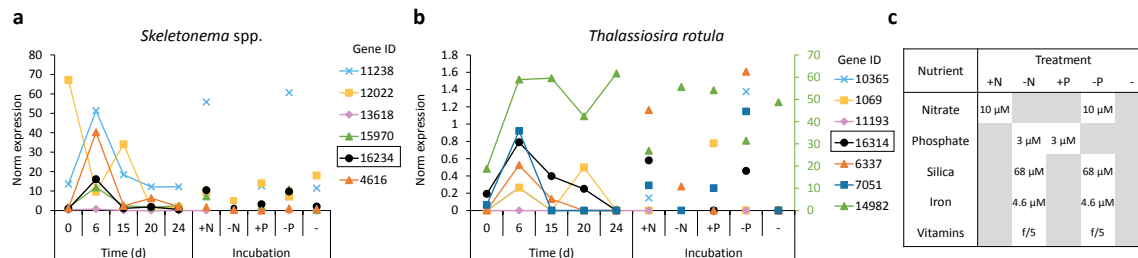

**Supplementary Fig. 11** Differential expression of 2-Cys MCs in a natural diatoms bloom. MCs relative expression from a metatranscriptome of *Skeletonema* (a) & *Thalassiosira* (b) natural bloom in Narragansett Bay, data obtained from Alexander *et al.*<sup>4</sup>. Relative expression of MCs in the natural bloom as sampled for 24 days, or following 48 hour incubation of day 15 samples. 2 Cys MCs are marked in black circles. Added nutrients for incubation experiments described in c.

**Supplementary Table 1** All PtMCs peptides detected in redox proteomics in response to lethal treatments of DD or H<sub>2</sub>O<sub>2</sub> in compare to non-lethal treatments

| PtMC | Cysteine | Peptide (Cys)                    | H <sub>2</sub> O <sub>2</sub> ( $\mu$ M) |       | DD ( $\mu$ M) |        |        |          |       |       |       |        |
|------|----------|----------------------------------|------------------------------------------|-------|---------------|--------|--------|----------|-------|-------|-------|--------|
|      |          |                                  | 0                                        | 150   | 5 - 25        | 5 - 25 | 5 - 25 | 5-25 avg | 25    | 25    | 25    | 25 avg |
| 2    | 134      | AVL IGINYTGQQQLSG <b>C</b> HNDVK | 0.082                                    | 0.106 |               |        |        | ND       |       |       |       | ND     |
| 4    | 135      | AVMIGINYTGQQQLSG <b>C</b> HNDVK  | 0.135                                    | 0.175 |               |        |        | ND       |       |       |       | ND     |
| 5    | 144      | <b>G</b> C <b>H</b> NDVK         | ND                                       | ND    | 0.285         | 0.324  | 0.584  | 0.398    | 0.419 | 0.538 | 0.557 | 0.504  |
| 4    | 193      | AGDAIF <b>C</b> HYSGHGGK         | 0.226                                    | 0.139 | 0.202         | 0.234  | 0.424  | 0.287    | 0.311 | 0.397 | 0.305 | 0.338  |
| 5    | 202      | ADDALF <b>C</b> HFSGHGAK         | 0.272                                    | 0.340 | 0.214         | 0.197  | 0.142  | 0.189    | 0.387 | 0.424 | 0.383 | 0.398  |
|      |          |                                  |                                          |       | 0.182         | 0.215  | 0.183  |          | 0.361 | 0.421 | 0.413 |        |

In Rosenwasser *et al.*<sup>5</sup>, *P. tricornutum* cells were treated with 150  $\mu$ M H<sub>2</sub>O<sub>2</sub> (lethal). Treated and untreated cells were sampled after 20 min. In addition, *P. tricornutum* cells were sampled 2 h after treatment with 25  $\mu$ M DD, with (non-lethal) or without (lethal) pre-treatment of 5  $\mu$ M DD 4.5 h before sampling. PtMC number, Cys number, and detected peptide (oxidized Cys marked in bold red) are shown. Average degree of oxidation in each H<sub>2</sub>O<sub>2</sub> treatment<sup>5</sup>, and individual and average degree of oxidation in each DD treatment are shown. ND - not detected.

**Supplementary Table 2** Abundance of 2-Cys MCs across diatoms species

| <b>Genus</b>            | <b>Species</b>       | <b>Isolate</b>       | <b>#detected MCs</b> | <b>#2 Cys MCs</b> | <b>Classification</b> |
|-------------------------|----------------------|----------------------|----------------------|-------------------|-----------------------|
| <i>Amphiprora</i>       | <i>sp.</i>           | CCMP467              | 5                    | 1                 | Raphid Pennate        |
| <i>Amphora</i>          | <i>coffeaeformis</i> | CCMP127              | 7                    | -                 | Raphid Pennate        |
| <i>Asterionellopsis</i> | <i>glacialis</i>     | CCMP134              | 3                    | 2                 | Raphid Pennate        |
| <i>Chaetoceros</i>      | <i>affinis</i>       | CCMP159              | 3                    | -                 | Polar Centric         |
|                         | <i>curvisetus</i>    | Unknown              | 3                    | 2                 |                       |
|                         | <i>debilis</i>       | MM31A-1              | 4                    | 2                 |                       |
|                         | <i>neogracile</i>    | CCMP1317             | 3                    | -                 |                       |
| <i>Corethron</i>        | <i>pennatum</i>      | L29A3                | 6                    | -                 | Radial Centric        |
| <i>Ditylum</i>          | <i>brightwellii</i>  | GSO104               | 7                    | 3                 | Polar Centric         |
| <i>Extubocellulus</i>   | <i>spinifer</i>      | CCMP396              | 5                    | 2                 | Polar Centric         |
| <i>Fistulifera</i>      | <i>solaris</i>       |                      | 4                    | 1                 | Raphid Pennate        |
| <i>Fragilariopsis</i>   | <i>kerguelensis</i>  | L26-C5               | 6                    | -                 | Raphid Pennate        |
|                         | <i>cylindrus</i>     |                      | 5                    | -                 |                       |
| <i>Hemiaulus</i>        | <i>sinensis</i>      |                      | 3                    | 1                 | Polar Centric         |
| <i>Nitzschia</i>        | <i>punctata</i>      | CCMP561              | 5                    | -                 | Raphid Pennate        |
| <i>Phaeodactylum</i>    | <i>tricornutum</i>   | CCMP2561             | 5                    | 1                 | Raphid Pennate        |
| <i>Proboscia</i>        | <i>alata</i>         | PI-D3                | 6                    | 3                 | Radial Centric        |
| <i>Pseudo-nitzschia</i> | <i>australis</i>     | 10249 10 AB          | 3                    | -                 | Raphid Pennate        |
|                         | <i>fraudulenta</i>   | WWA7                 | 4                    | -                 |                       |
| <i>Skeletonema</i>      | <i>costatum.</i>     | Skcos16234           | 5                    | 1                 | Polar Centric         |
|                         | <i>dohrnii</i>       | SkelB                | 3                    | 1                 |                       |
|                         | <i>marinoi</i>       | SkelA                | 3                    | 1                 |                       |
|                         | <i>menzelii</i>      | CCMP793              | 3                    | -                 |                       |
| <i>Thalassionema</i>    | <i>nitzschioides</i> | L26-B                | 4                    | -                 | Araphid Pennate       |
| <i>Thalassiosira</i>    | <i>rotula</i>        | CCMP3096<br>(+Throt) | 7                    | 1                 | Polar Centric         |
|                         | <i>antarctica</i>    | CCMP982              | 3                    | 1                 |                       |
|                         | <i>gravida</i>       | GMp14c1              | 2                    | 1                 |                       |
|                         | <i>miniscula</i>     | CCMP1093             | 4                    | 1                 |                       |
|                         | <i>oceanica</i>      | CCMP1005             | 3                    | 1                 |                       |
|                         | <i>pseudonana</i>    | CCMP1335             | 6                    | 1                 |                       |
|                         | <i>weissflogii</i>   | CCMP1010             | 3                    | 1                 |                       |
| <i>Thalassiothrix</i>   | <i>antarctica</i>    | L6-D1                | 6                    | -                 | Araphid Pennate       |



**Supplementary Table 3** A list of primers used in this study

| #                                              | Name           | Target                   | Sequence (5' – 3')                                          |
|------------------------------------------------|----------------|--------------------------|-------------------------------------------------------------|
| <b>Heterologous expression of PTMC5</b>        |                |                          |                                                             |
| 1                                              | C202S F        | PtMC5 in pET-21          | GATGATGCGCTCTTTAGCCACTTTTCCGGTCAC                           |
| 2                                              | C202S R        | PtMC5 in pET-21          | GTGACCGGAAAAGTGGCTAAAGAGCGCATCATC                           |
| 3                                              | C264S F        | PtMC5 in pET-21          | TGCTTGATGGATTGTAGCCATAGCGGAACGGTC                           |
| 4                                              | C264S R        | PtMC5 in pET-21          | GACCGTTCCGCTATGGCTACAATCCATCAAGCA                           |
| 5                                              | SDM C259S F    | PtMC5 in pET-21          | CACTTGGTTAGCTTGATGGATTG                                     |
| 6                                              | SDM C259S R    | PtMC5 in pET-21          | GACACCTTGAACCAACGGC                                         |
| 7                                              | T7 F           | Pet21                    | GCGAAATTAATACGACTCACTATAGGG                                 |
| 8                                              | Pet Rev        | Pet21                    | GCTAGTTATTGCTCAGCGG                                         |
| <b>Assembly of GG and CRISPR/cas9 plasmids</b> |                |                          |                                                             |
| 9                                              | GG PtFcpP F    | PH4 plasmid              | TGGTCTCAGGAGACATACCTTCAGCGTCGTC                             |
| 10                                             | GG PtFcpP R    | PH4 plasmid              | AGGTCTCACATTCTTGACATCTGGCAACCGTG                            |
| 11                                             | GG Ble F       | PH4 plasmid              | TGGTCTCAAATGGCCAAGTTGACCAGTG                                |
| 12                                             | GG Ble R       | PH4 plasmid              | AGGTCTCAAAGCTCAGTCCTGCTCCTCGGC                              |
| 13                                             | GG PtFcpT F    | PH4 plasmid              | AGGTCTCAGCTTCCTTCCTTAAAAATTTAATTTTCA<br>TTAGTTGC            |
| 14                                             | GG PtFcpT R    | PH4 plasmid              | TGGTCTCAAGCGCTCGAGAAAACCTCATCCTG                            |
| 15                                             | SDM F fcpP     | Level 0 fcpP             | AGCGTCGTCTACACTGTCAC                                        |
| 16                                             | SDM R fcpP     | Level 0 fcpP             | GAAGGTATGTCTCCTGAGACC                                       |
| 17                                             | SDM F fcpT     | Level 0 fcpT             | CACTAGCTCGACTTCACCATGG                                      |
| 18                                             | SDM R fcpT     | Level 0 fcpT             | TTATTCCTGACTGTGAAACCAAAG                                    |
| 19                                             | GG PtU6 Prom F | <i>Pt</i> Genome         | TGGTCTCAGGAGGTTGGCTCGGAAGTTGGTG                             |
| 20                                             | GG PtU6 Prom R | <i>Pt</i> Genome         | AGGTCTCACTCGACTTTGAAGGTGTTTTTTGAC                           |
| 21                                             | GG sgRNA1 F    | Scaffold                 | AGGTCTCACGAGGGATTGTTGCCATAGCGGAAGTTT<br>TAGAGCTAGAAATAGCAAG |
| 22                                             | GG sgRNA2 F    | Scaffold                 | AGGTCTCACGAGGTAATACATACCAAACCAAGTTT<br>TAGAGCTAGAAATAGCAAG  |
| 23                                             | GG SG R*       | Scaffold                 | TGGTCTCAAGCGTAATGCCAACTTTGTACAAG                            |
| <b>Scan and sequence of transformants</b>      |                |                          |                                                             |
| 24                                             | Cas F*         | L2 plasmid               | CCGAGACAAGCAGAGTGGAAAG                                      |
| 25                                             | Cas R*         | L2 plasmid               | AGAGCCGATTGATGTCCAGTTC                                      |
| 26                                             | PtMC5 ex2 F    | <i>Pt</i> Genome         | GTGAACGATGACTTTGACTTGGTCC                                   |
| 27                                             | scan KO R      | <i>Pt</i> Genome         | CGTCAATTTCCATTTCTGTAAAGTTTCCG                               |
| 28                                             | PtMC5 R seq    | <i>Pt</i> Genome         | CCTTAACTTTCATTCTGATGTGCAGCAC                                |
| 29                                             | PtMC5-KpnI 5'  | PtMC5 in pET-21          | ATATGGTACCGGATCTCAGTAGTGGTGGT                               |
| 30                                             | PtMC5 3'       | PtMC5 in pET-21          | CGGATCCGAATTCATGGGTTTCCTT                                   |
| 31                                             | H4 T → gene    | PH4 plasmid in <i>Pt</i> | GCAAGGATGCCCATTTGTGC                                        |
| 32                                             | H4 P → gene    | PH4 plasmid in <i>Pt</i> | ACAGTCAATACCGAAAACAAAC                                      |
| <b>qPCR</b>                                    |                |                          |                                                             |
| 33                                             | qMC5 F         | <i>Pt</i> Genome         | CAAGTTCCTCAGCTAACCGCG                                       |
| 34                                             | qMC5 R         | <i>Pt</i> Genome         | TTGACGTCGTTATGGCAACCTCTC                                    |
| 35                                             | TBP F**        | <i>Pt</i> Genome         | ACCGGAGTCAAGAGCACACAC                                       |
| 36                                             | TBP R**        | <i>Pt</i> Genome         | CGGAATGCGCGTATAACCAGT                                       |

\*These are primers 6,21,22 from Table 1, Hopes *et al.*<sup>6</sup>.

\*\*Primers from Table 1, Siaut *et al.*<sup>7</sup>.

**Supplementary Data 1** Full protein sequences of all the MCs used in this study.

Codes for all species presented in Table 2:

|            |                                             |
|------------|---------------------------------------------|
| Pyezoensis | <i>Pyropia yezoensis</i>                    |
| Ngaditana  | <i>Nannochloropsis gaditana</i>             |
| Cparadoxa  | <i>Cyanophora paradoxa</i>                  |
| Cc         | <i>Chondrus crispus</i>                     |
| Ppurpleum  | <i>Porphyridium purpleum</i>                |
| Aa         | <i>Aureococcus anophagefferens</i>          |
| At         | <i>Arabidopsis thaliana</i>                 |
| Cv         | <i>Chlorella variabilis</i> NC64A           |
| Cr         | <i>Chlamydomonas reinhardtii</i>            |
| Cs         | <i>Coccomyxa subellipsoidea</i> C-169       |
| Es         | <i>Ectocarpus siliculosus</i>               |
| Fc         | <i>Fragilariopsis cylindrus</i>             |
| Mrc        | <i>Micromonas pusilla</i> RCC299            |
| Os         | <i>Oryza sativa</i>                         |
| Pp         | <i>Prymnesium parvum</i>                    |
| Pt         | <i>Phaeodactylum tricorutum</i>             |
| Tp         | <i>Thalassiosira pseudonana</i>             |
| Vc         | <i>Volvox carteri</i>                       |
| Pn         | <i>Pseudo-nitzschia multiseriata</i> CLN-47 |
| Eh, Ehux   | <i>Emiliana huxleyi</i>                     |
| symbA1     | <i>Symbiodinium A1</i>                      |
| Pf         | <i>Plasmodium falciparum</i>                |
| Gt         | <i>Guillardia theta</i>                     |

Putative domains, marked on MCs full protein sequences, where available, or longest sequence where full ORF not available.

The putative p20 domain is marked in orange, the putative p10 domain is marked in blue.

```
>Pyezoensis1 contig1 GFKY01015919,GFKY01026864
MGKKAVLIGCNYPGTTKAALEGCCNDVDIMYDVLQRYKGFDAEITILKDDGSCSDELIPTGANIRKALTKL
CGEAQEDDIIIFVHFSGHGTQVPADDDDPEDDRKDEAICPTDMSLIVDDDLRAIVSTIPDGCRLTLVTDCCH
SGSMLDHSEVAIEGEKDGNSKASLLEESASLMSLLTGGTREVGGVDVKNRALPITDVASLLTQITGRSVQP
GNIRSTLGEFFGGDAGRLALQYFLKSGKSGSGMSGGLAAMAGMLAASQGGGQSSSSGGGSSGLAGLAGS
LLGGKKQSQSSGGGSAALMGLAGSLLGGKKPQQSSHSSGGGSLTAAMGMSMLSGSGGGSSGGSHSTS
HSLGGSLSEDKGILITGCQAHETSADVRPPGGKAFGALTNSIQTVLKTNPDASYDDVVSQARTVLSQAKHA
QNPCLECSEKNSRLPFIC
```

```
>Pyezoensis2 GFKY01000140,contig_9228_g2199
MSGAPPPDTWSSSSRGVGGSGGYGGYGAPSPGSGGYGPPPGGAYGQPPAHGPPPSGFDAEYEAIRIQQNEE
EARGAGGGGQTPYGSLLGPYPPQQQDPYQHPQQQQHTYAGAHGGYRAQPPSYHAQPPHPPSYAHGAPPS
NYGAAPPIQHVPPTPHVFPFGPAHPATGYVQPPNAPAPQYGPSASGPATGWTTPSGRKRALLIGINYKGTPSAL
AGCVNDVRYIQYLLASKFGFRPSDFVILTDERVDVPGARTGPPTRASILAEMRALLSGAQPGDSLFLHFSG
HGKQIKDVSQDEEDGLDEAILPSDYLRSGHIVDDEMYHILVRPMPRGRVRLTAIIDACHSATGLDLPYVHGA
PGGSQYGGGAVAAQGRGGLSSLLSGGGGNAALASMAAALGGGKPMIGGGGGSGGGGGSLGAILSAVV
MGASGKPLSGKQQAARMVEKRQPNPNAGEVIAFSACEDHATAADTHGAAGGYATGACTYSFIQAIEHGRDW
HSYTFESLLVEMRRKMRKGLKQVPQLTSSFPMSISSRFIV
```

```
>Pyezoensis3 GFKY01041200,contig_32374_g7869
```

MTIPTGHDTWTSSRTVDGGTGAANVLPFRGPPAYPLPRSNHHPFLTTPFAAAASATSSAGPDTWTPRRRPP  
TGAGNLLPWGHPAAGESASSPWRTSAPPPAAPRAVHDALIGEEIERGARVDALMRPPLSGGLPVRPVHMPW  
STAAAAPAAAASSSHFQPRKYALLVGINYWGNIHFMPTLRGCVADVNRVRRLLTSRGGYDPADIVTLTDEPL  
DGIGGAWGKFPHTDAILAEMRALVAKPKAGDSLFFHFSGHGAQEPDASGDEIDGMDETFVPADGTPTGRTI  
LDDNVHKLKLVKALPPGVRLMALIDACHSATALDLPHLLDEPWGAGHGCNAACGTEKGCDDRVI SLGACRD  
DSAAADWHRAGRGTSSAGAMTSFFIDAVERNVTGTTTHRAVLNRYVRRRILEEGMTQEPQLSSSSPLDPYARL  
EL

>Ngaditana GAGR01012758

PTNSRPYRRSLRRPPWPSTQAPTNLTYTPVGGFVANNVATPPPSQQGRPSSSLSSFPSPGYQPPRPAP  
SFPPSSSAAYRPPHRPPSSPSPLPEGSTYQRPNDLHGALPFPSSPCNGRRKALFVGITYAGTRAEKGCVN  
DVKNLHAFIQRTYGFQPEMRVLTDDPGFSEGTPTRQNIQGMRLVGGARHGDSLFFHFSGHGGSVRDQN  
GDEADGMDETILPLDHARAGQIIDDEIHDLLVKPLVQGVRLTAVFDSCHSGSVMDLFPYKVDGSLEIVQV  
DNTAKVVNSLANAGLAYLSGNKAVALMSGLEAVGTMLFGPKTNHDARRRTEENNQSPADVIQFGGCRDDQT  
SADTRIDGQATGALSVALIRVLSQGNQDYAQLVKNMRQLLRGKYTQIPQISSSHKIDLFSPFKM

>Cparadoxa1 Contig8192

MPPPPPGYRQAPAPAPGVRPTQNLLYDPSKRRRAVHVVAISYKHDEDNFLPGCWNDKSMVDLGMKQYGFKS  
KDIKMLTDEDFNKNFSPFTHLIEGARPGDILLFTFSGHGGQIKDLGDGDEIDGKDETLIPVYETAGEITDD  
ELAALFAKLPRGVRLICFLDCCHSGTGLDLPYHNNILPAPKAGQQLRNYLPASRNKALPAPSYAPPPMAKT  
SMDPETPKKKHHEPFLDAIFGPIVHPESYQDQYGNHSQQLQARAYGVGGPMDAGHEMRPIVVQTNLRENT  
GILNFGKA

>Cparadoxa2 Contig7118

MSWNPFGGAPEPPVPGVPVGFVAVNQPPPPYGAAPT VHYPVPPGNVTKKALLIGINYLRTPECRLSGCIND  
VNCMKYLLMTKYKYEERNILCMTDDQSDPLKQPTRHNIVQGMRLVMGTKANDTLFFQFSGHGSQVRDHSG  
DEADGMDETILPCDFKQAGQITDDEIYQLLRCRPLPYGSPPTPHSLPPHAFGSQRWRMDCCHSGTGFDLPY  
THSLNFFGQLSTTTEPMQPNWCCQGAWIAKRAPTRAIETSFAQKTTLYGQLVVSMLNEVQADAPTVINLA  
LEFDCHWNSGLVL

>Cparadoxa3 Contig26116

MPTKRALIVGIKYEIWPRTLNLCVNDAKEIITGTFGYAEENVKMIIEKPGFVQPTRANIMEGLSWLPGDQ  
LFFGYSGHGSQRADEGKDEVDGKDECLVPMDFQTEGYIRDDELNKLKLVVQPPPGRCLLTLGQIFDCCHSG  
SGIDLDTYTIMTAAGFSLATATAAKDPMGKGVLDLDEGDGVRAAAGADAEP SIDTVVVAQVANMQAKAVGSK

>CcMCP1 XP\_005717184.1 metacaspase type II, MCP1 [Chondrus crispus]

MGKYAVVIGVNYTKNPEAALQGCCNDARLMVNLLHSGKFEDEDIKLLVDDDDSNDSPNHVNVKALDWLCT  
GRSEGDTIFMFHSGHGTQVPADDDDDVEEDKLEAICLEELFLMADDDDLKQYFSQLPEGVRATVVMDCCHSG  
SMLDGOEVAIQGAKDEDSAVPPQESDDLNVNLGGSREAVSNRSLPISTICNVMSQKLGSPVSPTGSGVNGA  
MAQVFGGTAGKLMKFKALGQMAKQDGGSSNPLVGMGLGMMGGKSTSSSGSNPLAAMMGGGSTSSSGSNPLAA  
MMGGGGSTTSSNPLASMMGGGESTTSSNPLASMMGGGESTTSSNPLASMMGGGGSTTSSNPLASMMGGGGGS  
TTSSNPLASMMGGGGSTEQNGNPMGSLMGLGGGNASSGGSNPLASMMGGGATETETAAPQSQNPMAMLSG  
LMGGMGLGGQEDSGDAPAYNPAHQPMRDVCTLITGCQASETSADV RPAGEEAFGALTKTLTTLYEKNPET  
TYHDLVSNVRSLSRGGFKQNPCLCESETMAHQPFIC

>CcMCP2 XP\_005713893.1 MCP2 [Chondrus crispus]

MRDRGLPLPQSL SAYQRQAEASQVETVPDPPRLDGLNRKPSISPAAADYVPELPVGY SARMNRRKALLIG  
IGYRKHKYLNVLPGCKNDVTAMFNLLTSELFGFPQDEVRLSDELNMLGSHVQAPTRFNILRDLWLTED  
VGEEDSAVFFFAGHGDFIEDVSGDEIETGVDQCIMPIDCLPEPKHRTGQTFKGVPPILDDTIYERLVRGVP  
AGAKVTAIVDACRSGSVCDLPMHGDGDKYRASGGDPPQRSSPHKGAGGFVLFSGSADDQQSIDMTIAT  
GRNGEVESFGVMTRSFVDAVQEMAMHRCPETYDGVESWYTYGQLFQRVRELWERTSSILPHYIEKQEPQM  
STSHTFDTWQAPFSI

>CcMCP3 HG001672 [Chondrus crispus]

MQRHMDPNPSSPQSGLSSRRKAPPRVSLDLCEPPTGNYGARMVENGEIRSPLAAGAFQVKPKIRPARTR  
YLSLDLYAERNMQDVPMSPLVTRGGPVKSLADSGETDVRSPYSRSLSRNRRLSNVPYNASPKNSSRKAVL  
IHACYINTEGAQRLRSQSNLASMYDLLVLSLGFSGRNVVWVLTDEPKTI PGAVNFTPTRGNILNSMRWLKVG

SSAKHQLLFCFSGHGCRVLKERNPVAVFEDCILPCDYPMSSPISETEIKQILVQNLNRNGATLTSLLDCQNS  
AQLMNLPIYIHAAARGAKGSFFLREEPEAQRFTSASTPGVVLNSVLRFSKLRGGAEQRRMAAEERRNANAA  
TCFDNGTVICISWSFETERECPSISSPNNHGCLTHAFVRYLKHSAAEKSKPSYSTALCAMSAWLSSRGGN  
LPQFSSTHKVSPDKPISLL

>CcMCP4 XP\_005710904.1 unnamed protein product [Chondrus crispus]  
MSNPGVFPDGLDPEYSRRINANNASKPRGHLYPSSAYPPQPYPYPPGYRPPHGYSPIYAQPQNPYPPQPFH  
PPPPPPPHPPQHPYAPQQPYPAHPPQPSYNPHGPPALAQASASHMTSPFRPSGRKALLVGINYRGTSSALR  
GCVRDVTFVHLLVSKFGFRKKDFVVLTDSEVNI PGVRKGPPTRRVILDSLKWLVSRSRSGDSLWFSFSGH  
GAQVRDVSGDESDGFDETI PVVDHKRAGHI IDDELYEIVRHVARGARLTVLLDACHSGTGLDLPYQHDVFG  
TSGSQRISGGKGMSLTSGLLNVAGALLNGSASGALNAGFNMATGGKKKKKTPGDPNAGEVLLFSGCKDNQ  
TSADTSKLTGGLPTGAMTFALIEHSTVGDWRNYNYRQLLQTMRQKLRAAKMTQVPQFSTSHPFDLSTS  
FML

>Ppurpleum1 evm.model.contig\_3552.1  
MWSSSYAPGSAPQQPGTFYGAQPPPPPPQXXXXXXXXXXXXXXXXXXXXXXXXXXXXXXXXXXXXXXXXXXXX  
XXXXXXXXXXXXXXXXXXXXXXXXXXXXXXXXXXXXXXXXXXXXXXXXXXXXXXXXXXPYQQYPPEQPI LASMVSSNALGTTKLSIN  
YYQDSRLPASAXXXXXXXXXXXXXXXXXXXXXXXXXXXXXPVQHPGYGPAAPKAPATGRRKAVLIGINYTGTRN  
QLKGCVNDVRFIKHLLQTRFGFKDEDFILTDEDPKISGVRRAAPTRYNI IDALRWLIGGVTAGDSLFFHF  
SGHGSQVRDTNGDEEDGYDETI LPVDFQQRAGQIVDELHAILVKPLPAGARLTALIDACHSGTGLDLPYVM  
DVDQYDPSAVAASGYGRGAQQRGGGNERGLIGAMIGAGLMSASYGAPPNKRKKYQKKVPLAPACAGDAV  
LFSGCDDHQTADTSGLSGGTSTGAMTYCFVEAIEHGSVSDWHQYTYGSLLSMTRSKLLKKGYKQRPQLSS  
GKPMASSTPFRI

>Ppurpleum2 evm.model.contig\_2187.3  
MVAKRAVLVACNYPGTNAELKGCISDAKIHKSIIEKKGFKESDIKVLIDDESELTSYAPPTGENIKKAL  
TELCESAQPGDFLFFSFGHGTQVPGGAEEEDGKNEALCPTDMNLLVDDDIRDIVNKTCKGVTTLTVCDCC  
HSGGMIDHSSILIDSDDKADPDAPPVEFRSRELPI SGVAERLSQLLGKTVDPNGTAVRGAIEHEKYGAAASK  
FAVGMFENYTGKKMGTEKKKLTGMITSCFSALGVGGGGGGSDHSNAAPAVSGGSAGGPPKKVGHMVHVD  
EEMGILITGCRAHETSADVRENGQAFGALSKNLHLYLETKPDATFYEVVHGARDRLADKGFTQNPCLECAK  
DNAALPYICPNV

>AaMC1 AA0026G00590  
ALLVGCNYPGSSAELRGCVNDVLRMRALLLGGQGFPEQQIVILRDDRGGQQRPTRRATEGLRWLAAGAGRG  
DSLFFHFSGHGSQERDRTGDEADGYDETI VPCDYKSAGQITDELHAILVRPLPDGARLTSIMDCCHSGTG  
LDLPYCFTPGRGWQTDVPCFSRQDVQLFSGCEDDQCSADTYANAAAGGAMTNAFLKALAENPMPPLYPDFL  
TALHRELRRKGFQKQPLSSQRFDLNQRVFSLTEGFI PNSNQTI GRRPGMRRKKSRRRGRGAGVGMETML  
AAGIGA AVLSSLF

>AtMC1 AT1G02170  
MYPPPPSSIIYAPMLVNCSGCRTPLQLPSGARSIRCALCQAVTHIADPRTAPPPQSSAPSPPPQIHAPPG  
QLPHPHGRKRAVICGISYRFSRHELKGCINDAKCMRHLLINKFKFSPDSILMLTEETDPYRIPTKQNMRRM  
ALYWLQVQCTAGDSL VFHYSGHGSRQRNYNGDEVGDYDETLCLDFETQGMIVDDEINATIVRPLPHGVKL  
HSIIDACHSGTVLDFLFLCRMNRAGQYVWEDHRPRSLGWKGTAGGEAISI SGCDDDDQTSADTSALSKITST  
GAMTFCFIQAIERSAQGTTYGSLLSMRTTIRNTGNDGGGSGGVVTTVLSMLLTGGS AIGGLRQEPQLTAC  
QTFDVYAKPFTL

>AtMC2 AT4G25110  
MLLLVDCSSCRTPLHLPPGATRIRCAICHAFTLIAPEPRLQSHASASPPFPNNSPAPSTFIYPPPTPSPY  
THAPHAPSPFNHAPPDSYFPTHAPPASSPFNHAPPGPPPVHVGQKRAVIVGVSYKNTKDELKGCINDANCM  
KFMLMKRFQFPESCILMLTEEEADPMRWPTKNNITMAMHWLVLSCKPGDSL VFHFSGHGNNQMDNGDEV  
GFDETLPLVDHRTSGVIVDDEINATIVRPLPYGVKLAIVDACHSGTVMDLPYLCRMDRLGNYEWEDHRPK  
TGMWKGTS GGEVFSFTGCDDDDQTSADTPQLSGSAWTGAMTYAFIQAIERGHGMYGSLLNAMRSTVHEIFD  
KNKGRELVEVGADFLSTLLGLLILGASPPDEEEVNPAPQKTQEPQLSANEAFVYKPFSL

>AtMC3 AT5G64240

MASRREVRRCRCGRMWVQPDARTVQCSTCHTVTQLYSLVDIARGANRI IHGFQQLLRQHQPQHHEQQQQQM  
MAQPPPRLLEPLPSPFPGKRAVLGCVNYKGSYSLKGCISDAKSMRSLLVQQMGFPIDSILMLTEDEASPQ  
RIPTKRNIKAMRWLVEGNRARDSLVFHFSGHGSQQNDYNGDEIDGQDEALCPLDHETEGKIIDDEINRIL  
VRPLVHGAKLHAVIDACNSGTVLDLPICRMERNGSYEWEDHRSVRAYKGTGGAAFCFSACDDDESSGYT  
PVFTGKNTGAMTYSFIKAVKTAGPARTYGHLLNLNLMCSAIREAQSRALAFNGDYTSSDASAEPLLTSSEEFDV  
YATKFVL

>AtMC4 AT1G79340

MTKKAVLIGINYPGTKAELRGCVNDVRRMYKCLVERYGFSEENITVLIIDTDESSTQPTGKNIRRALADLVE  
SADSGDVLVVHYSGHGTRLPAETGEDDDTGFDECIVPCDMNLITDDDFRDLVDKVPVPGCRMTIISDSCHSG  
GLIDEAKEQIGESTKKEAEDEDESEESSRFGFRKFLRSKVEGAIESRGFHIGGNKDEDEAEIEIETKEIE  
LEDGETIHAKDKSLPLQTLIDILKQQTGNNDIEVKGIRPSLFDAGDDSSPKVKKFMKVILGKLQAGNGEE  
GGLMGMGLKGLASGFLEGLNDEDYVKPAMQTHVGSKEEVYAGGSRGSPVPLPDSGILISGCQTDQTSADATP  
AGKPTAYGAMSNSIQTILEETDGEISNREMVTRARKALKKQGFTQQPGLYCHDGYANAPFIC

>AtMC5 T1G79330

MAKKAVLIGINYPGTKAELRGCVNDVRRVHKSIVDRFGFSEENITELIDTDESSTKPTGKNIRRALNLVE  
SAKPGDVLVVHYSGHGTRLPAETGEDDDTGYDECIVPCDMNLITDDEFRLDVEKVPKEAHITIIISDSCHSG  
GLIDEAKEQIGESTKPKKESGGSSGLGKGFVREAVEEALESKGIAPHHKDEKDNKTKELKLEDGAK  
VHVVNKSLPLQTLIDILKQNTGNNDIEVKGIRPTLNFVFGEDASPKVKKFMKVILTKLQEGKTEGGILGMI  
GKLAQEFLLKHLNDDEEYVKPAMKTHVGNKQEVYAGASNGSLADNGILISGCQTDQTSADASPOGHPPEMAY  
GAFTNAVQIILEETKGMITYKELVVKARKLLKKQGFSSQRPGLYCSDFSFNAPFIC

>AtMC6 AT1G79320

MAKKALLIGINYPGTKAELRGCVNDVRRMRISLVERYGFSEENIKMLIDTSSSIKPTGKNIRQALLDLVE  
PAKSGDVLVHYSGHGTRLPAETGEDDDTGYDECIVPSDMNLITDDDFRDLVDMVPKDCPITIIISDSCHSG  
GLIDEAKEQIGESTKPKKDSGDSSTINKETEAEIEVGNRSLPLETLIDMLKQETGNDDIEVKGIRTTFLD  
MFGDDSSPKVKKFMNVLNSLQETTTTIQTVSDEVLGSVENLAQEFLEQKLSDDVKPAIQDVYAGAINGAL  
PDNGILISGCQTDQTSADASPPGHPELAYGALTNAIQIIIGETKGIISNKDLVVKARKLLRQGFQRPGL  
YCNDAVYNARFIC

>AtMC7 AT1G79310

MAKRALLIGINYPGTTEELQGCVNDVHRMHKCLVDRFGFAEEDITVLIIDTDESYTQPTGKNIRQALSELIK  
PAKSGDVLVHYSGHGTRVPPETGEEDDTGFDECIVPSDLNPIPDDEFRLDVEQVPEGCQITIVSDSCHSG  
GLIDEAKEQIGESTTTKPNRESKVSSFEFEFKNCLHSIFVKLLAFCGIGSSHVETREIVEVGEDEVVRSR  
YLPLERFIELLKQQTGDNIEIGKIRPTLFDVFGEDSSPKIKKFMKVILTKLRKTNDQSTLLGKIEESARG  
YIEETLNDEHYMKPAMQAQVKSREIYGGRSSNGLFPDRGILLSGCQTDQTSADVKKKGEAFGAFSNAIQM  
VLSETHDKDKITNKEMVLRAREILKKQMFIIQRPGLYCNDRFVFNAPFIC

>AtMC8 AT1G16420

MAKKALLIGINYPGTAVELRGCVNDVHRMQKCLIELYGFANKDIVIMIDTDKSCIQPTGKNICDELNDLIA  
SGQSGDFLVHYSGHGTRIPPGIEDSEDPTGFDECITPCDMNLIKDQQFREMVS RVKEGCQLTIIISDSCHS  
GGLIQEVKEQIGESHMKPVDKVKEQIEESHMKQPKLGIASYFLNIVMNLATCGVSKSQDRGGGEESEFRG  
EIELEKDETLDIKTRYLPFESYLSLLKEQTGQTNIEPVRIQTLKLFKGFEDPSPNRQRGLSDLGNCEVDAG  
DSGASRLNAVTDNGILLSGCQTDQRSEDEVYVTRTGKAYGAFSDAIQMILSAPRKDKKKITNKELVSEARVF  
LKKRGYSQRPGLYCHDRFVDPKPFICY

>AtMC9 AT5G04200

MDQQGMVKKRLAVLVGCNYPNTRNELHGCINDVLAMKETILSRFGFKQDDIEVLTDEPESKVKPTGANIKA  
ALRRMVDKAQAGSGDILFFHYSGHGTRIPSVKSAHPFKQDEAIVPCDFNLITDVFRELNVQLPKGTSFTM  
ISDSCHSGGLIDKEKEQIGPSSVSSNISPAIETTNTKITSRALPFKAVLDHLSLGTGITTSDIGTHLLELF  
GRDAGLKFRLPAMDLMDLLETMTAREKHVDSGILMSGCQADETSADVGVNGKAYGAFSNAIQRVLNENEG  
AMKNKQLVMMARDVLERLGFHQHPCLYCSQDNADATFLSQP

>CvMC1 CNC64A\_020G01030

GRKKAFICGINYFGTSAKLNCGINDAKCMEYLLKSKFGFKQENILMMTDDCPDPMRRPTRANMFQGFWRWT  
MDMRPGDSLVSFHYSGHGSQTRDYSGEETDGMNETLCPMDFRQAGEIVDDELNRCLINPLPTGVKLHCIIIDA  
CHSGSVMDLPFQAHVRRGGYQWEASYHFTRAHKGTAGGFVQFGASKDSQTAADT

>CrMC1 CR12G07090  
MYGYPPPAYGAPPAGYGAPAAPSPYGAAPPYGAAPPAYGAYGAPQPAYGAPPAPAYGGYGAPPAPAYGAQ  
PAYGTPYGGQAQPSAYTYGQPSANPQORPATAPAPAYMPPTTYAPAPTNGGRRRRALLVCGCYPGTREALN  
GCLNDVNCIKFCLMNRFGFTEQQILILRDDTRQPDFISTKANIIFRGIQWLMTDQQPGDSLFFHFSGHGSQQ  
YDRNGDEEDGYDETICTDFRRAGQIVDDELNRMMVQPLMPNVTLHAVI DACHSGTALDLPYRAKVDHSGR  
WYWKGRARYDKCTRGGTAFQFGACKDSQVAADTNKLSGKAYTGAATFSFIEAIEKYGVQQTIVGVLGHHMQ  
TLRAMNGGMVSSGATGILASLLLGSSISSGQEPVLSCDKQVDLYASRLNI

>CrMC2 CR03G07540  
MPGKKAFLVIGCNYPGTNAALRGCINDVWGMKEILITYYGFTDADLTILIDTDKSYLQPTGKNIAKAKITEMV  
SAAQDGDVLFVLFHFSGHGTQIPSADGDEKDKDEAICPTDMNLICDDDLRVLLKPLETKPGVKFTFIADCCCH  
SGTLLEDHESVQISGPKSGAPPPPAIDMGALAGFLGALGQPDGRDLKNRALPFSELGMLSQLLGGVPVDAR  
TVRSMGTIFGADSSAKIQQFIGMYQALTAGTKGAAAGGAGGILQMLCACLAPPADQNGPSGTPANAQSGP  
GAHYAAPAAAGNLAEPDLKVNYPGAKPPANEQLGADVGLITGCSNETSADACPSGNPDKAHGALSNAI  
QTVIKQQQQSPGQPI TYRNLVIAVREMLTKTGFAQNPCLECSNKNADTPFIVC

>CsMC1 CV04G04400  
APAHQQPAPGQTYNPTGRKKALLCACNYRGSSELRGCINDAHCLRHLITSRFNFRDSDIVMLTDDSPNPQ  
AWPTRANMLYQMQLLWNAQPGDSLVSFHYSGHGTQIRDQYGDSESDGLNETICPCDFKTAGYIVDDEMNRLL  
VNPLPHGVRLHAIIDACHSGSALDLEFKCKVKDTGVRWKNYTRRTS IYKGTAGGEALQIGAARDKQTAAD  
TATMSGSVSTGAATFAFIQAIERQGHITYLQLLQSMNQALEQLHASTGNRPPKLPKVGGLFGGLVSKVV  
NGALDMAGLSGQTPVICSNVPFDL

>CsMC2 CV10G02150  
PPPLQDGYGAPPQPPQGYGEPPAQQRKRALICACNYAGTDNALNGCINDAKCMQYLLKTRFRGFKEEDITM  
LTDDQNDPAKWPTGNMRAHMRLVGDQATGDSLIFHFSGHGSQADWVGDEDDGYNETLCPCDFKQGGQI  
VDDELNQLLVNPLRPGVRLHAIIDACHSGSVLDMEYRAEFHNGMPVWTNEFSKRPSIYKGTAGGEAFQFGA  
ARDSQTAADTSQLSGNVSTGAATFAFIQVI IWDIVVCLDSRVLSMEGIRSEHHLNCF

>CsMC3 CV05G02260  
MGHCASKSQFDREVEEVRERPDAATVYSSQRGTPMKDLGLVNGKYSKHSIPAEPEPQRDTIPARPGTP  
SVSEIFQEPLRPSPLPTSKALPGVMSGRQLPYAAPVPPPSLPPPEYAHLAASGAWQPGRRRALLVAAN  
YSRSADGSARLRGCINDVHCLKHLLTSKFGFQDNNIVLLHDEQPHGDYWP TKDNILAAVRWLLDQCPLDS  
LVFAFSGHGS LDTLCDEHGRDGILPDSDFLEAGPIYEDEL YEGLVARLVKGSRLHCFVDTCRGIFALGLPSC  
EDERGLDSGFASLRPQPDGEVVMLSSTLSEDEDLMDSTDYSHYASTGAVTFSLIQAVEQQAATYNVLL  
RAMRYSLKNGPQHFPKVPPELSASQDFDLNRPFLL

>EsMC1 ES0009G00290  
MEDDGTTINGTMDIGPEQDNSGDPGPDTRAEDMSDDDFDTEIADGIKADVRMFGSGCQDQQT SADVHDVTK  
FGVPKSDGGAGGACTNALLVNVKDDEPDSWMSLLKGMRTTLSTKKFKQIPQMATS SKKLDIHS PSLAGGEG  
GKHRALLIGINYVGDKSAELKGCHNDVAQMKDYIVEHGYSGEDEDLKIVMDDGEHTAPTRANIIEAIEWFV  
EGAAPGDSL FMHYSGHGGSVEDNDNNEKDKRDETMIPVDYRVSGHIKDDELLAEVLVPLPEGVVLSVVMDC  
CHSGS ILDLPYTFDADEGALQLVDDGGS AVVHKKAKFNMSKMKKAQKAKLGS PYMKAIRAKAAAAAAKAA  
AAEAAAAETAATEAASEDQDQDQDQDQDKDQNDQEE SPQSGS GATFKVDSKVAVEA AAKAKELAAAKA  
ASQNQDQDQEQEQERKQPANGSTGGATKQPPSEDVAPSATVAPKQLSIETE VVKAMESGGYVTPDPVAF  
KSFTSCEAAEEDGKDDCDLSVFVVTPSSVDEESGHEHAAGISMLWVDESSTGYSIKHLTKGDARFDGKR  
AVYIEATKGEGEE PFLVAVFAPEDFKPASVGGNTRVAPESAEFVWVCDKLAHSRDETLNWTACGSFVGTK  
VKRTSATSATGERLVIVGALDEHNEGRVFGYGTSLGNEDLQ MSTFPKPRAMAASNQOVSTVQASALEKDGE  
TFAIAVALPAAIPKETAAGDSSDTSDDETEIRPSMLYAQSLNDPGFYAGRIEIPGDTRCFMTPPAYGLKT  
DVYVAGSKKAMWYDDRSWDGSTESAGVCVNAVDFTS PAKEMRTMLDKQYIRHV FILLENGKLLYTSQDPEE  
GSKFDEPIDILPNVEAFSCHIDSIGNVHVNINKNGNLMHMMMQGTGLWMQKEVMVSGRDAREHLLSVVD  
LKVTS LKKTAGKKTAKDLMDDAEADLPTISLSCGSGAMFRINGKGLMHKDKIVNVQPNMNGSVRIGQFVD  
SFSVPHVAIRMEGLDRPLEIMCGNILTKKLEKMDASALKDAKSRDAMGDDAESLIDDPDDGDLNDFVDAVA

QLAKGFEVLSPTFEFPPKNDVDGIFRLTGGAFNDKNKFVAFVDEGPAFEEEEVDDGPPSPGYESTTRQIGGG  
VESIGGELKEMASQPQRPTSVFRGDSALRGRGPVRRFTTKHRCAPDPFGMGHIGVERVRRVECRNMGNLAKK  
ARENADEAIYETKKHAAESLKSLSNAERAQEATEYAAEATKWAGEAKQAAEAVRWTQAAVEAAEA AVKA  
SEEVEMKASQDIGEMKAAQAFGARKASQDSQVDIILGVEGPEEEAARAMEAAARAVEAAGVAQQKSEQAKA  
IERLQGSQDGLVDAGDFEAGGFLSAEYSRGRFFGPPVAKKLWLAEEAKRAGARPRGRDSSYLPVRRARHGQSPA  
WPGRSPGYPRSPAIGVRYRRTAASTPAAHSDVVEAVEAAGQAVEAAAQAMERAEQAKEALGEDTGEPERK  
GDDPDDNNPREYGSAPSNKGGFFDSIANELRELADEAKREAEKEAAQAGHGPPGHTSSGLFGSEAMEGETT  
TRRPIINSTAECLTEPRWEEARKKAERTALEAARLVKAAQTAAFELKAVEEAEAAEALDSEDEGEDDIDG  
DDGAYGSTEHTSRGIGGWVKKTTKKAKSGVQSAANKTKKAAQTAARKAEAAKQAKREAEERIAKDAARKAE  
AAALQAKREAEKAAKAVAQAAEQTKKAGGLVANEVADKAKIAADVAKQAAEGAGKLAEDAGNEVGDVAGDI  
KDGVDAAAGTVKDGIVNAADKVKDVAKDTVEVVDVDMTKVVEVVEEVVVEVWEHTPEGLKVKVARKVSKVVK  
KGVDFVVKIGKVYVHFVETKLEQLIKALDWLWDKIKTGIMKAI EWLANFFKYKEILKTAEILEAQVLAGMD  
EFIKSIPQGDIKEYFNEIRQMLQKKTGLDLDAQDMSKEDTAQDDREIDPKENFVQHHAESGTFHESAGPA  
DEEEDSSDSDSDSDSGKDSMADKLQYLYGKFKKEGLNFMMSALAEGFLDVLEASTKAMMDPLKNAANAVRAW  
LADGGTQYIPVISEIYKLIITGRKLLKALFFMLAIPVITYASKALLGKWSELGLIDPAMDTNSSTMAIVE  
EDVQSSGTGAPAHLTRSLPGDNSSSEFVYTSRSGEKESDKGSETKKKVVWALLKVASIVMSGIVIPFQGDG  
KFAQLIGFDVAVKRQRCSSSSILRPIATAYKTTWLERTSCSFSRVLYGQRPVPRRCKHRKYSPPFFWVRVE  
MPLSNRMHVCANHLTAVLGCVHCLLFRIA AVVDVSKVPGQRRFPRGHRVFKIISLAKVIQKLLDRGASMVY  
VGDYFDKTKNRENKKKTVLKKGDKGLFWFTFALEVGGTVADAALGFSEQGHPHAGGLEHNTPOGGTLPVIV  
YDACEGIAEIAKGARLMWLAIEFGEGGFQOGTMVFQGVHGVFKGASQLAKAYSFKLVPPNKPPEYKIMVIL  
FAAHMKYRTNVWPLGIASVAVQLIGADKADTEDQEQTNDAYWTACHAYL

>EsMC2 ES0024G00620

MNSMGVKQGGEEERAPAAAAAAPAAGGGHGQHAAGGGGGGGKGGKRGHRAKDI PDEEFDAE IAGGIRAD  
VRMFGCEDVQTSADVHDVAKFGLPDATGAGGACTNAVLANVKDSKPDSSWMSLLKGMIRSTLKEKKFKQIPQ  
LATSKKMDIHSFPDLSSGDESGNHKALLIGINYTGKGGELKGCNDVQKREYITTHGYPADGANLKI VSD  
DGEHEEPSKENILKAIKWL VHGAKAGDSL FMHYS GHGGSVKDNTGDEEDNKDETMIPVDYMKSGQIKDDEI  
LKELVMPLEPGVVL SVVMDCCHSGS ILDL PYSF DAKDGALELVEAGGSGVMQKKKNFNVKKMKHKAQGGK

>EsMC3 ES0394G00050

MEDDGNTTNGVMIDAPEQNSNDHGSQDPPSPDTRAEDMSDDDFDTEIADEIKADVRMFGCQDKQTSADVH  
DVTKFGVPNSDGGAGGACTNALLVNVDDEPDSWMSLLKGMRTTSLTKKFKQIPQMATSKKLDIHSFSLA  
GGEGGKHRALLIGINYVGDPSVELKGCNDVAQMKDYIVEHGYPAEEGEDLKIVMDDGEHTAPTRANIIEA  
IEWLVEGAAPGDSL FMHYS GHGGSVEDTDNNEKDKRDETMIP TDYSMSGHIKDELLSELVPLPEGVVLS  
VVVDCCHSGS ILDL PYP TFD ADEGALQLVDDGGSGVVLKAKFNMTKIRKARKLNLRGYPYMKAIRAKAAAA  
AAKAAAAKAASEKQQEQEQEQTPQPVGGSSTAFKVGSKVAAAAAKARASAAAKAASQQEQEQEKPAANGGTA  
DTAKDQPPSEDVAPSSTVMQAPTFKLSIETEVIKSMETGGYITPDPTAFKSFTSCEADMEEDGQDDCDLSV  
FVVTPSVDEESGHEHAAGISMLWVDESSTGYSMKHLTKGDARFDGKRAVYIEATKGEGEEPFLVAVFAPE  
DFKPASAGGGSGVAPESTE FVVVWCDKLAHSRNETLNWTACGSIVGTVKVRTSATTSTSGERLVI VEALDV  
KNEARVFGTSLGNDLQMSMFPPTPRAMRASNQVSTVQASTLEKDGETFAIAMALPATIPKKT PVAGDSS  
DTSDDETEIRPSMLYAQSLNDPGFYAGSIEIPGDTRCFMTPPAYGLKTDVYVAGTKKVIWYDDRAWDSTE  
KAGVSLNSVDFTSPAEMRTMIDKQFIRHVFILLENGKLLYTSQDPEEGSIFDEPVDILPNVEAFSCHADS  
IGNVHVNNINKDGNLMHMMMDQGTSLWMQKEVMVAGGAAREHLISIVDLKVTALEKTSGKKTANDLMQAAE  
AEADLPTISLSCGSGAMFRINGKGHLMHKDKKVEVRPNMSGLVRIGQFVDSFSVPHVTIRMPGLDRPLEIM  
CGNILT KLEKMDASALKGAKSRDAMGDDAESLIDDPDDGLNDFVDAVAQLAKGFKVLSPTFEFPPKNDVD  
GIFRLTGRAFNEENQFVAFVDEGPAFEEEEVDDGPPSPGGAPS PRQGGAGAEP IGGELKEMATPQRRTSVF  
RGDSALHGRRPVRRFTTKHRCAPDPFGMGHLGVERVRRVECRNMGNLAKKARENADEAIYETKKHAAESLK  
AKLSNAERAQEATEYAAEATKWAGEAKQAAEAVRWTQAAVEAAEA AVKASEEVEMKASQDIGEMKAAQAF  
GARKASQESQVDIILGVEGPDEEAARAMEAAARAVEAAGVAQQTSEQAKAMERGQGSQDGLVDVDFEAGG  
FLSAEYSSGRFFGPPVAKKLWLAEEAKRAGARPRGRDSSYLPVRRARHGQSPA WPGRSPGYPRSPAIAARYR  
PAASTPAHSDVVEAVEAAGQAVEAAAQAMERAEQAKEALGEDTGEPERRDDAGDLNPREYGSAESNKGFF  
DSIAKELRELADEAKREAEKEAAQAAHGPPGYTSSGLFDTMDAGIPTRRPI TDTTAECLKEPKWEAVRQEA  
EKTAMEATRLV KAAQTA AFELKAVEEVEVAEALDSEDEEEDHIDGDY GAYGSTEYTSRKF GDRIK KATK  
VKSGVQNAAKKTKQAAQTAARKAEAAKQAKREAEERIAKDAARKAEAAALKAKREAEKSAKAVAQAAKEVK  
KAGELVAKEVADKAQIAAAAAKQAAEGA KLAENAVNEVGDVAGDIKDGVEDAADKVKDGVVHAADKVKDV  
AKDAAEVVDVTKMVDVVEEVVEEVWEHTPEGLKVKVARKVAKVVKGVDFVVKIGKVYVHFVETKLEQLV  
KALDWLWDKIKTGIMKAI EWLASFFKYKEILKTAEILEAGAIY GIDQFIATIPSEDAVKEFFNDLRLMLER

KTGLDLDAQDMSTEDTTPDDREVDPKENFVQHHSTCGTFEGAGTPADAKDDSKDQEKASEDSDDDDPGMDT  
VAEKLNLYLYEKLKEGLNFAFMSALAEIVDLEGGTQLMVKILKFVAKKFRDWLADGGPIYIPIIIESEIYKLI  
TGRKLLKALAKLFFIFAIPTVYMAKAVLGKWPVSQMVSVQDLTGAKGNTLSIAGQAPDSTDAAMIDITKIIPAG  
DRNFLTNRFFKSHPIFKIISYGRALQKILNLASTMVYVGDYFTGPKTPLKRKDKAFFSFLTMFDAAGVLVS  
LKVDGGQASEPGAGGLVNMNATEGGQTPNNATVPAIIFDMADGIAEIAKGSRLIALANELDEGGRQERTMK  
FQGSHGIFKQASQMATAFGKQIVKSPADPATKVAVIIVAAGLKWITKVPLGMASVVLQLEGS AEGKDEDKD  
LKNNAYWIACFAYL

>EsMC4 ES0414G00090

MGGFMDSIKASCTKMAKQINEAMAGDKKESASGGGSAATGTRAPEDAAYAKKVAEAIKADVRMFGSCMD  
SQTSADVVDVSKFGLPADGAGGACTNAMLLTLSDEHSDSWLGLLKGMSVLTTRKFSQVPQLSTSRIDV  
NDKFSLRNTAGGGSTKCLLIGINYIGQQGELAGCHNDVDMKKYITTHGYSMDDPADCKVLMDDNVHGMPDH  
KGVIEGFRWLTADAKAGDSLFMHYSGHGGSVKDTSGDEADNMDLTPVDYKSSGQITDDEILKELVMVLP  
EGVTLTVVMDCCHSGSILDLPYALKADEGTISAVEAGEVSSSISANPGFDFAKRAHGGGGV DIEELPRVV  
YPIFVTS

>FcMC1 FC007G01280

MDAKIQDAIPAKFVMLSGCEDKQTSADVGNVGFSLPDPGGKAGGACTSSLLKVLNENQGREMSWIDCLHR  
MRSVLKSKGFDQIPQLSSSRMLDVNHQFEIVPQESI QARGARRAVLIGINYVGGQGELSGCHNDVKNIKKY  
LIGKEGFLEKDMILMDDGRGHPTRQNIQAFDRITQYSKAGDVVFIHYSGHGGRVVDTSGEDEDDGYDET  
LIPLDFKKSQIVDDEIYERLVKKMPANVTVVCLMDSCHSGTALDLPYEINATESKM HANKGFNMGLQNP  
AMIAGCCLCLFPLMLMDD

>FcMC2 FC007G03890

MNDQSNPSIITWADLLRKMKNEINDIEYVQAPIISSTRKFDLNTPFSLVPESFDKSTGKKRSL LIGCNYHG  
TEGAELKASHDDIRSMKDYIVNVHGFPEPDDMMTILLDDKEHKSPTFTNIVEAFKSLSEQS QPGDSVFIQF  
AGHGGRI L DSPINNNVESYDEIIAPSDYNKSGIIRD TLIYKTL LAMP RYGVHVTVIIDCCDTGMMLDLPYS  
WS

>FcMC3 FC008G00950

EAQRAFENDKPDMSMRKDVRMISGCDTQTSADVSNVNSFQLPDPAGRAGGACTSTLLNLIYKDGQTPEDTM  
SFTEVLDKMRINLKENGYSQIPQLTSLNPIDITDFTLVPDATGGVRRAVMIGINYVGHEQGELSGCHND  
VLNMKKYIMNEHGFDEDNIVVLMDDGQHTSPTKSNMINAYKQIVADSEDGDTIFLHYSGHGTKVRDESGDE  
EDGYDEALCPLDYNESGLLVDDDLFAILIEPLQQGVHVMVSLMDCCHSGTILDLPIYIFKPIPNEDGSMPTSM  
KLDDTINLDGLIEQFG

>FcMC4 FC059G00280

MLGQLGKKYAGDVANKVEELTLKLNLRYPQQD TDNSNSSTSSSNKVLNSNGNKTTEKLHKISGRRAV F  
IGINYIGQKNELKGCINDVINIKNFFRSHYHIDDIMILTDDKRAEPETNYVPTRNILSAFRWL IKGAKSG  
DSL L LHYSGHGSKVKNLDGTEASGYDQTLVPVDHQKSGQI IDDDVHDVLCRKLKKGVR LTAIFDCCHSESI  
MDLPFTYNINGNLEI IENDKNQSIATLVAAGTRFLLDGNK KETKQIFKTEITNLVQSALGNETKQDSAKAK  
VME TNQTQADVIMFSGCKDDQTSADTKINGMSSGAMSYALIH TLK KHRKGGKQ QILTYTELLREMRRTLEG  
KYTQVPQLSAGRKLVLDPFRV

>FcMC5 FC073G00110

FDEQAEEAI PADVRMISGCHDEQTSADVNNVGSFNL PDPAGRSGGACTSAILQVYKEHQNSSKHLTFMDV  
FLQTRDVIKSGGFEQIPQLSSRRIDINQPFDMSTNKSQGTTRYAVLIGINYTSHKQGQLSGCHNDVQNI  
RKYIMDVGNVQSKNITILMDDGGKHTDPTRGNIMNALTDLTRKCCQAGDIAFVHYSGHGGRVKDETGEESG  
YNSTLVPVDFHIAGQIIDELYRHLV CAMPRGTTLTCLMDCCHSGSVL DLPFN FVADGEQTEM

>MrCMC1 MRCC299\_04G00220

MPSASKPPTGASNPTPKPRDAQKEKDYERKKQRVKEAHRKKRVRALMKSAPGEPVKLHYDTDCRSPATEAH  
VVMFSGVSSSESKGEIAGSSGMGWY GMPRRAGKGGAGGACANALLHYLKE SDRTKPPDRSWLTTMVG MQWL  
SKEGYTTVPRLSAGNNNFDFKRPFSILNPQCVNSQRLSGRTRAVLIGCNYPGTESALDGAWADVSKMKRYI  
ASVGFNSDGDLSMVLRRDDPNGKSGELQPTKENILEALH LALGAAEGD SLLLFHSGHGVRVNRPKASETDD  
ETVVAEDGLVPCDYKTEGPILDREVQEILVSRLPKGCSLVMFLDCCRGGSAVELPYNFKLTPKQYAFEKER



MAVGWPVRRNPLAALVDRTVMNVPNNCKRALRIGAKTADATCETIGGVLQAAADSFLPKLIKREYQRGKRK  
IHKLTGVKVQFEPHDERTHRFLF

>OsMC1 OS01G58580

MGRKRALLVGINYPGKAEKLGCHNDVDRMHRCLVDRFGFDEDDIRVLLDRDSSGTQPTGANIRRALAQLV  
GDARPGDFFLFFHYSGHGTRLPAETGQNDTGYDECIVPSDMNLITDQDFRELVQKVPNGCLFTIVSDSCHS  
GGLLDSAKEQIGNSTRQNQTQSREREPPSDSGSGFRSFLKETVRDVFESSEGIHLPRSRHSQSHYGGEDQYE  
TYAQPTDGHTKNRSLPLSTLIEMLKEKTGKDDIDVGSIRMTLFNIFGDDASPKVKFKMKVMLGKFQQQSG  
EQGGLMGMVGS LAQEFKVKLEGNEEEAFKPAIEQEVHVSDEVYAGTKTWAPNNGILISGCQSNQTSADAT  
TPQGSSYGALSNAIQITILADKRGVNSNKDLVMKARSLAKQGYTQQPGLYCSDDHVHVSFIC

>OsMC2 OS03G27120

MDHFGGRALGFGGGGGCGAVRCRHCASLPPAMPGARVIQCAQCYGVTRVGGRRRRHPNPVEPWRPAVPMP  
VAGGGFFPGSRGKRAVLIGITYAGMRRRGSQLMRGPVNDVKCMRYLLCERFGFPNDCVLILTDEEKDPCR  
LATKENIRMAMNWLVGQCSGDSLVFHFSGIGVQVPDDDDGDEVDGYDEAICPMDSFSQGPILDDEINEAIV  
RPLVHGAKLHAVVDAEHSSTVLDLPLFLCCLSSRSGGWQWEDHRPPTGAYKGSQAMLFSGCSDGNNKHS  
LLPEASTVGAMTHSFIAVECEPRATYGSLLTTMRSIMRDGGVTCNLQGPIGAPIRKVANFSGIQEPNLSC  
SEMFDIYRKPFVL

>OsMC3 OS03G27170

MGCNCLVGGKGNTRPAATTSARPSSSRCAHCGAGLAVPRPGPGGAAAVTTVRCALCHRMTCVDRRGGRD LG  
GGGGGGALEASSSSWAPAEASFLRRDAPSGYPFVPGKRALLVGVSYKGSSEYELEGTVNDVDCMRLLGES  
FGFPADSILVLTTEELGEGDPSRSPTRANLLAAMRWLVEGCDAGDSLVFHFSGHGVQKLDVNGDEVDGYNEA  
LCPVDFERSGKILDDEINETIVRPLVAGAKLHAIVDTC HSGTILDLPLFLCRLSRTGYWQWENHCRRPELAK  
GTSGGLAISISGCSDQKSADSSGFSSEQAAAAAIGAMTYSFIRAVESEPGTTYGRLLAAMRATIREGQQ  
GSSVRLLPGRLGFSVVRKMIPSGGVQEPQLCASEVFDIYRKPFLL

>OsMC4 OS03G27190

MAVVS GKRALLVGVSYKGDTSRELTGAAEDVKNMNSLLKKFLFPEESI HMLTEELGAKDPLKAPTRENIM  
KEMRWLVEGCRAGDSLVFHFSGHGRQKDDNGDEVDGRDEELCPVDYKVSIGNILDDDINDAIVKPLTQGVK  
LHAIIDTCHSGTMLDLPYLCRFNRMG LCSRYSKWKVQTRWRRLSPKKEWAMVPVGGHAISISGCKDYQNSLEP  
DNTAGGGVMTWSFLEAVGSRRTMTYGELLDSMRAKVHRLQSSSGKCLVTGCLGSLAAKCLPCCFLSVQE  
PQLCSSKEFNVEEQFIL

>OsMC5 OS03G27210

MASARPPRGTAWCGGCGAYLAVPPGARSVRCALCRAVTRVERRGHGGHGGALGFIKGLISAFAPPPPLTP  
SAGAAAAASYPRVSGKKRALLVGI SYAATGYELKGTVNDVNCMSFLLRERFAFPADCILVLTQENGDPYR  
VPTRANLLAAMRWLVEGCSAGDSLVLFHFSGHGVQKLDVDGDEADGYDEALCPVDFERAGVILDDEINETIV  
RPLVAGVKLHAIVDTC HSGTILDLPLFLCRLSRTGYWQWENHCRRPELAKGTSGGLAISISGCGDSQTS SDT  
TAFSGGAATGAMTYSFIKAVETE PGTTYGRLLSAMRATIRGGGGEVGI PGPLGAFFRRVITFSCAQEPQLC  
ASEPFDIYRKPFLL

>OsMC6 OS05G41660

MGRKRAVLVGINYAGTEGELKGC LNDVARMRRCLVDRFGFDEADIRVLADADPSTPQPTGANIRLELERLV  
GDARPGDTLFFHYSGHGLQLPIETGGDDDDTGYDECIVPCDMNLIKDQDFTELQKVPDGLFTMVSDSCH  
SGGLIDKTKEQIGSSTKQSKIQQRERELRQQAPS PGTCSCASLLQIALRHLPRRGGQRIIGSRSRDGVGE  
DQPPRSQAELLAADATRAGIKNRSLPLSTFVEMLRERTGKDDVGVGSIRTTLFHFFGDDASPKIRRLVNAM  
LGRRHGSATASEEHPDKAKPERVDGEGEAAAQKQAGAPETRPLPRNGVLI SGCQTDSETSADATTPEGVSYGA  
LSDAIQSVLAEERRGKVTNMELVRRARELLAKQGYTQQPGLYCRDKHANVAFIC

>OsMC7 OS05G41670

MGGRKRALLVGINYPGKAEKLGCHNDVARMRRALVDRFGFDEADIRVLADADRSAPQPTGANIRRELARL  
VGDARPGDFFLFFHYSGHGTRLPAETGQDDDTGYDECIVPSDMNLITDQDFTELQKVPDDCLFTIVSDSCH  
SGGLLIDKTKEQIGHSTKQNAQQIKREERSDSGTGGFRSFLKETLKETVRDAFESRGVHIPHQSSRRNDDE  
DEEPHMGSSSHGGDRIKNRSLPLSTLIEMLKEKTGKDDIDVGSIRMTLFSLFGDDASPKIKFKMKVMLTKL  
QEGQHGGVMGLVGALAEFMAKLEGNQEADALEPAMKQEVHVSVEAYAGTTARVSNGLVLI SGCQTDQTS A  
DATTPKGVSYGALSNAIQITILSEKSGRVTNKELVLRARELLSKQGYTQQPGLYCSDKHTSVAFIC

>OsMC8 OS11G04010  
MERGQKKKLATLVGCNYAGTPNELQGCINDVAAMRDALVARFGFAPADVTVLTDDRGSVLPPTGANIKRAL  
ADMVARAAPGDVLFHYSGHGTLVPPVKGRRRHGHGECDEAIVPCDFNLITDVFRRLLVDRVPRGASFTMVS  
DSCHSGGLIDLEKEQIGPSVLAAGAAPAAAAASTTATRATAARFLPYAAVVEHLSGVSGVDAAHHVADHLL  
ALFGADASAKFHRDAEQPVRTDDDGILLSGCQTDETSADVPGDDEVAAGGKACGAFSNAIQTVLASHPAPV  
SNRQLVSMARAVLSDQGFEQHPCLYCSDGNAETPFLWQEEDKKTVTAAEQAMTAL

>PpMC1 PP00016G01500  
MGGQRRIKCSSCQVETLVTLSPGTRSIICEHCLAVIQVTPVEAPSIPSKPDTYSPRHVLPYWEWSKRAVIC  
GISYGGTSELKGLNDAKCMSYLLMSKFHFPESAILVLTEQVDPRRQPTKYNIMQALEWLQGCQAGDS  
LVFHFSGHGSQQPNYIGEELDGFDETLIPVDFMTAGQIVDDINTTIVRPLPTGVDLHAIVDACHSGTVLD  
LPFLYRYSGHEAFVWEDHRPATGTWKGTAGGNVYSFSGCDDHQTVFDTMNLGRSTSTGEMTYCFIQAIERG  
YGTTYGSLNAMRSAIHMAENQLVTSIDMLLKGSYEGGDTPEPQLTSSRCFDVSTPFRL

>PpMC2 PP00043G01330  
MVRRALLVGCNYPGEPCELKGSANDVDRMHVLLTKKFGFKPTEILVLVDIDPRSRQPTGANIRKSLRKLVD  
GAEPGDVLFHYSGHGTQVPPDRGRRDETGYEECIVPSDMNLLTDDDFRELVDRIPPGCNFTFIADACHSG  
GLIDNEKEQIGDRYSMGEGLGGRPRPPLRPEAGGGGLTDLVAEGIEAFSGAGGGKQNSFMDAGVRYGGY  
LDSGDYGYSGKPHHTPLKNKSLPLNLTLSILSQTGRSVKPGNIYQNLVDFGEDASPTVKVFRILLNKL  
EGEDGGRSHGLLGKIGGLASSLLKTKIDNDPSGGYPEDRQGEELRRHRRRQRRNYDAGILISACEPHESSA  
DANPTNDPRDAYGALSNAIQTVIGESRGLTNRQVMAARRLLNEQGYKQHPCLYCSDRNADAYFLQPPPM

>PpMC3 PP00043G01350  
MSKRALLVGCNYPGTVQLHGCANDVRRMKALLIDRFQFDERDILVMLDTPALPQPTGANIRKCLDKLIE  
NTQPGDCLVFHYSGHGTQVPAESGQEDDTGAEAAIVPTDMNLLTDDDFRELVNKIPVGVTFNFLSDSCHSG  
GLIDSTKEQIGHTVKDVEEGEKEKRGFRGFLSKAKAKYDSHKGRKEEERPDTONFDFESQYMEETGHQVKN  
KNLDINSLTEILSQTGHEVQVGNIRTTFLDFMGDDASPKVKTFFVSVILNQLQSGAGEGGFMGMVSGMAGQ  
FLKSKLESDSPDHISLMAAAGSAHPSNPRSAYAGVRPSASHRVREDAGILVSGCQHNETSADATPGGDHS  
QSYGAFSNALIGVLAHKDGPITNRDLVLQIRESLAKSGFKQHPCLFCTDQNAHAHFICVD

>PpMC4 PP00065G00020  
MLVNCGRCRTPLVLPPGAMSIQCALCRHVTPAIYDRAAPSHSTPQISDPYRNSSHAPQYTPTPPNVHGRKK  
AVLVGINYFNSRHMLKGCINDSNMRHMLTTKFGFPAASILTLEEQPSAVMKPTRYNMHMAMVWLIQGCQ  
AGDSL VFHYSGHGSQQRDYSGEEADGFNETLCPVDFETAGMIVDDEINDTIVKPLPHGVRLHAIIDACHSG  
TVLDLPFLCRFNRYGQFTWEDHRPANRRWKGTSGGQAYSFSGCDDSQTSADTSALSKITSTGAMTFCFIQA  
IERGHAQTYGSLLCAMREAIRTTKVNSGMGTGTITSLMEMLVSGGSLTGGLTQEPQLTANEAFDINS PFHL

>PpMC5 PP00165G00360  
MSKRALLVGCNYPGTVKCELHGCANDVRRMKELLMNRFQFDEIDILVMLDTPSLPQPTGANIRKSLAQLIQ  
STEAGDCLVFHYSGHGTQVPAESGQEDDTGADEAIVPTDMNLLTDDDFRELVNQIPVGVTFNFLSDSCHSG  
GLIDSAKEQIGNTGISAFSGKRDVEEGEEEGGFRGLLSNMRSRFGSGNRDNDEERPDLQNFDFESQYLEE  
TSQQVKNRNLIDINTLSEMLSEQAGHPVEVGNIRTTFLDFMGDDASPKVVFVNILLSRIQSGGEEGGFMGM  
LSSAAGHYLKSCLDSESPDEAANYMAAAGSVHPSTARAAYGGVRPSASHRAREDAGILLSGCQHNETSADA  
TPAGDHSQSYGAFSNALIGVLAETEGPISNRELVLKIRESLASSGFKQHPCLYCTDENADAHFICVD

>PpMC6 PP00373G00150  
MPTKKALLVGINYEGQPHHALRGCWKDVERMGECLVSRYGFPKESICTLVDRPGTSPDLMPGTGEIIRRKLE  
ELTRDLKWDGDCIVFHFSGHGLQMPPEGEPEDETGMKEAVVPVDANMITDDDFRILVDKIPDGVFFTFIADCC  
HSGGLIAHCEQQVGSHPEDRYAAPNFGNSHEGFRGSYNGNLETVQPGAWPYGGANLQSSGRYDANLATS  
KYTSKRSMVHAVTQMLSARAGHTVEPGNICANLYDLFGDKSSVTCKEIVHTVFNGLRSKGGSKREILKRI  
SSKSIDFLSAKLHSSSLRDSNYQQQTATRDLTDATPENLSHIPKRPDRCILITACQSDETA SEHRNEIHGA  
FTKTLLEDIVDEHKGPLDNHRLVYECRQLARKPYGQHPCLYSTPAQAHHVFICY

>PtMC1 PTI\_02G05190 pink: my p10 red: CDD p10  
MGNADSKATTSLAEAETVPTGIGRKESCLRSFNDSFEETKNTAADPIHPISGRSDRKETAQARDDEISSHI  
TDDQVHVNLAMADLMAYLQVVANSSHLPLTRRDDPDLRIEGLASEEYGGKSAAFIPSDVRVIAGVFTR

YGRVWDLPTSEEYNAVDGNHEPGRSYGGACCNALLKVLYDAANDHVDAFHAVAATSASIFDDDDDEEEDLYA  
GMGQSYKSGCSLEYTNPYSVTITWCDLLRRMKAEMKDIEHVQVPKISTSRKIDLSKPFSLIPSNFDPINGQ  
KRSLLIGCNYSDIPEAQLKASHDDVRSIKDYIVNVHGFPEACGLMTVLMDDKNHKKPTFLNIVEAFKALSE  
EAQPGDAIFIQFSGHGGRVLDSDHIDTEAESYDEVLPVPCDYLSGLIRDTLIFKTLAPMRYGVTVTILIDC  
CDNGMVLELPYSWSTKGDRRSSQPKLALNEDFSFKRFLKVVRTLYESSSFTQLGRTVDIALNPMNATFKST  
TITNDESSVLFQPEKAVNAASRSSILDNFSLACSTKTLSTPRGDGDDGIVNSTGLSVMKHYSLTKQSLLO  
QVMNCTLLSPEVDEDFSFDETYQTRTEDHNTFDEEDRSVGYNSSFRSCVTEYEEESRRRGRRRRR

>PtMC2 PTI\_16G01290 (plus manual correction)

MASFDEKIKQAI PAEFHMI S GSHDSQTSADVNTGKFLPNPAGRAGGACTSALLQVLYNNGVAAGELSWV  
QCLRQMRTALNGMFGDQVPQLTSSRLIDVNTPMAIVPPTATGRKRAVLIGINYTQQGQQLSGCHNDVKNII  
KFLTKVHGFNETEMLILMDDGQHHSPTKKNIEDAFTRITQYSQAGDVVHVHYSGHGGRVRLDGDDEDDGFD  
ETLIPVDFKQAGQI IDDDILKILVKPMRQGVTVTVLMDCCHSGTVLDDL PYRFSADDSKMRIDQGNANSLFG  
KLGDMVAQVACCACLAYVVADMLLN

>PtMC3 PTI\_08G02260

MGYEQLPQLSSSRWIDVNRPLTIVPKSGRRRAIVVGINIVGQKQKELKACHNDANNVLKYLIEAQGFDP  
S QILILMDDGKHTEPTRRNIEDAFVRMTQYSQPGDVVWVFSFGHGGRAVDISGDEDDGYDETLIPLDFMKHGQ  
I IDDDILDMFVKPMKKGVNVTGDFRSRDFPWKVLMDCCHSGTVLDDL PYTYSSGDQKMRTEKNFDFGDKN  
ATNAKKQKEMEKAERKAAGENS DSDDEGDKKKKKVKEKEEDPNEGLYDQSPI PPPQPRPPTDLPPPPTP  
PNQCCRIL

>PtMC4 PTI\_16G02000

MSNYLERAEELI PAEVRMISGCRDEQTSADVSNVASFSLPDPAGSAGGACTSAMLKVLVYANHKAPQKDL  
S FQEVLMKMRGILSQGRYTQIPQLSSSRPLDIHQSFNIVPANFTGTRRAVMIGINYTQQGQQLSGCHNDV  
KNM IEFIKDIHG FEDENITILMDDGAHTEPTYKNILAAAYHELVS SAKAGDAIFCHYSGHGGKVRDD  
DGDEADGY DETLVPVDFNAAGQIRDDDI FSALIGMPAGVTLT SVMDCCHSGTVLDDL PYVFKADGE  
QNMAPPDFDFS KLAAMFQAYMVQQGANGQGGIDPNDIAIAIVAKECCNIL

>PtMC5 PTI\_16G02030 (plus manual correction)

MGFLRRQLREQFEKKEKPEALQADIRMI SGCQDVQTSADVSNVASFQLPDPAGNAGGACTSTLLNVLYK  
DHQ TPEDTMSFV ELLNKMRENLEAKGFSQVPQLTASHPIDVNVDFDLVPPAATGTRRALLIGINIVG  
HEQGVLR GCHNDVKNMVEYIKAVHGFEDENITILMDDGEHTAPHTANMIAAYKKIVALSKADDALFCH  
FSGHGAKIRD DDRGEEDDGYDETLVPIDYHENG MIRDDDL YDILIKPLVQGVHLVCLMDCCHSGT  
VLDDL PYVYKADGNFTE MEIDENFDFKLLGKFGIDDFDKFGGEALGKINGDALGKVGKDALGKLNKFFG

>TpMC1 TP20G01470

MGGDDNNNEGHTMTKEEFKATKPELTKDIRMISGCADHQTSADVSNVSSFQLPDPAGRAGGALTSTLLK  
VLYADEQKTDFTVEVMERLRGHLKGRYSQIPQLSSMNPIDVETKFDLVPDSATGTRRAVMIGIN  
YIGDNPGE LSGCHNDVNLMMKYYIMDVHGFEDNIVVLMDDGEHTEPTHDNIMNAYKKVIADAEDGDA  
IFLHYSGHGTKL RDDDFGEEKDGYDEALCPRDFASAGMIRDDDL YDILVKGCPDGVHVMVSLMDC  
CHSGS IMDLPYIFKGDG SQ TEMILDPDMNIDAFIEQITGKLVEFIKAKMAAGF

>TpMC2 TP10G02670

MRRIPNTPRGSIGIPPNGRHKAL IIGINYTGTRAAKGCVNDAKSMQQLLMRNGFGDDGSHMLLLT  
DERSR GREYQPNATNIMKAFAWFMKDVQKGDVLFHFHSGHGGQVPDKTGHEADGFNETIVPLDYERAG  
QISDDVLW GSLVYPMPEGCRILALMDMCHSGTGLDLFPDYNVDTRRWKEDVNPAPHS PGDVVLFSG  
CEDAQT SAD

>TpMC3 TP02G04700

MTDKKRSSKSGKASSIRTPPPPKRSPSSGGRS KSGRS IKSSADATPTLSSSATRGTKKNGDAEPR  
EQS RSKRSRSKSRGAHRRDGRRSRSKSRPKQQNKQEQQLVHSSSEARPKQRKSKSKSLSNKSKS  
SKSNNGS SARSAPSPSSKSGKNKAVASEFNVKRQKQK FANQAKMI PAEVFMI S GSHDAQTSADV  
SNINSSFALPNPA GKAGGACTAALMQVLYDAYDDRREDSLSWVDVLRMRDVLDSKNYDQIPQLT  
SSRMIDVHDPFVITPKSFS KKNNTQRAVLIGINIVGQKQQLSGCHNDVNLVAKYLKEVQGF  
RKENMTILMDDGNHKSPTKSAILSAYKKI VKESKEGDVVFCHYSGHGGRKIDNDGDEDDG  
HDETLIPVDFEKAGQIRDDDL LKILVHPMAAGVRMTCCMD CCHSGTVLDDL PYRFTADGD  
VEEMEMNERVNFTDALWTGMSIAVGVAAAGNAVASAVTS AVAPEMMILGGGPN AIQ

>TpMC4 TP05G02130  
MPSNMSWADLLRKMKTEMQGVGFSQAPALTSSYKFDLNTPFSLIPPNFKAGINKKRALLIGCNYRKT PDAG  
LKASHDDVRSMKDFLVNVYGFPE TSDLMTVLMDDKHHQHPTHENITEAFKRLAEKSQPGDAVVVLFSGHGC  
RVLDSPIDSEAE SYDEALVPSDYNVSGNIRD TLFVFKTLLAPMKKGVTMT C I IDCCHTGMMMDL PYIWSKN  
DKGEQLPKMSLNNEFSFVRFLKVVKTLYESSVFTKIGKT V GSEL DKQLPAKDDETVTETV GSLVTI PENEP  
PKREASLFQLLSCQNPQCLATKVINCTLHEPEYSDDDTIPKDN TMDEFYDDVSHDSYSTGSGR

>TpMC6 TP18G00030  
MTIVENPTGVKRAVLIGINIVGQQGQLSGCHNDVRNIQDFLQRVHGFQQHNMTVLMDDGRHKEPTYAKIMA  
AFDWIVKESMAGD TVWIHYSGHGGRVADQDGEDDDGYDETLIPVDFQRKGQIRDDDLLKHLVKPMRKGVVV  
TALMDCCHSGTVL DLPY

>VcMC2 VC0004G01350  
MPSKRAVLIGCNYPGTNAALRGCINDVWGMKAILEEFFGFGPSDITILIDTDPQYLKPTGKNMKAKISEMV  
AAAQDGDVVCVLHFSGHGTQIPSYGGDEKDGKDEAICPTDMNVICDDDLRALLKPLEAKPGVKFTFIADCC  
SGTLLDHETVQISGPKDGAPRPPQIDMGVLSLFGTLGQPDGRDFKNRALPFNDLCGMLSELLGGAPVDAR  
NVRSNLGT L FAGDASAKVQQFMQVFMFTAGQKEGGGAGGVPAMGLLQLL CACLAPSADQSGSGPTGQPAN  
ANSFGPATYAVGNLNEPDLKINLPTPGTKPPGDQQLSSDVGILITGCQSHETSADACPSGNPDKAHGALS  
AIQT VVRTHHQQNPQPLTYRNLVIVRELLAKTGF AQNPCLECSDTNADTPFIMH

>Pn1 jgi|Psemu1|257123|estExt\_Genewise1Plus.C\_2100062  
MTDARIKNAIPASFVMSGCEDEKQTSADVSNVGAFLPDPKKGAGGACTS SLLKVLNESGGREMSWIDLLH  
RMRSVLTSKGFQDIPQLSSSRMMDVNNRFEIVPSWAQGRRAVLIGINIEGQQGELSGCHNDAKNIQS YLI  
NEQGFRESDMI VLMDDGVNNPPTKRNIIDALDRVVEYSQAGDVVFIHYSGHGGRQRDADGDEEDGYDETLI  
PVDFKSAGQIVDDDL YAHLV LKMREGVAVVALMDCCHSGTALDLPYNINATESEM HATEGFNFGLLDNAQM  
AMGCCFLLMSLLSMFD

>Pn2 jgi|Psemu1|188031|e\_gw1.73.141.1  
MFRRNDRDLRHGEDVATSISNNNNNNDFDKQAQYLVAEVRMISGCHSLETSADVSNIH SIVGRGKLPSP  
GRAGGACTTALLSIFITFQKLLLELRRRLAQTGVSQIPQLTSSRPLELEETPFSLRGTPREGRGGTATATA  
TQRALLVGINIYGGQNGQLSGCINDVANVKKYL CNHCGFEEKHVLLI DDGRNHHPTRDNIIRALRRLVEHS  
KPGDSVYFHYSGHGGLLDPNYWNRFKAGVSKKEYDETLYPVDHARAGQIRDFNLFHFFVKPMAAGVTVTCV  
MDCCHSGSVL DLPYSYR

>Pn3 jgi|Psemu1|188378|e\_gw1.76.57.1  
MFGTLGKKYAAQVAEKVEQLALQALNERNPQTVQNEKTTEQLHKISGRRKAVFIGINIKGQK GELRGCIND  
VKNIKNFFQTHYQLDDVLVLTDDKQAEPE TKYPPTRANILNAFKWLTGAKPGDSL LLLHYSGHGGKVKNH  
TEASGYDQTLIPLDHQKSGHILDDDVHDALCRKLPKGVRLTAIFDCCHSETIMDLPYVYNI DGNLDIVLN  
DKNESVATLVSAGTRFLLDGNKKA KAVFQAELTNLVKGA VLGGNPEADSARRKQNIENNETSADVIMFSG  
CKDDQTSADATIKGEATGAMSFALVKT LKAHHKDSKRITYTELLREMRQVLE GKYTQVPQMSAGRKLMLDQ  
PIQI

>Pn4 jgi|Psemu1|320764|estExt\_fgenesh1\_pm.C\_7970004  
MKDENRDDLQRRNSIIKDDQVLVNLAMADLMAYLQVVANN SNNLPLTRRDDPELTRMVTNLSSEVYARKS  
AAFIPADVRVIAGSFLKYGNVWDLPTSEEYVASDGAQEPGRSYGGACSN SMLKVLYDAASEAADVGNIDKD  
ACDALFDDDDDES LSTLPLTRNNTFASLDMNGQSNPSTITWAE LLRKMKTEIDEIEYVQAPTIGATRKFDL  
NQPFSLVPESFDKSTGKKRSL LIGCNYNGTEGAELKASHDDICSMKDYIVNVHGFPE SDDMMTVLLDDDQH  
RPPTFMNIVEAFKSLSEESQPGDAVFIQFSGHGGRILDS PINNSVESYDEILVPSDYSKSGVIRDTLIFKT  
LLAPMRYGVCVTIVL DSCDTGMVV DLPYSWSTRSDKAGSVAKMKQSENFSFVRFLKVVKTLYESS TFTQLG  
RTVGSALGEQPTVDESSDEEAEDEEEEGEKT LSTIERTKTEEMQEGSVLGLCTPRGRAADSTYSRSENDR  
DAFSLIEKMLGCNFLVHDLDDDFSDGETFENTTYNTFDDTHTMTNASTFDLSLSDGEYRRSSRRRRSRN

>Pn5 jgi|Psemu1|320057|estExt\_fgenesh1\_pm.C\_3800004  
MATTYDEQIEEEIPGTFVFSILDAEEDERNNAVSSLEDYELPGNVVQGETSSGGVCA YALLNVLKQKNK  
GAGKKKKPKKTWADALEAMQAEIRNERGLD TYPTLSTSRPTDLWSEPMQIASSSSEGVKRALLIGLHY  
ENDGEDDGD DDDDDDAEDA KLSCHDDIRKMRQYLIHEEGFEPQNILVAMDDNGRHHEPTKEFILECVV  
RLCEI SESGDSIFFHFSGHGGRLLDEEEDDDCEI PHELLAPSDYRKGEILTND ELYSSFVREV PAGVHVVA

I IDTCHPSPSGCAMEL PYVCEAGDDEVRDSSGGFRSARA IMATV TAAAGTATVASKKKKKGKDVEKKGKQKK  
KTVDS DNSDDESENGETEDENDEESSQSEK GKTEKKPNKKKQKKDEEEEEAEEMEVPNDMEESS  
QSEK GKPEKSKKKKKKKGDEPPPKEEEASEEQEEDKPKKKKKEDKKKKSKKQKDVSNSSDDV GSEGD  
DDPPEQAPK KKKKEKEDAPK KKKKTKKK

>EhMC1 jgi|Emihu1|43172|gw1.322.10.1  
TRASLNGNRRSVLIGINYSGLSSPSELRGCVNDVKRMRPFVERLGFPSNEGSQMVLLDDGSTPLAPTMANI  
RGAI AWLVEGAAAGDALFFQYSGHGGRIQGSDFHETLCPLDMASEGQLLDTL FETLVAPLPSPGCR LTVI  
LDSCHSAGALNLPFLFTGT EGNLKSALAGEAVQMAMSRNWL RDVIAITGCRSDQTSADVGNVDLQFDLQPT  
ARSGAGGALTSAFIEALD GREAA PSYLELLEAIRLKLAE EGF TQVPQLASSLLVDLTSAFSML

>EhMC2 jgi|Emihu1|202860|gm1.1700383  
MGAQPSLFDVHAPALDPRDVTQVFELLDKDGSGRLAGSEVTKMFAAMCGRPVKVHGAKSSYSLNEFIEAVE  
DMGRRQPFLNITGNLVKYVRENKEKMPVDAFSDERIEAVSTFLDKDKSGAIEPDELLRFLQYLHIPLFTI  
FGVNSSGVIKSNAQLQRLLRKLAKQCPQLEIEQKI IKISGDIHAGDASKPPQYQEATASAEPPEPAAGR  
KKALLIGINYTGSRMPLRGCINDVKSQYNVLTTFKGYSSSEIRLMTDDTNDSSKVPNKNMMAALKWLV EG  
VKPGDELFFHYSGHGSQCPDRSGREPDKNECLCPTDCTKGFPEYVITDDQM QNFFSQIPEGAKITCLFDC  
CHSATMGDL CVNRELGLEEDIVPSTKQVWTL SGCQDNQTSADAVIGGVPRGAFSWALMGALEDN NYKLYD  
DLLAQTRHKLRRRMGEGSGDSSHFRSAYLETSWCGSSWTALQLGGRYFCIDMRP

>Ehux1-EhMC5 metacaspase-scaffold16  
MELAAGAGVAAAAAAGGAAYLRSRRGPASGKEGTTKWQWRAAAVKERRALCICCSYPGTQWALPGCVPDQE  
AMVKTLIRNSYAVTF LADHTPAWQPKPSALSNNRNI LAELEALCRWLHAAPGRQGWVSYSGHGTQTADRG  
GDEADGLDEAMVPCDFK MAGLLTDDKLR TIRFGAGSSLMFFFDCCHSGTILDLPYTLRHTLSGPEYPIET  
EAGAI FCI SASKDDQ SAYETAEGGVCTRAFLGAYTPSVSPAATLRLMRRYAERKGMPTIMMASNRPFTEA  
DASFVEAEPEGGGGFCAAFHRCQNLGCSKGRSKAGDFGGENPAARSLELN RGEASGRGPKLHPSCPDPLS  
TTKGRAYVAARRAKLAAPP

>Ehux2-EhMC8 metacaspase-scaffold276  
MSAAVMSLQPHVFTRYEWLPKSTSGTSTKHRALCIAAYPGT SYELHGTVKDQEALKKGLEDN GYSVTFLS  
DADDKHAVPTKANILKEIANLCDWLNEEKGRMGWISYAGHGTQTKATVAGEEPDGKDEAMVPTDYPTAGLL  
TDNELNQTMLKSHKVQNGCAMIIFMDCCHSASILDIPYALETEPVGPKYVEDKSIGDIFGVSAAADDKVAY  
ETAAGGVCTRAFLIEAVRKLK GALPAEILLEMRYAKDQNM DQLITMHSNRQFTFGDFQIMKGV DVVKEAA  
PPVSAPPAPAPATAPSPAAPPGHAGYNPAAHTSHVYTAPATSKPDLTKVKGGEELNRPPAQAPPTAPATS  
GKKAGGK GAGTKPATQPQSSCCVVC

>Ehux3-EhMC6 scaffold120 440238|estExtDG\_fgenesh\_newKGs\_kg.C\_1200066  
MTDQSAAGPTTNFNLYKTGAGKTERKALCICCSYPGTQLALPGCVRDQAAMVDMLPKQGYDVTFLTDGDNY  
HEKPTKANIVREMKKLCAWLSEKEGRQGWISYSGHGAQVPDDEIQKVGYSSEKDGMD EAMVNI DYQSVGLL  
TDDELKEVLVFSKGS SLMVFMDCCHSGTILDLPYRLTHEATGPAYDVI PDCGTIFCVSAALDEQCAYETSE  
GGVCTRAFLGAYRKGQPPGQMLQKMRAYAQA KMPQ QITMNSNRPF TDADGSFIDADPASGICESLLNCLT  
GETSATRSIEIGNKQDKGQIPPSKPCTAAGKILPQPTKDYVKSIREKNGYVAQL

>Ehux6-EhMC3 scaffold111\_jgi|Emihu1|223690|gm1.11100063  
MPNSFTGMMWESKAATAGDRKVVTKALCVCCSYPSNTEVKGLPKWASTGKHALPGCVGDQMRMKDMLKKEG  
VKVRFLTDHKKLSKEKDYSTKKNIVAE LKLVKWL DGAKEDGPVRQAWFVYSGHGVINPKRPYSLLPEDAP  
DPGGHGFMLESIVPCDYFTTSELLSEVELEETLQGFNENGALLAFMDCCHSGTILGLPWDLELDES GEMV  
GCRAPHPEAIIERYSKGRILCISAALDAEVAYETKAGGVCTNAFLESHNKGDPPAKVLIAMNQYARDHYM  
KQTINMSSNVEFTDADA AVIAGGI PHWSRSLGKIMSAPAALARS LAPKQP VVERAVAF EKHPSAGAVSDF  
LYATALARHAGECGERALEIASQGASKAARLASTGKAPEEADEANTYARGLIDDGVARRRGL

>EhMC7-9 correct65 452661 471262|estExtDG\_fgeneshEH\_pg.C\_9100002  
MGGCSSSQKTTAEPEQRTPRRRALLVGM DYRGAPAGWPIINGTRNDVKVFD TLLREHWGFSEEDIVT VTD  
PAEQSTESLLAALTAFKASLRPGDTAVIFYSGHGKQVFDANGDEVTRKGESAPDIMDEALCTTNGTLLDDD  
LTVLMQGI AASAAQLFWFC DACYSGGFVDQSGSSLPEN VVLIASSLETQKSEDALRIETDKETGKMAMFY  
QGTGTRWLKAAVDGGGLPPRATHQQLFDALAAERAKDKRTSVQNP FIVASATARQLTLWM

>Amphiprora1 CAMPEP\_0186511138  
MGFLKKAFRDVFEDKKPKELKADIRMISGCEDAQTSADVSNVASFCLPDPAGRAGGACTSTLLNLLYKDHK  
DTRDDMSFVEVLTKVCIVGSQASAPLWMMDDSLRVGVAVFRRHNNRCEKIWAAVAFPKFPNXSASSPIDIS  
TTFDLVPDGATGKRRALLIGINYIGHSQGVLSGCHNDVLMVVEYIKEVHGFEEDESITVLLDDGEHDAPKE  
NILAAYKKMVAEAE PGDSL FCHYSGHGCKIRDDDRGEEEDGFDEALVPVDYQTAGLIRDDDLFDII IKPMP  
DGANLFCFLDCCHSGTILDLPLYKADGTMEVMEIDESFDFKLLGKFGTLVDGFFD

>Amphiprora2 CAMPEP\_0186511756  
XAIPAEIHMISGSHDAQTSADVFN TGQFQLPDPAGRAGGACTSALLKTYRLEEQQGGANGKVSQVLLRTM  
RGE LRQMGYDQVPQLTSSRLIDVNKPMYVPPDFKPAAGRKRAILIGINYVGQQQLSGCHNDVKNIKKYL  
TEVQGFNESEMLILMDDGNHHPTRKNIIDAFKRIGEYSNAGDVV FVHYSGHGGRV RDTSGDEDDGYDETL  
IPVDFQRAGQIVDDDILKILVKPIKAGVYVTVLMDCC HSGTVL DL P YRF SADD SQMRI DQGFNMNSMLGKL  
GGAADVAACACLG LCV AQLLADILAG

>Amphiprora4 CAMPEP\_0186484142  
XMRFRSSRRHGQNGAGETNTS QKGS AQQFSQQVQHLIPAEVRMISGCHSEQTSADVVESTSRDFSLLPNP  
KKGAGGACTSALLDILYEHHRSSLSFQQLLLQLRSALAQRGFDQIPQLTSSRPLEMQQTPFSCISPYEG  
NPQTPHQQCRRALLVGINYRGQSGELSGCQNDVYRMRDYL CQVQGYLPSNVVLLVDDGKAHYPNRKNII S  
VLQQLVLQSTSGDSVFFHYSGHGGLLEP SLCNNAWKRSVEDYDEILYPLDHKQAGHIRDYSLFRHFVKPMP  
AGVTVTCVMDCC HSGGVLDLPYSYKATPGGTIAMERSMGLNLLALLYLLAGGRLPGGGLFHNVS DSIQGV  
TGESVESLQGAGMTEEDAQDGITDFTGDNGGDVVAESIENDITADDLGDDDIAPGDLGENDIGADDLGEND  
VGTEDIARTGDFPEPMPDPDLPLEPPVFD TNGNPI SDTGLDGP I GAPP I FDSNGDQYGGGDAVYDTNNVPG  
YDDNRMAGFAGNSDLGFMQASPYGYDQGGRAEY EYGGT DYGGMGDNGEDADCDCGGCISELLQNLADDE

>Amphiprora7 CAMPEP\_0186516142  
XTLRDTKDQHRIQTSIMPTREEVLAKAE EYIPATVRMISGCRDEQTSADVSNVASFCLPDPAGRAGGACTS  
SLLQILYADHKKPEVDLSFQETLLAMRKVLSAKGFSQIPQLSSSRPLDINQTFDLVPPEHVSGTRRAVVVA  
INYVGQQGELRGCHNDALNMIEYIKDVHGFPEENITVLMDDGQHT EPT RDNILAAYRKVV R DSEPGDVVFT  
HYSGHGKLRDQDGD EKDGYDETLVPVDYASSGQIRDDDLFKYLVAPMAAGVMTCLMDCC HSGTVL DL P F  
EFVADGEQTEMHVKPDFDPQTLINL FQAFQTF SNGECS PETLMEQAQMLKGCN I L

>Amphiprora8 CAMNT\_0029300213\_6  
YTNISYCFACVVT TTTTTRSIHNMGSGNFDDKVHKCIPAEFFMISSSQDSEISNEAYNTGSFELPDPAGKA  
GGACTSAILEVFYSRGHEVGGMSWVDVLKDMHEQLKKQKFDQVPQLSSSRWIDVNQPMFIVPPKSGVRRRA  
MLIGINYVGQKQKACHNDVENVKDYLIKAQGFRESEMLILKDDGRHEMPTKQNI MDG FVRLTQYSQPGD  
VVFVFSGHGGRVVDTS GDEDDGFDES LIPVDFQEVGQIVDDDILDI FVKKMKGGVTCTVVMDCCHSGSVM  
DL PYYFSADGKEMETEKNFQFGSGGTDGEVPPKHKRTFDKHGKAVKVHEKEEQDKAEKKAPKRTVHEAPIK  
KIKPRAPPRDRKPPPPPPPPQR

>Acoffeaeformis1 CAMPEP\_0186537396  
MSVEEQAE EAI PAVVRMFSGCEDRQTSADVSNVGSFQLPDPAGRAGGALTSALLNTTYADHANTGADLTFK  
ETLITAREKLRREMGEFQVPQLSCSRATDL DQPF SII PPDFEGTRRAVMIGINYVGHDPGELSGCHNDVFN M  
AEYIKDCHGFTDDDIVYLLDDGEHTPPTAANIIEAFQTLASQAQPGDACFLHYSGHGCSIPDQDGEDDDGK  
DEALCPVDYAENGI LRDDHVLQMLVAPMPRGVTLT C I MDCCHSGTILDL PFLFLADG SQEEMEADPDFEFG  
PFLTVMVSSFAAAGLEGLKQLHAEGKARRKKRRQWLKSR LGF

>Acoffeaeformis2 CAMPEP\_0186537718  
MAEDLIRAEVRMISGCRDSQTSADVSNVAEFQLPDPAGRAGGACTSAMLQVLYADHQT PEDDL SMQEVLLQ  
MRDILRSSGYTQIPQLSSSRCLDIHTPFRLVPEDFSGTRRAVVI AIN YVGQQGELRGCQNDAHNMIEYIKN  
VHGFEDENILILMDDGIHPDPTYENIITAYRQLVASCEPGDAV FCHYSGHGKLVDE DGEEDGYDETLVP  
VDYQSAGQIRDDTLYKELV GALPEGVMMTSVMDCCHSGTVL DL P YV FVADG EEEEMHENPGFDMNAMAGFA  
SAAGIAMALASGADPIEVAMQACCAIL

>Acoffeaeformis3 CAMPEP\_0186529544  
MGRFLKKLAKLKDKVEDRIADFREEEPAARAAFEDAKPEAMKNDIRMISGCEDAQTSADVSNVNSFSLPDP  
AGRAGGACTSTLLNIIYADEKVPEDDLSYTVLEKMRANLKKKGF S QIPQLTASNPI DVNTDFDLVPPAAT  
GTRRAVMIGINYVGHDPGELRGCHNDVLMNKYIMAVHGF AEENIQVLMDDGEHTPPTKENILAAYKKVIA

ETQSGDAVFLHYSGHGTKLRDDDDWKEEEDGYDEALVPVDYQEGAGMIRDDDDLYEILVKPLAHGAHMVSLMD  
CCHSGTILDLPIYIFKADGTDQEMHLDP TLNLDGLIQSFGGHVTNLMSKFKFFK

>Acoffeaeformis4 CAMPEP\_0186534122  
MSSFNEKVINTIPSQVFMISSSSDKQTSDEAYNAGAFNLPNPNKGQGGACISSLLQVLYERGHEKGSMTWI  
SCLEDMWQQLKNLGFQVLPQLSSSRWIDVYRPMYIVPPNSGKRRAMIIGINYVGGQQLKACHNDADNIKD  
YLINAQGFREEMLVKDDGKHMMPKQNIIMDGFTRLTQYSQPGDVVVFVFSFGHGGRVVDTSGDEEDGYDE  
SIIIPVDFRENGQIIDDLLDLFVKRLKGGVFCVVVMDCCHSGTVMDLPYAFSANRKKMAIERNFPFDDDDK  
TRKRAFKNQKHAERRGDASMAGDDKTVSTTRTKPKKKQRPKPSIREMPIEPVPPRPPRRSVPPPPPPKQC  
CTIM

>Acoffeaeformis5 CAMPEP\_018654023  
MSLEQAQQAIPAVVRMFSGCEDKQTSADVSNVASFKLDPDPAGRAGGALTSALLNVTYADHKDTGKDLTFKE  
TLYAVRTSLQGGFEQTPQLSSSRPTDLEEHFAILPKNFAGKRRAVMIGINYTGDNPGELRGCHNDVHNMK  
EYIKNCHGFTDADITLLDDGKNTAPTAANILAAFKKLASEAKAGDACFVHYSGHGCSIRDDDGDEADGMD  
EALCPVDYKKSGLRDDDVLEKLIAPLPRGVTLTCLMDCCHSGTILDLPYLFLADGMQEQMQPDPDFDFGP  
LITMVSSFAKLGFEGLKHLKQKVRKKERQWLKNRLGL

>Acoffeaeformis6 CAMPEP\_0186520996  
MSSIDERIKQAI PAEFHMI SSGSADSQTSADVQNTGKFQLPDPAXXXXXXXXXXXXXXXXXXXXXXXXXXXXX  
XXXXXXXXXXXXXXXXXXXXXXXXX RAGGACTSALLQVWYRDGHATGEKTWVQCLREMRSNLLQMGFDQVPQLTSS  
RMIDVNMKIMHIVPPGSTGRRAVLIIGINYVGGQQLSGCHNDVNNIKKYLIAAQGFKESEMLILMDDGRHH  
APTRKNIEDAFRRITEYSNAGDVVVFHYSGHGGRVVDTSGDEEDGYDETLIPVDFRSAGQIVDDNILDMLV  
KPMRAGVTVTVMDCCHSGTVLDPYRFSADDSQMRDLQGMNMDNFLGKLDPGSVALCACLGFMMMNMLDF

>Acoffeaeformis7 CAMPEP\_0186541908  
MGGDFEGKAHELIPADVMI SGCQDAQTSADVGNVATFSLPDPAGRAGGACTSALLKVLYQQDGTESFSFV  
DVLMMRMTVLRSGSYPQIPQLSCSRKMDVQEKFTLVPESSTPYGSKRALLIGINYVGGQELRGCHNDVG  
NIKRYIMDVHGFQEEIDIVLMDDDGNHELPTYDNI IAAFRRLVNDTESGDCAFFHYSGHGGRLPDDNGDEED  
GYDETLIPVDYQSAGQIRDDLLYSDLVGRMPEGSTLTCLMDCCHSGSVLDPYTFQADGEQQEMGENPKAN  
MGRQLQAMAVGFLVRKIFGTGPAAQMVMSLATSGLAMAQSGGSSGGQKTGGANNVLLPLLX

>Aglacialis1 CAMPEP\_0199875840  
MGFLSRMKKRIEERFDEKQGAVIPADVMI SGCQDSQTSADVWNVQSFGLPDPAGRSGGACTSALLKVLYA  
DHRKLDLDDTLFVEVLDKMREILSEGEYTQIPQLSSSRAMDLELPFHLVSQQEDATDKRRALLIGINYVGHE  
SGVLSGCHNDALNMKEYIMDVHGFEEENITLLDDGEHDPPTKENILNAYKKLVEESEKGDVSFCHYSGHG  
GSTRDDDRGEEEDGKDETLIPVDYKTAGIIRDDDLFDTLVHPMKEGVTLTCLMDCCHSGTILDLPYTFKAD  
GSGNVDMSIDDDFNFDKLFKKIGEVFD

>Aglacialis2 CAMPEP\_0199894872  
MPSIEEAIPANVRMISGCRDEQTSADVSNVATFSLPDPAGRAGGACTSGLLKILYADKHKPDDDL SFQEV  
LNLRDVMSSGRFTQIPQLTSSRPLDVHTPFTLVPDECTGTKRALLIGINYIGQQGELSGCHNDVLMVEYL  
KDVWGFEEHNITILLDDGEHTNPTRSNILSAYQQIVAEAESGDVAVYCHYSGHGGRLRDDDGDEEDGYDETL  
VPLDYQRAGQIRDDDLFNILVGPMAKAGVLTVMDCCHSGTVLDPYCFVADGEQEEMTLKPDFDMEKLMG  
LAQALMAASNGDPMALAQACCTIL

>Aglacialis3 CAMPEP\_0199871010  
MVDGAFDSQAIEAIPADVMI SSGSHDKQTSADVSNVGFQQLPDPAGKPGGACTSALLKVLYKDKHAAAPM  
SWVDTLQRMRSILRGMGYDQIPQLTSSRMIDVKSTMYIVPPGSTGRRAVLVGINYIGQQGQLSGCHNDVH  
NIKDYLINVQGFKEQDMLILMDDGRSHEPTRENILKSLKRVTEYSEPGDVVFFHYSGHGGQVRDTSGDEED  
GYDETLIPVDYKRSQIIDDLLSDVLVKSLLKGVTLTALMDCCHSGTVLDPYRFDADGSDAMIRDEKMDF  
GKFLDSASEVVGCLLCLYICILGLVSDF

>Caffinis1 CAMPEP\_0187013496  
MPPQLEKVKREIRFQDQDTTIPPGGEYDLATADSPSENLLFDEIVEKVYPAEILMIGGCRDSQISVEVDAP  
GASLASMLSSGGETHHSKEVSINLSQLRNTHFRLPNNIDGRSSGVCTKAFLSCLQGNHATVSWFQLLKS  
MQIHLKGYNQDPQLSSSRLIEVDQPFIEVRNKNGTKRAVMIGVNYTGQKGEKLSGCHDDVESITSYLIESHG

FEKENMTVLMDDGIHEPPTYRNIMVACRAIVRESKPGD TVFFHYSGHGGRIQDINKDEADGFDETIIPSDY  
FRAGQITDDDLNKTTLVKPMKGGVYVVALMDCCHSGTVL DLPYVCTEGSHMTRQTQLNLDLKKTKFCGFFYS  
CIRAN

>Caffinis2 CAMPEP\_0187019438  
MTSEQAQN AIRSEFRMISGCEDEKQTSADVSNVGSFQLPDPAGRAGGACTSTLLNVLYRDKVRPDDKSFKEL  
LLEMREILQSKDFTQIPQLSSSRNL DVDTKFDITPDGFHGTKRAVMIGIN YVGGEGELAGCHNDV LNMKEY  
LMDIHEFEEENMTILMDDGVHPDPTRDNIMYAYRKIVAESQAGDVVYLHYSGHGGKLRDDGNDEEDGYDET  
LIPLDYQSAGQIRDDDLRLTLVPMQEGV FVTSVMDCCHSGTVL DLPYNYQGE GDSMQEQDFKYDAAFSIL  
GALATGNTSAAASVAMDECCTVS

>Caffinis3 CAMNT\_0029934239\_2  
HKSTLLIFHNSHKRLTSASNLYFIYNKKRKNIKTKMSYPGNRRPQNRPAQPQKQNSVGFNGQPTQFDEMAI  
KAFPAEFQMISGCHDSQTSADVSNLNSQFSLPNPQ GKAGGACTAALLSVLYDSHRNGTFSSMSWVTL LRS  
RQNLLNKGFDQVPQLTSSRLIDV NKPLKLVNDDANASYGTRRAVMIGIN YTGQQGQLSGCHNDVKNMIEYL  
KSYQGFEEDRNMTVLMDDGYHHDPTYYNIMDAYRTVVRESRPGD TVFLHYSGHGGRRV RDTSGDEDDGFDETL  
IPVDYQRSQIVDDDLCTQLVKAMPQGV LVTSLMDCCHSGTVL DLPYRFTADGDAMVRQNEFD FGDIAVVA  
LAACCLFDLLCCLCSALGGMVDGFD M

>Ccurvisetus1 CAMPEP\_0187040390  
MDAEQQIEFDTKAKEQIPASIRMISGCRDSQTAADVTDLGSFSLPSPDGRSGGASTAVFLK TLYDAKNDGT  
LSSLNWVDLLQAMKEKLDGKGY SVPVQLSSSSMMNIKEPVK FVNDDPNGTKRAVLVGIN YVGLPGQLSACH  
YDVKKVKEYLITELGFEEKNMIILMDDDHHTRPTKYA IILTAYRRLVEESKAGD TVYCHFSGHGSRV VDTNG  
DEDDGYDETLIPVDYF RAGQIVDDDLKLFVKPMAKGV LMTCMFDCCHSGTVL DLPYFNA DDDEKMQRL  
SDFKFKKKYLWCRLSVAFRFVYSPVSGSSYV VNSLEKHMVKIFVSDTALPGILYL

>Ccurvisetus2 CAMPEP\_0187047062  
SADVSNVGSFNL PDPAGRAGGACTSALLNVLYADKKK PDDDL SFKQVLLSMRDLGSKNFTQIPQLSSSRE  
LDVDTKFDITPDGFSGTKRAVLIGIN YVGGEGELAGCHNDV LNMKEYLMDVHEFEEDNMHVLLDDGVHEDP  
TYDNIMNAYRQLVSSSVEGDCVYI HYSGHGGKVRDRDGD EADGYDETLIPLDYMNAGQIKDDDLRLTLVIP  
MQRGV FVTSVMDCCHSGTVL DLPYVFKADGEHDQMEHDEDYDFDPMMSILGDAGMI GTGLAVAAVA DSEC  
CTIS

>Ccurvisetus4 CAMPEP\_0187051206  
LITTKGKMNDFDQKAEQAI PADVHMI SGCCHDSQTSADVSNVGNFQLPNPQGRAGGACTAALLQ TLYDAHRN  
GSLPTLSWVTL LRSRMTNLLNKGFDQVPQLTSSRMIDVEKPVQFVNDSNNYGTKRAVLIGIN YVGGQNGELS  
GCHNDVKNMKEYLMNVHGFPE SNMTVLMDDGYHLNPNTRYNITNAYQNLVRQ SMPGDSV FCHYSGHGGRV R  
TSGDEDDGFDETLIPVDFQSSGQIIDDDL FKNLVQPLPKGV LMTCLMDCCHSGTVL DLPYRFTADGDVSAG  
MQRIDGDFDFDELLMIGLICCLPDL LYCFGDLFGCLYGLLDF

>Cdebilis1 CAMPEP\_0200872066  
MIYQQRYSILRHRIRRP SLKEAFVATAIFSCLLLLVPFLHKASDDNILETQEKGAPTQTVNYVSSLVVG  
YPSTSPPYNSTVEFII SPKDPSCIEDPGHLFYYPFAEEADDPDPTIYNCTWLANTRRPNLICDYEIFNTGF  
ENLQPAREVCPVTC DSCYLLHPSAVPTPTPSFSSHPSSEPSVSARPTLLPSTEPSGSPTS IPTQRPTACPE  
DPDAIFFRTELE DATKPIFHTCKELSEFKYPENTCKFLTQSWTEEIEEDQKPI SINYYYPAKDICRNTCS  
TCVIESPNPSNGPSISPSRTPSKFPTQNPSEVPTIPGIPSPRRTPNPSITPSKNPSLRPSNSPTGT PKIVE  
FDLTMTFVKDPND SAPNEDFNEEPLTEVVTETLMSSFENQKDGNF EVVSRVKSQESFGERRYLR LQSSGSQ  
SQTILSRRSGSNRSRQLQVSGQRVIFLIVVENNSGRSLKSIKNASENTFESEESQRKFLKELRNRDSSFVI  
YNGVVSTDEVKPSLTPR VAVTKRKAWIIVLSVVLGVSILLV LILLGLLYLFKRKKDEVKKEIEGNDKI  
DTVMPPPPSITDLSIPPDPKFPPTNSNDNENAF LISNDSPKQEHNTETS DNGEIEQANSSTTEATGDGE  
SALDSDSGMQPNADSIQ PSEPIGPSVSDTSNAQKDRDKNVGMRERGYNSYSEYSSQDDYSSDSDSYEDSLSG  
SDFRYGDNSEESVTR SDESLVSLKCTVHMI SGCRTQTSADVDEVGKFC LPNPLGKSGGACTAALLQ TLYD  
FHGSEKTRSLTCSWAGILL SMRENLSQGY SVPVQLTSSKPINVNDTFHISNPWKYGTKRAVLIGIN YV  
QEGELSGCHNDVIRIKDY LINFQGFEE RHITLLMDDGININPTKGRIIRAYRRIVK VSKAGD TVFCHYSGH  
GGRTKDL DGD ESDGLDETLIPMDYQSAGQIIDDDL FKELVQPMSEGVHATCLMDCCHSGTVL DLPYHFTA  
SDASKGIQRGRAPHSSYREIRQNTQKKPEI IPLPAKNMKNPRVGKVKPSPGTGHEFD DVFRIDHACISPEL  
HLPPMISEGKIAITVPSGPLGFATVDNPTNGIRASEVFAMKQSSILAGKIRNGDR LIALDGI DTSSSLTAAE



VTKLIISRSSKSRDMVFRSDRGKPTDMRTIDEGSVSSHGINDYTCCKTGTSELTKLIDGVAEHEAVSVISV  
ASEDNESVCSMISC

>Cdebilis2 CAMPEP\_0200886990

MSDFDQKAEQAI PADIRMISGCQDSQTSADVSNVGNFQLPNPQGKSGGACTAALLQTLTKVHREGAEISWV  
DLLRAMRDNLLEKGFQDQIPQLTSSRMKIVESPLKIVNDTDVYGTGTKRAVLIGINYTGQQGELSGCHNDVK  
NMKEYLITVHGFEEQNMLILMDDNYHPNPTRMNVLNAYRNLVRESKPGDTAFCHYSGHGGSVKDYSGDEED  
GFDETLIPVDFQRSQGIIDDDLFKELVRPMSTGVLMTCLMDCCHSGTVLDDLTPYRFTADGDVVSQGMQRISGF  
NFDDLLVVGVFVCCCLPDLGLGCLFEILG

>Cdebilis3 CAMPEP\_0200879288

MFSEKAEGAIPAEFRMISGCQDRQTSADVSNVASFRLPDPAGHAGGACTSAILNVLVYADKHKPDDDLTFKD  
VLMKMRDMLDTKGFQAIQPLSASRDIDVDTKFDITPDDFSGTKRAVLIGINYVGQDDELAGCHNDVLMKE  
YLMDVHEFEEDNIHVLLDDGVHEDPTSENI IAAAYRRIVAESVDGDCVYCHYSGHGGKVRDDNGDEADGYDE  
TLVPLDFQEAGQIRDDDLKTLVIMPRKGVFVTSVMDCCHSGTVLDDLPTFKADGEQESMQHDESFNFDPM  
MGILANAALGGAAVVVAANECCTIS

>Cdebilis4 CAMNT\_0047068781\_6

KQFFHIIYSISSSSIMSEFDKKAENIPAEIRMISGCKDEQTSADVGNVTSFGLPDPAGRAGGACTSAIL  
KVLVYADKKRPDKDLSFKDVLLKMRDVLDDKRFEQIPQLTSSRNLDVDTKFDITPDDFNKRAVLIGINYV  
GQNGELAGCQNDALNMKEYLKDVFHDFKDENIQLLDDGTNTNPTKRNILKAYAKIAEESDAGDVVYLHYAG  
HGGHKS DRGGDEKDRDETLPVDFQKQWGVGEILDDDIYQKLVKLKKGVFATSVMDCCCHSGTVLDDLPHYK  
VGDGKQEGGMNANEGFNFGTAKGGCIIIL

>Cneogracile1 CAMPEP\_0200990868

MISGCEDKQTSADVSNVASFKLDPDPAGRAGGACTSAILNVLVYADKKKPDGDLDFKDVLLQMRGMLDGKGF  
QIPQLSASRNLDVDSKFDITPDNFSGTKRAVMIGINYVGQDDELAGCHNDVLMKEYLMDVHEFEEDNMMI  
LMDDGEHVEPNQANILSAYRRVVALSQPGDVVYLHYSGHGGKLRDDNNDEEDGYDETLPDYNSAGQIRD  
DLLLLRILVLPQAGVYVTSVMDCCHSGTVLDPYFNFKGDGEQESMNESENFDSTPMGILSTLTSNASLMN  
SVASAAEECCTIS

>Cneogracile2 CAMPEP\_0200992636

MSNYPGNRRPQAEKQQSIQYSSNATGYDRQAEETFPAEFHMISGCHDSQTSADVSNLNTQFSLPNPQGRAG  
GACTASLLSVLYEEHRKGSIDSLSWVNLRLNRMQDLLNKGFDQVPQLTSSRLIDVKNKPLELINKSSDAAYG  
TKRAVMIGINYRGQGGELSGCHNDVKNMVEYLKKNKQGFQESNMTIMDDGYHTNPTYSNIMNAYRTLVRTS  
QKGDVTFIHYSGHGGRRVRLNGDEDDGFDETLPVDFKQAGQIVDDDLCKELVKAMPQVLTSLMDCCHS  
GTVLDDLTPYRFTADGEAMVRQDQDFDGDVIGGVVAMCCCFEIMLND

>Cneogracile3 CAMNT\_0047211831\_3

IMDQSTDNNDEHANDTSHNHESNNAMFHILISACDSDTAADVSDINSQFSLPNSQGGKSGGACTAALLNLY  
AAHENGITDSMSWVGLLKEMRKDLIKKEYDQIPQLTSSHRIEVDKPKIVNDSPDSMSGTKRAIMIGINYV  
GQQGELSGCHTDVKNMRKYLVEVYGFKKSDIIVLMDDGIHNNPTKHNIMKAYRKIVRDSLPGDVFVLFHFSG  
HGGQRVDLNGDEDDGYDETLPVDFQEAGQIVDDDLWVELVKAMPQVLTSLMDCCHSGTVLDDLPHYQYAA  
DEDNVVSSGDCSDNSTGSLQDDQSPETPETAAASSTVSEARLYELITSKNWKRAEEFLDDKSTFNEEEKL  
ENLQYQDSNGYTPLVKAVLKKSAVSLIKTMINLGKRETLEVTNDSDNVNLHWAAYSNNVSLVFKLILEK  
SNRDVIYAKNNYDKTPEILLNRNKAAFIDKTLALLVKEQLLSDQKTTVDRLCTSWSTIKTLAWAHLPE  
EKDIVLERPLFKAILNSTFICPRYIFISMMDLYMQIALVLFVFFLRNIIQSSTPFLSLIILVVCVWF  
LIREMTELMLTYLKNYFLEPTNVDIIQFVLLAGSIVIIFASGIDDLNPLSTIDHAFVISATCVAWLKLL  
FVVGNLVYNGAVFANGVITIIIGKIVPFLFTSAVLLLMFMSHYLMWAGHYFCSQFFKSDDEWTCNLPSY  
HETFSMFLGLNSEVQVSTFAISYVYGFISILMMNILIAICYSYAKVLESGDRTFWRNRLKFAECQCF  
NMFCCAERHNRIRNESTRYGRIDSEIITNFDLNVQDGDPPQDNGPQVHILKNDRISFGTHDWSIYNKKIG  
ANDKREFFGWVWETSVTSTPSLRIRLKYFFSRALWEDIICPGQEFENILLGIQYNKSGRGLRFFVRLVCY  
VLIPFSLIIILMFCFGSVSFGLLWHRKMRHLFAEDTNKFKSEQVEARDTLKEEIFIELQEYETNINDSL  
EQLVRKHEEKIGKQFAILSKKQKMNFKQNEHEYRFVDIDEHLSDIKKMLSEMGNK

>Cpennatum1 CAMPEP\_0200351432

MSFQEQAEKLIAAEVRMISGCADSQTSADVSNVKEFELPDPAGKAGGACTSALLNILYNDGVAAGEMSWVD  
MLRRMRVELQGDTYQVPQLSSSRQFDLSNTFEFAKTGYGGTKRAVLIGINYVQSGQLSGCHNDVLNIQKY  
IMDVHGFQEEENIEVLMDGGYHTSPTRHNITVAYQRIAEVVSQSGDAVFCHYSGHGGKLPDDNGDEDDGYDET  
LIPVDYEHAGQMRDDELLQRLVPLRAGVTMFSLMDCCHSGTILDLPYRFRADGDTEEFQEEESGYNFGGYM  
GLLGESAETVFCCFMLLKFFVWDMVM

>Cpennatum2 CAMPEP\_0200351262  
MPFSFNGAFQNLKDRFDDDDDEPSYEERATNMI PATVTMLSGCKDCQTSADVVDVKSFGLPDPAGKAGGAC  
TSALLKLLYHEEQVPDDDLTYVEVLNMGMRDNLNDNYTQVPQLSSSRPFDLTPFVFAEGIGTRRALLIGIN  
YGGQNGELSGCHNDVINIKGYIEKVHGFSEDNMTILMDDAEHEEPTKRNILKGFALVKSCAEAGDSVVFVHY  
SGHGGSIKDDDSGEEEDGMDECLCPVDYALNGVIRDDDVYSTLVAGMPPGARVTCMLDCCHSGSILDLPLY  
YTAGSEECCLKENEKFKFGKLFQLLGNLAEDFLDLF

>Cpennatum4 CAMPEP\_0200356122  
XTQKPDAMASTGNFHQQAVELIPATVRMISGCHSEQTSADVSNVASVAQLPSPAGRAGGACTSALLDILHR  
TPPGSLSFQDLLGQLRQNLNSNGFDQIPQLTSSRSLDVGRTPFHLVGGSGQRRRAVLVGINYRGQSGELSGC  
HNDVFNMKKYIMDVHGFQERNILVLVDDTRHPITRQKIIAALEALVANSVAGDNVYFHYSGHGGLLEPEA  
NLFKLGGGDTYDETLPLDHTRAGQIRDYSLFNRFVKPMAAGVTVTCVMDCCCHSGSVLDLPYSFQPTPGGG  
IRSVQNFDAISNLAFLYVLAGLLPSAGFGDIAANIGDQVGGDISDYQGAGIEAEAQDDEAYEGDGPDPFGD  
FADGDGAPDDFGPGGVPDDPGGYEMGGDRGFGGGDAGEGYDTGDGDRGFGGFGMRTRDVGDDGDEGPGFGG  
FDMAGGDDGFGMAGGDMGGDDGPGVDCDCLIDSINSLLETTGEEE

>Cpennatum5 CAMPEP\_0200357564  
MTFQEQAEKLIAAEVRMISGCADCQTSADVSNVKEFELPDPAGKAGGACTSALLNILYNDGVAAGAAEMSWVD  
MLRRMRVELQGDTYQVPQLSSSRQFDLSNTFEFAKTGYGGTKRAVLIGINYVQSGQLSGCHNDVKNIKRY  
IMDVHGFQEEENIEVLMDGGHHTSPDRRNIMEAYARIAEESQPGDAVFCHYSGHGGKLPDDNGDEDDGYDET  
LIPVDYEHAGQIRDDELLKKLVLPLQAGVTMFSLMDCCHSGTILDLPYRFRADGDTEEFQEEGGYNFGSYM  
DLLGDSGATVFCCFMILQWVMSMLW

>Cpennatum7 CAMNT\_0046377579\_4  
KSEGSQASKKREVINSRYPCVSTLLLLIPSNRSFSLTIQPINIPL\*PRQIFNMPISFNDQFRKLKNRFD  
DEDPSLEERATVMI PANVIMISGCKDAQTSMDVFDVGFDPNPAGKAGGACTSALLKLLYNDEVVPDDDL  
TYVEVLNGIRDNLDDDYTQVPQLSSSRPFNLEKPFVLAEGEGTRRALLIGINYVGMGDELGDCHNDVLMNK  
SYIEKVHGFKNSNISILMDGKNRHANPTKKRILRNFKKLVRECEEGDSVVFVHYSGHGVSRLDKDRNEKDG  
MDECLCPLDYTAKGYIRDDDIYSTLVAAMPAGVRMTCIMDCCHSGSILDLPYAYKAKTRKNGSEQSKKLT  
GYAKSSVFEENKFKFDKLFKCLGNLTEDFLDASDDSDVSD

>Cpennatum8 CAMNT\_0046377197\_3  
LPTQKSDTMASDTDNFHQQAVDLIPATVRMISGCHSEQTSADVSNVASVAHLPSAGRAGGACTSALLDILH  
RAPPGGLSFQDLLGRLRQHLGAGFEQVPQLTSSRSLDVGRTPFHLVGGGGQRRRAVLVGINYRGQSGELSG  
CHNDVFNMKKYIMDVHGFHERNIIVLVDDTSHVPVTRHRIIAALEALVSNVAGDNVYFHYSGHGGLLAPE  
ANLFLKGGGGDDGYDETLPLDHTRAGQIRDYSLFNRFVVRPMAAGVTVTCVMDCCCHSGSVLDLPYSFQPTP  
GGGIRSVRNFDSLNLAFLYVLAGLLPPSGFGDVAAHIGDRVGGDMSDYTGAGIAAEAQDDEAYEGGDPD  
VGDFADGDGAPDDFGPGGVPEDPGGYEMGGDRGFGGAETGGGEAGEGYGMGEGDPGFGGFGMTRDVEGD  
DGGPGFGGFGMAGGEMGGDDGGFGMADLMGGDDNDPGVDCDCLIDSINTLLETTGDEE

>Dbrightwellii4-1 CAMPEP\_0193954124  
MGWLVKKIREFKEEQKAHLIKAEVRMISGCDDSQTSADVSNVSMFELPDPAGKAGGACTSAYLSVLYKDKK  
ASGAELTFVEVLQKNEGSSPEKKYTQIPQLSSSKPIDLNEFPQLVPDTATGTRKALLIGINYTGMPGELT  
GCHNDVKNVKEYLMNEHSFKEENITVMLDDNVHESPTKANIISGYKKLTKESQPGDAVFCHFSGHGSQIKD  
DDWFEEDGLDETLPVDFKENGQIRDDDI FDIILVPMKEGVTLTCTFFDCCHSGTVMDLPFTYRADS  
SSQ MVLDKKLDGKVFREVGDFFNKKEETNAK

>Dbrightwellii4-2 CAMPEP\_0193979726  
XQAI PAEVRMISGCADAQTSADVSNVNFELPDPAGRSGGACTSALLKVLYTNKKKPD TDL SFRDVLQRVR  
DILAEGKYAQIPQLSSSRPFVKTTHFALVPKGEHGTTRRAVLIGINYTGMPGALTGCHNDVHNKHYIMD  
VWGFKEEHITVLLDDGKHKPPTANILGAYAALAAKCPGDVAVFCHYSGHGGMLPDDNGDEDDGDFETLIP

LDFKRTGQIRDDDLFKILVVPKAGVTLTCLFDCCHSGTVLDDL PYNFQADDHEFTEEKNYKFTPLLSIAAE  
LKANCINCTNPADPAANCTVS

>Dbrightwellii4-3 CAMPEP\_0193978290  
XFPLKDKNIHFLSIGTCKMGNDNSREAESTPEVAEFRMISGCQDSQTSADVSNVNEFELPDPAGRAGGACT  
SALLKVLVYHDEKTPEDTYSFVEVLKMMRDELSEGEYTVQPQLTSSSTIIDLNEPFDLVPEKSTGTRRAVLVG  
INYVGMNGELSGCHNDVYNIKKYIMDVHGFEEENIVMLVDDGCEMPTRENMMNAYKWLVESSEAGDAVFT  
HFSGHGGQLRDQDGDGDEADGFDETLIPVDYLENGQIRDDDLVDTLVKPMKVGVVVTSLMDCCCHSGTVLDDL P  
YTFRADSDKFEMEMEEGFDLGLKLLGKIGA

>Dbrightwellii4-4 CAMPEP\_0193955922  
MADFDTKAKAAIRAEVRMISGCHDAQTSADVSNVGSFQLPDPAGRAGGACTSALLNVLYRDHQASEDLVSW  
DTLRQMRREILSSKDFEQIPQLTSSRYIDVNETMQIVKGHGAKRALLIGINIVGQNGELSGCHNDVNIKEY  
LMDVLGFEEEDNIMVLMDDGIHHEPTRDSILSGYRRLVAESVAGDTVFCHYSGHGGRLVDDDDGDEDDGYDET  
LIPVDFEHAGQIRDDVLFNEFVRPMAEGVTVTCLMDCCCHSGTVLDDL P YRFVADGDDVQMRADESVDFEGFL  
GPAFWTAGIIAASSLGGGGGGVGEIFGAIMIAAGVYVGLSWIPVSVYVGVYVTV

>Dbrightwellii4-5 CAMPEP\_0193981564  
LTFQDLLLQLRSSLNSGFDQIPQLTSSRPLDVQPCPFHLVGGTGARRALLVGINYLQNGELSGCFNDVY  
NIKKYLQNHGFGAPKDIVLMDGKHSFPTRQRIIQELKKLVSCSIGGDSVFFHYSGHGGLLDADGFNLFK  
AANPNAKQYDETLYPVDHGTSGQIRDFSLYSHFVQPMKEGVFVTCLMDCCCHSGSVLDDL P YSFQPTSGGGIR  
TGRNLDLTLNLAFLYVLGGMLPSHGFENVNTHIENNVDGTLDDYQGTQVEQLEMDDVACEEAQFDDPEGV  
GYGEGIDDDVEYGHYDDFGDDDDTEERFVGNVDGDDVGEYMNDPDPNPMGSPGFDGGPPPFEDDAMDG  
PLSRPMEYDQAPPDIVQGTFFVDDGDRGGEFVGGDDFAEDEAVNYFPPQEEVQGGFGEYDDAGGDDAEIDC  
GCLGDLMSALMEDEE

>Dbrightwellii4-6 CAMNT\_0038558635\_2  
ITPSITSSMFSYPGQKRRPKRPTGPPPLSLSLRFWDYDTRGGSLDREEVSAALLHTPPFNHRGADS  
VRETVYSVWAAFDDHDSGSIDKREFCAPGGLGESLLAYTTQHHQPPPKPAHTYPPQTTHTRPPQTYQPYQ  
PATNTTQSNDDPIYVPAYGSNNQTHQETHQHNSPAPSAPPVYSSGSNTWNCQNTFANSNTDPRCQMCNA  
AAPAGIAAHNHQPPAPAPYHQPPAPAPYHQPPAPAPYQPPNHHHQPPSYQQPTHHQPTRHQHTQQSPQYQ  
TMRINIPAGTVPGQRLKIKTPGGHEHMTI PERHQWHSQHPPVFDVQVPVAPAVVVQAAPIHNPTPSGGHY  
APAPPPKPAQTPWQSWESFRGHTFQQVPMATTNVPHEISHSSNIPASGRRKALLIGINIKGTRAAALRG  
VNDAKNIKNLLMENGFRDDPTHMVMLVDEGARNSNYLPTRANIMRGFQWLQVGVSEGDALFFHFSGHGSQV  
PDKSGFEEDGLNETILPVDYQKQISDDVIWSSIVYPLPSGVKLTVMDCCHSGTGLDL PFDYMLDSKRWV  
EDTNPAAHSGKHVVSFSGCEDSQTSADTIEKYQAGGAMTQSFISAYRQNPMTYPEFMAAIHRRLLKQRFKQ  
RPQLTSSQAFDVKNVTFVSTEGFQPNKNQVIGRIQRKKIRPGSTGDRRQSGVNDLLFGGLMVGALAFADA  
LFG

>Dbrightwellii4-7 CAMNT\_0038593613\_3  
ALGLRNNSKRISHIKANILLDSLTKHPPTKPTHTTSLPQAHQSAYSHQGVNVSTGSAPQLQTS HQSEHNH  
HHTMMMSVPHTTMRPPHTYHSTHSHQGVNVSTGSAQQLQTYQSHQSEHNHHTMMMSVPHTTMRPPQTYH  
STYSHQGVNVSSGSAPRIQNYQSHQHQIRPYHTVAMSTKDYPGSQVHTVTTPKIDEAHSQNAAGDVVEVH  
AAPSVAQNHQOQPTFNQHPAQKHQSHQNHQYHAMTMSAPQASAPPELPPKDPTVSQDHKVTTPKIDEAQS  
QNNTSVDVEVPAAPSVAQNHQPQSTSNQPPSHQKHQSQQNHHHAMAMSAPOASAPGQTPKIDI PERPDHI  
AAAFERIKLQNAATYDENPNTEGQGLVDRSDEHSTVAPPVLLRPNQTPWQSWESFRGYPFKEVPLATT  
DIPSNVYNDASNVIASGRRKALLIGINYAESAPLQGCVNDAKNIKNLLIENGFTDDPTHMVMLTDEEQN  
SKYLPKANIRRGFQWLQVGVSEGDVLFHFSGHGSQVSDAEGMEEDGLNETILPMDYQKQITDDMIWSS  
VVYPLPSGVKLTVMDCCHSGTGLDL PFDYEPYTGWRVEETNPAHSGKHVVLFASCEDAETSADAIGKYQA  
GGAMTQSFILAYKENPMPKYPEFMAAIHGHILDRHFKQRPQLTSSQELDTKNSRFSLEIGIQRNKNRTIGR  
IQRKKIRPGSTGDRRNFLFR

>Espinifer1 CAMPEP\_0200425734  
PTATTLAPPLTDPYSWFDYDQDNSGTLQDEVVSGLLNAFYQKQSSSTADEQHGGTNQSGNDAAPPSVDTI  
RESIKAIWPAFDIDGDGQIDREEFCSPGGMAESLLAATTGGIPPGQAETTDGFFSSHHASGGGGYPGAR  
PHHSSGGGGYPAARPQQHQAYVPTAKPVASSGMMAGVYNPHAHQQQQQPAPTAPPPPRPAAATVQVVQP  
VYKTIQVQIPPGMGPGQKLKVLTDAGKEAAIVTIPDRAKWRANARTGQPFDIRVAEKPKPAPTVPVVQ

GHSVSGSPGRHSAGASVSSVTSSMAAMSTGAAAGPAAVTFKAWERFGGHSYHAPSLGMRRVPHLPITSMSNV  
HASGRRRALLIGINYKGTAAALRGCINDANNMERLLVQHGFPRDSCHMVKLVDSSRNRNYLPTRANITKAC  
QWLLQGVSKGDVLFHYSGHGAQVPDRSGMESDGYNETILPMDYRSGQITDDALWNSLIAPLPDGTRLTSV  
MDCCHSGTGLDLPYDVDIRTGRWKEDVNPAAHQGDAILFSGCEDAQTADTMDKFQAGGAMTQSFIKAYQD  
NPMATYPEFMAS IHRHLKRRGFHQRPQLTASQKFDVRSRIIFSFTDGIENHNPQIGRMKRRHVRPAKAGYK  
KNNMNDLLFSAGGAIALAGLANLFLDG

>Espinifer2 CAMPEP\_0200438730

XLFAAMKQERKSI SLVTA<sup>~</sup>AAVSLALNIALARATTLTDTSWRS<sup>~</sup>DLGVDSQTW<sup>~</sup>SLAMRASGRLALLDLHDLYV  
KEPSK<sup>~</sup>LQSVRLPPFRGGGAGEDGDG<sup>~</sup>SERNKDD<sup>~</sup>VDLYN<sup>~</sup>PRLSL<sup>~</sup>STAWSASSAQLPAPSQSATKAAIRECAES  
SQSVSPANDLQ<sup>~</sup>TTPGGASAGSCGQDMQ<sup>~</sup>QVCAGSRRTNTVST<sup>~</sup>TRASGQARALVVVWASWNILNGALLTLTP  
KDSYDFAAYLVEAIGAVRVSHGLQLFLAAGANI<sup>~</sup>SAQKVMGVGILVRLVFLAASFALGT<sup>~</sup>YETLQ<sup>~</sup>TQSKAPFL  
LSAGVMSMAAFSLLSNKGRPMLMANL<sup>~</sup>FSTTTCIKGMNMI<sup>~</sup>FRPFASNRLFGMGFTD<sup>~</sup>GELYWILHSSEKSSH  
SSLGQSDC<sup>~</sup>DFFXIPLLN<sup>~</sup>VI<sup>~</sup>GTKIPGKYRSLGFHLV<sup>~</sup>ISSVFMNALS<sup>~</sup>HGMPIRAAGLSAATWLALLAELTF  
VSGGYRRLSDVPRVYLFFLASALVCSIVFL<sup>~</sup>TDT<sup>~</sup>PRKHVDSSVGDALS<sup>~</sup>SVSGWRSDEEGASQEILWKQEDVY  
PLMYERDDNNTSDV<sup>~</sup>RSIRIIXL<sup>~</sup>AYSTSLTGTILLELSLRDGRK<sup>~</sup>PWCCECGKSGAALGRSAPMIDSTDSID  
STDSIDSHHDDGRQEDKTRHQ<sup>~</sup>QRSGALLLCAAAAAARSAAAAAARGESYMYMSCRELRRSRGKILF  
ASYFPQRRSGRGPKIRAFHLIYGFAKLPSLIVLRSRLIRVLP<sup>~</sup>CRVAEGGCCGHQTLTEVANKNNR<sup>~</sup>NAEAE  
TLEAAEKAI<sup>~</sup>PAEVRMISGCQDSQTSADVSNVASFSLPDPAGRAGGACTSALLK<sup>~</sup>VLYADHHRTEEDLSFQET  
LLKMREILSSGRYTQIPQLTSSRPMNIQESFDLVPDCSGERRALLIGINYIGQQGELSGCHNDVMNIKEY  
IIDVHGFPEENITILLDDGEHRDPTRENILDAYKALVSASKAGDACFCHYSGHGGKLRDDDDGDEADGYDET  
LVPLDYQ<sup>~</sup>RAGQIRDDDI<sup>~</sup>FNTLIGPMPKGVTLTCIMDCCHSGTVL<sup>~</sup>DL<sup>~</sup>PYVFKADGESEEMTADPDFDFGPLL  
QLAVSLFSDGIQKEDFLKIGSSLLSGVFS

>Espinifer3 CAMPEP\_0200433120

MTKKSNSSTDVDP<sup>~</sup>SAIIPATV<sup>~</sup>HMISGCE<sup>~</sup>DRQTSADVTN<sup>~</sup>VDAFSLPDPAGRAGGACTSALLK<sup>~</sup>VLYYI<sup>~</sup>SRSK  
T<sup>~</sup>PLSFVDVLMNMRGILSEESFSQIPQLTSSRLLNVSDAFYIVPPTCTGT<sup>~</sup>KRALLIGINYVGQSGELSGCHN  
DVLNIKEYLIDVLGFKEKNITVLMDDNESERPTGSNIIDAFKDLASLSKSGDAVYFHYSGHGGKLRDLNGD  
EKDGYDET<sup>~</sup>VIPVDYDTYGQIRDDTLYK<sup>~</sup>KLIGAMRSGVNLTCVMDCCHSGTVL<sup>~</sup>DL<sup>~</sup>PYK<sup>~</sup>FVANGSTTEMALDD  
DANLNLQEF<sup>~</sup>AADLELEGRWLLPCIGVLLLMALIAIVLWFLGRA

>Espinifer4 CAMPEP\_0200482898

MGDFLAEAEKAI<sup>~</sup>PAEVRMISGCMDSQTSADVSNVASFSLPDPAGKAGGALTSSLLK<sup>~</sup>VLYADHRKPDGDL<sup>~</sup>SF  
QEVLMKVRGVLGGSY<sup>~</sup>TQIPQLSSSRPMDINTPFEIVPDGCTGT<sup>~</sup>KRALLIGINYVGQQGQLSGCHNDVLMNV  
EYLKDVWGFPPQ<sup>~</sup>NITVLLDDGSHVN<sup>~</sup>PTRSNILNAYRTLVAESQPGDAVYCHYSGHGGKLRDDDDGDEKDYD  
ETLVPLDYQ<sup>~</sup>SAGQIRDDDLFNTLVGPMKKG<sup>~</sup>VQATCIMDCCHSGSILDL<sup>~</sup>PYVFKADGEQTEMAPSPDFDMGP  
LLALAGALASGASITEALSQQDPQQLMAMAQQCCTIL

>Espinifer5 CAMPEP\_0200484576

MAELDRFMNGLASPSPNHLANRSVAASAGNADSGAGDDDTKAATIVLGGANLVGTIPTSGPIDVDEVSQSS  
LVEEINAPSGAASSGILLARDGDKTTQEAEKDASVAAAVAPIVATLSMLSASKSRGGTEASMKKSKSQKK  
VTIVEQIDEKSLNDT<sup>~</sup>NENAVDSETIP<sup>~</sup>PRNSNMSVCSSHHTDDASTV<sup>~</sup>VSLQFKVEK<sup>~</sup>KKK<sup>~</sup>KRKTSQNPASISR  
EASSTASSTVMVDNTAGGKGRSNGGKTVFRSLK<sup>~</sup>KL<sup>~</sup>SNK<sup>~</sup>KVPSASSVSVSVVGGGPDA<sup>~</sup>IRILSGCSH  
SNASDIVPNTSSLPYPSGTTGGACASSLLQVLYDAEGGKAKAAGASKKKHGDGATSKLSYVDILVKMRSDLT  
TRGYDQIPQLAASH<sup>~</sup>PVDIAAPFRLKSGKGTARALLVGINYAE<sup>~</sup>EEENQSSSHNDVKNMHRYLTEVAGFDADN  
VTMLMDDGDCLPSKANI<sup>~</sup>IETW<sup>~</sup>KELAEDSKAGDSVFFHFSGK<sup>~</sup>GSETIAPVDYENAGQICDGD<sup>~</sup>MYNAFVKKI  
PKGVTVTCLMDSCHSGTVLEL<sup>~</sup>PYVFKADGTDIRSKTMMMNQGFN<sup>~</sup>SSK<sup>~</sup>FFF<sup>~</sup>GD<sup>~</sup>T<sup>~</sup>FNQLIGESRNGFSTPPRR  
SSNGR<sup>~</sup>KVASSPSTPTTNSACDDDLGDDAVTMVSI

>Fkerguelensis5 CAMPEP\_0188144146

MSSTLAQAE<sup>~</sup>EYIPANVRMISGCQDSQTSADVSNVATFQLPDPAGRAGGACTAAMLK<sup>~</sup>TLYNDEDNPAMDLSF  
QDTLLQMRDVLSEGKY<sup>~</sup>TQIPQLSSSRPLDIHTKFDLVPDSGFSGT<sup>~</sup>KRSVLIGINYVGQDGELAGCHNDVGN  
MTRYIQVHGFTE<sup>~</sup>THMTVLMDDGSHQ<sup>~</sup>APTYDNIMSAFRQLVQDTQEGDAV<sup>~</sup>FVHYSGHGGK<sup>~</sup>VADQDGDEADG  
YDETLVPVDFQAGQIRDDDI<sup>~</sup>FKVLIGMPRNV<sup>~</sup>TMT<sup>~</sup>CVMD<sup>~</sup>CCHSGTVL<sup>~</sup>DL<sup>~</sup>PYTFVADGTQEEMMETPGFDF  
GTLMKLYQSFQTFKQG

>Fkerguelensis8 CAMPEP\_0188102320

MGRFMKRLRQRLEDKIDTVTTSITDGTLSMPEGYPGIAPSQQHEAQRSFESNKPESMRKDVRMISGCEDSQ  
TSADVSNVRQFQLPDPAGGGGACTSTLLNILYKDEQIVEDTYSFTEILEQMRINLGKSGYTQIPQLTSLN  
PIDVTTDFQLIPEDASGTRRAVMIGINYVGHAGQQLSGCHNDVLMKKYIMDVHGFEEENIVVLMDDGIHS  
SPTASNMIQAYQQIVADSEGDGDAIFLHYSGHGTKLRDDNGDEDDGYDEALVPVDFNEGGGMIRDDDLFDIL  
IKPLAQNVHMVSLMDCCHSGTILDLPIYIFAPKLNTDGSYSMPQEMTLDETIIDLGLVEQFGGQAMGLLV  
NFLQKSLGQN

>Fkerguelensis9 CAMPEP\_0188100640

MGRFSINNLQTSVERIEKLLLEKFQKLLHSHKEDHENAQRDFEERKPDPTMKKSVVLIISGCEDRKTSTMS  
NIDMFTLPDSAGRCGGIVTAALLNVLYWNDDKQKLEVKQQIQTRTNEIEKSNQDTSERAASYRKVAEDTL  
PLLQLLVNDGGNLVDRMEEI IKPTEDEDDTEEDVQEMRKQMDYILSYDLFVNLDKAKKIYKAFNTSSPLF  
VSGNIAGCAQIYREAAEKNILPLLPSNDDLQNKLEVIASKYDDPAEETRAFREQFDHILSYNEWTDSDKK  
FEEALDNAKQCIVEAIDNGATYLDDEDYDSIASIHRKSAEEKILPLLNSDLQSRLESVIATEYSDTCVE  
AAAFLEPFNYILDWTENKEKLLKCMKNNCSKEEAQHLYVDVIDKLRSSIKNSGHDQKQPQLTSLTLIDIN  
TEFKLVDPDNFKGRRRAVMVIGISYDGGLIGCHNDVINMKKYLIERCDFKEYYVDVLMDDGVHTLPTKSNIMN  
ALLRVVNDNCNDGDAVFFFGHGTEIVDENGDEKDGDECLVPCDYLEYENFKDGVISDDDLFDNIISELP  
SDVHMVALMDCCHSGTILDLPIYILKANEDGSMPEMVLDDTIDLKSLIKQYGGRRKLDLLLNSVSKLFIEK  
EMPPMHVNPVKLGRVLLLADEDAYRHSFARFEGDELNGLIDEKLPARGKECKVVTVWGDQTITAFDDGTR  
FDFPFESVEAQLHVMEMPEAESNEGEHTPTVIFKLHSSLNSVIDIYEVDRDGTVMVGSISKEDEDSGTLHMDT  
HYGHSFRFCTHEESTTSSQQMDMAKSLISTAISIGAPAYNTGDIPECARIYKETALQIAPMLPQNLTGLE  
ATIQQTFKNANEEAWAFRKNFDSIMSFVPSSSFKIYYIDQCNGPHQTCVVTSDDDDEESNNDEEDSDDDGEE  
GGEDEEKSDDDDEESDDDEEDGDDNGEEGGEDEKESVDDDEVSDDDGEEEDGEEDGEDDEESENDDKE  
SL

>Fkerguelensis10 CAMPEP\_0188069114

MNTTNNRFLSYDECQQFERNKPGELRDADIWMIISGCDDHQTSADVSNVASFQLPESNGKAGAGGACTATLL  
QVLYEEEEETPHDDYTFTQVLEKMRQRLRSKGFQTIQPLSSTKPIDMSTEFKIVPDDLPGTSRAVLIGINIR  
GQKQKELGCHNDVFNLYNIQDWYGFQDENVTVLADDGDHQLPTKQNILAAYHRIVRQSRSGDSIFLHYSG  
HGTVKVPDLNGDEDDGYDEALVPLDFDRSGVILDEDELYEIVFKGLPSNVHVVALMDCCHSGTVLDPYIFKA  
DGNFASKMEIDRGSLSASKLFGQLGGMALKIVMGGSNNGGSGQLVEGFIKHFLR

>Fkerguelensis15 CAMPEP\_0188088198

XTLQSIICIMFQQGRERRQNRGDRRTDRQERRGNNRSRPARPATTTTTTTRATTTTTSTKGRSTAARETT  
TTATVNDEGLSFDEQAEQAI PADVRMISGCHDVQTSADVSNVSDFALPDPAGRAGGACTSALLQVIYNEHH  
LDPTYHQLSFMDVFLQTRDVIDGMGYQPVPQLSSSRRIDIHQPFNMMKNDSDTGPGSGTRYAVLIGINITS  
HKQGGQLSGCHNDVGNIKKYIMDVGKIKAHNITTLMDDAGISIPPTKRNIMKAFDELTRKCPGDCAFVHYS  
GHGSRQKDYTGQEEESGYNSTLVPIDFNEAGQIVDDELYEHLVLMKMPRGSTLTCLMDCCHSGTVLDPFNFV  
ADGEQTEMVEMENFPFLQLLQCVGKALQEAGVSQLRDLRDKDKREQVKAALVENGVGEQLAAARAGAAANA  
GGAGAGSGQRGGVAGGTVRDNIKSRQERRENRRKFLR

>Fkerguelensis17 CAMNT\_0031427971

TMDEEKIRNAIPANFVMLSGSEDKQTSADVNGVGFSLPDPAGKAGGACTSALLKVVNENQGRQMSWIDLL  
HRMRNVLKDKGFDQIPQLSSSRMIDVNNQFEIVPRQSINEQGARRALLIGINIVGQGGELSGCHNDVKNIK  
KYLIRKEGFQEKDMLILMDDGRQHAPTRQNIEMAFDRITQYSKAGDVVFIHYSGHGGKIRDTSGDEADGYD  
ETLIPLDFKQAGQIVDDEIYSRFVTKMPGNVTVVVVMDCCHSGTVLDPYEINATQSKMSLNLKGFNMGLLN  
NATVAIGCCLCILSMLDI

>Npunctata1 CAMPEP\_0199328580

MGFLNEQQRRAFEEEEKQALRADIWMVSGCEDRQTSADVSNVATFQLPEPSGNAGGACSATLLNVLYEDEK  
NPLDRFTFTQVMEKMRGILKRKGFQTIQPLSSTRPIDMNDKFLVPDDLPGNRRRAVLIGINIRGQKQKELRG  
CHNDVFNMYNYIQDYGFQDEEDITVLVDDADHPPTKANI IAAYQSVVAKSQPGDAIFLHYSGHGTKLPDD  
NGDEDDGYDEALVPLDFKSAGMIRDDYLYDIIVKALPSGVHVAVMDCCHSGTVLDPYVFKANGEYRME  
IEDKDFDNKIFRIFGGGKMGAMMTKVMGKMAKGMKQFLR

>Npunctata2 CAMPEP\_0199330992

MESRINDAIPAKFVMIISGSEDKQTSADVNVVGSFQLPDPAGKAGGACTSTLLKVLHDNGNRPMWIDLLHK  
MRDVLRLQKGYDQIPQLSSSRMIDVSHKFEIVPTETIERNGARRAILIGINIVGQKQKQLSGCHNDANNIKNY

LINNQGFLKEDMLIILMDDGRHHQPTRANIMNAFDRIVQYSKAGDVVFIHYSGHGGRVVDTSGDEADGYDET  
LIPVDFQRAGQIVDDDLKHLVKRMPAGVHVTVLMDCCSHGTALDLPYEIDATQSKMSFNKGFNMGLLDDP  
GAMCCLAICAACLFDDIIGGIMSGLAD

>Npunctata3 CAMPEP\_0199330036  
MEDAIEQAKKTIPAEIHMISGCRDEQTSADVSNVNSFQLPDPAGRAGGALTSALLNVTYKDEEDTGKDLFS  
QETLLRVRDQLKKGFSQIPQLSSSRPMDISKKFDIVPDNMHGTRRAVMIGINYVGDNPGEIRGCHHDVFN  
MKKYIMDVHGFQEENITVLMDDGEHIPPTRENILGAYRKIVAESESGDVVFCCHYSGHGGKLRDDNGDEEDG  
FDETLVPRDYQTAGQIRDDALYDTLVAPMKAGVFATFVMDCCSHGTVDLDPFNFDVADGEQEEMKLEQGFDF  
SPLLAFAAAYMASQQAGDDPVSGLLSACGACLIQ

>Npunctata4 CAMPEP\_0199338742  
LPSPAGRSGGACTCALLSILYDAEQNKKPIITFQKVLLELRRRLSESGMTQIPQLTGSRPLDLHETPFVFN  
PRENSINTRRALLVGINYFGQNGQLSGCINDVNNVKKYLCQYEGYLEKNILVLTDDGRNPHNPTREKIIRA  
LRQLVAQSVSGDSVYFHYSGHGGLLDPDYWNRFKAGKHLKEYDETLYPVDHERAGQIRDFSLFNHFVKPMS  
AGVTVTVMDCCHSGSVLDLPYSYRPT SAGTIRMQRSMDTLTNLAFILYILAGGMLPHHGGLFDSVTQNLQD  
VTGVSVDLGLTGVVEEMTFDVEGLGDYGDHMIQDNGGSPDITVDALDNQYQGDRAFDFEQGDVPDVGIG  
HTFSRNFVIGESGFVSDTGGDGSDLNGTDDVDCGENDIDCADCGDIGDILGNILEDL

>Npunctata6 CAMPEP\_0199343924  
MGRFLRKLRRERRRRRIGNQEEAQRAFEEEEKPDAMRKDVIRMI SGCEDKQTSADVSNVHSFQLPDPAGRAGG  
ACTSTLLRILYKDETIIPEDTLSFTQVLEKMRDLAEQGYTQIPQLTANNPIDVEADFDLVPSTATGTRRAV  
MIGINYIGDDPGEIRGCHNDVFNMKKYIMEVHGFEEEDNIVVLMDDGEHDPPTRDNIIAAYEKVVADSEAGD  
AIFLHYSGHGKLRDDDDGDEDDGYDEALVPRDYNEAGMIRDDDLIDILIKPLADGVMVSLMDCCHSGTVL  
DLPYIFKADGGATPNVMQLDDTIDLGLIQQFGGHAIGFLKNFLEQQG

>Palata1 CAMPEP\_0200176934  
LERDELISGVIRAAPKNDAAANIADAVYALWSSWDVDGDGRISVDEFRCRKGGLGEEIVRNLNLEVNDKGDTR  
VNFYGPFAVNPFAHNLQPYTNTASTAASQQAVPSQPATWNCLACTFIXFIESNILQPCVFFLLKDVNKHNO  
CFPLILSLLCLGHSHVNSILGVCTTDVPTAVPSQPATWNCLACTFINLSSQTSCKACGTPQVTTPTIHA  
FSPSAISQPYPHGSSQVPSSPHAGHKTFRVKVPPGMKPGQKVKVSTGPTTSDAVVVIIPRHAWSNNDHNSN  
GRWEPSTFEVTVTMGDNQENIYQSPNATNHTYTHHSPNHTANHTNHTYTNHSTNHTSHIPNRINNSYHHIP  
ERFHDGRYSGDVPWMPFHQFQSQKYKPPPTKMI STPLTSNHSPINASGRRKALLIGINYTNTRASLRGCV  
NDAMKIKGLLVENGFTDDAAHMTLLIDETPEPHAGGGGAVSSYLPTKANIVKGLQWLVSGRKGDVLFHFH  
SGHGAQVPDATGQEADGLNETILPLDYQKAGMISDDTIWGSVMYPLAEGVRLTALMDCCHSGTGLDLPFEC  
QLKRNLSVNNNTDYQWVEDINPAHSRGDVVLLSGCEDAQT SADAFDRHRKEAGGAMTTAFIDAYRAHPAGS  
TYPEILNSISEQLRRKNFAQRPLTTSQRFDVRRRIFSLVEGIEPNGNAQIGRLKRRHFKPAKNVTAIDPR  
LNELLFGGALAIGLASILFD

>Palata2 CAMPEP\_0200175712  
MTEITPYDYDVVTPGTADERDYIGETYQQSDVISYWHGLGRGGNTDDVSSLNSEGIQEYINGALIIISILL  
LIFIVIWGGIIIFLRIYDDCIPGKIKFLSGWRFENTSSTSLMPFIIRITFIFCAICVYIFTMIYVQKGIHG  
FEDATKIAQAQNTFRFRDVEEADRVTITMLANGEEASGLKDRIKRDI PYLCPKRNISNLGTDLFLTLNKYT  
NSLDQLGDFYIDQRWKPAEMWVERLLNITVKFDDTIDEINLPLFAIHWIPLIVLTTILLIATLLSIYDNGR  
EDLKIRLAPWFQWCLKKIVFPLFTLWSIGTFFLAAAVAFGLVVNSDL CAGGPGAGSPDFPFMRLVDSSGLE  
GTRTGGAVYKFIKYSRGC DKRFRDKGSTFYEGNLTRALSQTEYITDFILDKGTIEMSDDCGNDVTGLMVA  
LDELTRHMQLKVGTKRIRDVLRCKRLNNIYTELFYNGLCYHSVNALAWSYCSLLAIGFFSMLMVTLRSSI  
LPSYEYSWSEEFDIDGDNVSDDQTMEEEDSYELESNTMAFPAIVRMI SGCQDSQTSADVSNVASFSLPDPAG  
RAGGACTSALLKVLVSLIDSSCEISWEDLLIKMRENLNDDGYKQIPQLTSSRPTDLKSNFELVPSDGSATG  
AKRALLIAINYVGQKGEELTGCINDALNMKKYIMDVWGFEEENITMIMDDGEHMEPTRENILNAYNDLVIQS  
EAGDSIFCHYSGHGGKLRDDNGDEEDGYDETLPVDYARSGQIRDDDLYEILVGCMPRGVYMTCLMDCCHS  
GTVLDLPYKVFVAPERRR

>Palata3 CAMPEP\_0200178272  
MSPSTLCCRKNFAVADTENAIRSTVRMISGCMDSQTSADVSNVSQFQLPDPAGRAGGACTSAFLRVMYNE  
QQRPSYDLTFAEVLGMGRDVLNNGSYSQIPQLTSSHALDINEPFQLHSLTSFRGKHKALLIGINYVQSGE  
LSGCHNDVWNIRSYLIDVHGFEEERYITILMDDGSHTSPTRENIMSAFRMLVKSSVGGDSAFCHYSGHGGKI

RDNNNDES DGYDETLVPLDHYASGQIRDDDVYDALVGPMPNSVTLTCLMDCCHSGTVL DLPYKFKPDNTAT  
DKMVLDPNFDNAKLVRFARKLFLGLATETG IKRNDTFVDKEGQLWRKAEDGEPLPFKLYKHQLIQRDIEEHN  
NENI IKKIEDMG IKVYIVSHNSSDLLQCIDDDVAEEVSNFSIKTNGRKRCCFLILTEEGRLYNLALGGNVGK  
TINGLAGQWEALLNSFSGLEATIAIAVLARSFGCAEVGKGYELRPGYLSLILGYILSEEMGLSWQNVAMFV  
RGIPRISQLNPWIYPE

>Palata4 CAMPEP\_0200144054

MGLFSRLREKLESLDDEKVVIKADV RMI SGCMDAQT SADVSNVDDFQLPDPAGKPGGACTSALLKVLYDEE  
KTPTDDLTFSEVLEQMRTVLDEEYEQIPQLSSSHALDVSTPFTVVGEGTKRALLIGINYGQNGELSGCH  
NDALRIKKYLM DVYGYEEENFTYLM DNGVYDDPTYDNILAAFDDIVAKSEAGDSV FVHYSGHGGFLADDSC  
DEEDGKDETLIPVNYTEAGQIRDDTVFNRLVLPMAADDVTLTCLMDCCHSGTIL DLPYKFKAGMGESVMSLQ  
PGFRFDNFFRKIGLSDEE

>Palata5 CAMPEP\_0200147548

MSAFGEQAQKVIPSEFRMISGCHDAQT SADVSNVGAFLPNPCGKAGGACTAALLKVLYEMNERRETWSWV  
DVL RKMRTNLDGMGYEQVPQLTSSRMISVTD SMEIVPATQQGVRRAVLIGINYGQSGELSGCHNDVFNVK  
DYLNVNLGFENRHITLLDDGLNTSPTRENITYAYRDLVNR SAPGDVAFCHYSGHGGFVDDTSGDEEDGRD  
ETLIPVDFQSAGQITDDELLKDLVHPMKAGVLTCLMDCCHSGTVMDL PYRFTADGDNIQMREN PSSNMLE  
YGDLIATFAGAYALTGLLGAGGGMGGMGGSPNNTGEEEEAD CCTCIMDLVNSFL

>Palata6 CAMPEP\_0200160162

MSSTLEQAKEYIPANVRMISGCKDSQTSADVSNVASFSLPDPAGRAGGACTAAMLKTYLNDEEDRGVDLSF  
QDTLLQMRKVL DQGSYTQIPQLSSSRKLDIHTKFDLVPDDGFEGTKRAVMIGINYGQSGELAGCHNDVGN  
MKRYIQKVHGFTDEHMTVLMDDGQHEEPTYGNIMAAFRQLVENTKEGDAV FVHYSGHGGKLRDDDGDEADG  
YDETLVPLDYQEAGQIRDDDFSTLIGPMPRNVMTVMDCCHSGTVL DLPYSFVADGSQDEMTETPGDFD  
GTLIKLQSFQNGGGGGISPEVMQGIQKIASKCFMSF

>Paustralis1 CAMPEP\_0199647600

MPLRLNRKDRSGRENAAAVSQONNPSHSKNAATSKNNFDEQVEYLIP AQVRMISGCHSLET SADVSNIIHSI  
AGKGLPSPEGRAGGACTTALLSILYDAQKRKNDNHYSGDGSTTFQQLLELRRRLAQTGMSQVSQLTSSR  
PLELEETPFSLRSIPATNQQQQQQQHG GGGTQRALLVGINYYGQRGQLSGCINDVNLVKKYLCNYQGFLE  
KHVLLIIDDGRNHHPTRDNIIRALQRLVKQSKPGDSVYFHYSGHGGLDPNYWNR YKAGVSNKKYDETLYP  
VDHLKAGQIRDFNLFNFVKPMAAGVTVTCVMDCCHSGSVLDL PYSYRPTSDGTIRMRQSMDSL TNLAFLY  
ILAGGMLPDLGFESIAQNL ENATGETMDNLQIGIVEELSSDIGGYTNDYTNDGDVVTGATCDNTDLTGIAG  
DDRDICSSNGDFAYEGDEITGEDITYDIDSGGFVDVGGTNLGG AQDGF LADDYNPDGCEGNECDGCDVIG  
EILNTLFEDS

>Paustralis2 CAMPEP\_0199652308

MDAKIESAIPANFVMISGCEKQTSADVGNVSTFALPDPQKAGGACTSLLKVLNENQGGSMSWIDLLHR  
MRSVLKSKGFDQVPQLCSSRMIDVNNQFEIVPEEAQGCRRAVLIGINYE GQQGELSGCHNDVKNINKFLRK  
EQGFHQSDMMILMDDGSSTPPTRRNIMDAFDQVVQNSTAGDVVFIHYSGHGGNVPDESGDEEDGYDETLIP  
VDFQSAGQIIDDELYERLVTKMPAGVTVVVLMDCCHSGTALDLPYQINATQSQMSLSEGFNFSLLDNAAGV  
IGCCLCLMSILDMVM

>Paustralis3 CAMNT\_0045498567

FQKLIPTYMGRFFKFTQHVQNQVKAAMGDQSDAQAAFEDQKPD SMRNKDVRMISGCEDAQT SADVSNVAN  
FCLPDPAGRAGGACTSTLLNILYKDDQVPEDTLSFTQVLEQMRSDLGSGGYSQIPQLTSLNKIDVETDFEL  
VPSTATGVRRAVMIGINYGVHSPGELRGCHNDVNLMMKKYIMDVHGFEEENIVILMDDGIHESPTKENMVA  
YKQIVADSEEGDAIFLHYSGHGTKLVDKSGDEDDGYDEALVPLDFQEVGMIMDDDLFDIL IAPLQDGVH MV  
SLMDCCHSGTILDLPYIFKPNQDGSMP LGMMLDESIDL DGLLQFQGGQAVGILLNFMQKACC

>Pfradulenta1 CAMPEP\_0199827318

MGRFFKFRQNI REKIEEAIGDAIGADGGGFIGNQEEA QNEFEDKKPDSMRGKDIRMISGCEDSQT SADVF  
NVVDFQLPDPAGRAGGACTSALLRILYKDEHIPEDTLSFTQVLELMREDLSEEGYRQIPQLTSLNKIDVET  
DFELVPHTATGVRRAVMIGINYGQD GELRGCHNDVNLMMKYLMDVHGFEEENIVILMDDGVHDEPTREN  
IEAYQQIVDESEDGDAVFLHYSGHGTKLVDGSGDEEDGYDEALVPLDYDEAGMLLDDDLFEILIEPLAEGV  
HMVSLMDCCHSGTILDLPYIFKPNDDGSM PHAMKLD DDTINLDGLVEQFQGGQALGLLVNFVAESF

>Pfradulenta2 CAMPEP\_0199811974  
MDAKMRNAIPARFVMI SGSEDKQTSADVGNVGTFSLPDPAGKAGGACTSTLLKVLNENGGQPMSWIDLLQK  
MRSVLKYKGFQDQIPQLSSSRVIDVNNQFEIVPESSGGRRAVLI GINYEQQGELSGCHNDVNLKKNYLVR  
EEGFQEQDMI ILMDDGQHNL PTRKNILDAFDRIVQYSKAGDVVFIHYSGHGGRVYDSSGDEADGYDETLIP  
LDYQSAGQIVDDDLRQLVTRMPEGVTVVVLMDCCHSGTALDLPYEINATESEMRTNPGFNMALLDAGAVV  
SCCLCLNVLFELLASLDGGDGGDRGRDRYDSGE

>Pfradulenta3 CAMPEP\_0199786516  
MPSLFNRKNRHGGGLGSDNFDATTTGTDNDFDQVRQLIPAEVIMISGCHSLETSADVSNVKTIDGHLPSF  
EGRAGGACTTALLSILYESLKTTRNNSPREISFQQLLLRLRGRLAQSGMSQIPQLTSSRPLELEERPFSL  
KSNPNNGGTRRALLVGINYYGQSGQLSGCINDVLNVKYLKCNHHGFLEKHVLLLI DDGRNHKPTRENIIRA  
LRLVVEHSKAGDSVYFHYSGHGGLDPDYWNRYKAGKKDKQYDETLYPVDHARTGQIRDFSLFNHFVKPMT  
AGVTVTCVMDCCSHSGSVLDLPYSYRPTEDGTIRMQRMSDSLTLNLSFLYILAGGMLPDFGFESIAENLQSAT  
GEAMDALQGTGVEEFSSDLGGINGYGLGNGDDVDDAMNYTSGLETGNVDTGFDDSNVDYGGNGVDDFDLQ  
NTDIAENAYGDGRGDAFFGAFRDITYFADETVDGADCGDVNCGDADCNDGCDVVGAILGALMDSDS

>Pfradulenta4 CAMNT\_0045629199  
RQQQQQKQQQQQVLRRTDQONT SRLSGKRLSCGTLANKKATKATTRTTQHSHTRHEIQATIGANKQ  
TNMFGKLGKQYAAQVAEKVEAFALEKLNERNPQSTVTEETTEKLKLSISGNRKALFIGINYGQRGELKGCV  
NDVNIKKFFRTHYTLNDTLVLTDDKRAEPETDHAPTRKNILNAFKWLKVGAKPGDLLLLHYSGHGGKSKN  
HDGTEASGFQDTLIPVDYKAGQILDDDVHDLCKSLPKGVRLTAIFDCCHSESIMDLPFVYVNGNLEIV  
ENDRNQS IATIMATGTRFLLDGNRKKAGQALKNEITSMLSVMAGGQDPAQEARKKVIASNQTKADIIMF  
SGCKDMQTSADTSQQGEAGGAMS FALIKTLEKHHRDKDLTYTELLREMRQVLEGGYTPVQLSA  
GRRLLVDHPPFRV

>Sdohrnii1 CAMPEP\_0192149910  
XISGCHDAQTSADANITSFQLPNPAGRAGGACTAALLQVLYDRPSIAAGNDNTSWVQVLRMRRENLEQGF  
EQVPQLSSSRIIDVNERMTIVNDNPSGVKRAVLI GINIVGQQGELSGCHNDVKNISSYLQVQGFQNM  
TLMDDGVHDNPTYDRILQAFQVWVNESQAGDTVWIHYSGHGGRVEDDNGDEDDGYDETLIPVDFQRKQIR  
DDDLLRRLVVKPMREGVLMTCMLDCCHSGTVLDPYRFIADGDHYQMERNDDFDMDHLEIVAKIAATVAASL  
GGMAQSVIQSSGLVEEIDECCVIL

>Sdohrnii2 CAMPEP\_0192135274  
MGFFNKLKEAALKEAKKIMEELGLGGDDDETKPTMTTEEFKTKPDEL RKDIRMISGCQDRQTSADVSNV  
SSFQLPDPAGKAGGACTSTLLNILYADEHVPEDDLSFVEVLEEMRIKLSGGYSQIPQLSSMNPIDVNTKF  
DLVPDTATGTRRAVMIGINYGDDPGELSGCWNVDVLMKKYIIDVHGFEENIVILMDDGIHTEPTKANI  
DAYKTI IAQAEENDAI FLHYSGHGTCLRDDGDGSDGYDEALVPRDFQTSGMIRDDDL YELLFKNLPDGVH  
MTSLFDCCHSGTILDLPYLFKGDGSQTEMTLDPNMNLDAFIEKLTGKLMEFLQAKMAASLSL

>Sdohrnii3 CAMPEP\_0192159136  
RGKPPPPRRQSSSTAGQSKKADATIKRSSSTREARPVKSNANSKSSRRDSQSRKSRPRDDSRNSKPRD  
KRSRSKSRPRSSPRNNENDTQQRSSKSSSSRSKPPQSKGNRSKSSPRSGTLHGKRSSSSSNKGNKAQA  
ESFNAKKRQKQFASQAKKAIPTNVRMISGSHDAQTSADVGNINAQFELPNPAGRAGGACTAALLQVLYDAH  
DRGDINMSWVDALREMREILHEKGFQDIPQLSSSRMIDVCDPFFVITPESFDPGFNKRRAVLI GINYGQKQ  
QLSGCHNDVHNVTQYLKEVQGFKDENITILMDDGMHKPPTKSAIISAFKRLVKQTKEGDVVFCCHYSGHGGR  
LPDDNGDEDDGYDETLIPLDFQKSGHIRDDDLKILIHMPAKVTMTCLMDSCHSGTVLDPYRFVGDGDH  
VEMEMNDRVNFTEALWTGLSVAAGVVAGNAIADAVNVAPEMMILGGPNAIHEHX

>Smarinoi1 CAMPEP\_0192232734  
MGFFNKLKEAALKEAKKIMEELGLGGDDDETKPTMTTEEFERTKPDEL RKDIRMISGCQDRQTSADVSNV  
ASFQLPDPAGEAGGACTSTLLNILYADEQVPEDDLSFVEVLEEMRIKLSGGYSQIPQLSSMNPIDVNSKF  
DLVPDTATGTRRAVMIGINYGDDPGELSGCWNVDVLMKKYIQDVHGFEENIVILMDDGIHTEPTKANI  
DAYKTI IAQAEENDAI FLHYSGHGTCLSDDDGDGSDGYDEALVPRDFQTNMIRDDDL YELLLKNLPDGVH  
MTSLMDCCHSGTILDLPYLFKGDGSQTEMTLDPNMNLDAFIEKLTGKLMEFLQAKMAASLSL

>Smarinoi2 CAMPEP\_0192224422



XQIPSEVRMISGCHDAQTSADANITSFQLPNPAGRAGGACTAALLQVLYDRPSIAAGNDNTSWVEVLRRMR  
ENLDEQGFQVLPQLSSSRIIDVNERMTIVNDNPSGVKRAVLVGINYVGGQGELSGCHNDVKNISSYLQVQV  
GFRPQNMITLMDGVDNPTYDRILQAFQWVVNESQAGDTVWIHYSGHGGRVEDDNGDEDDGYDETLIPVD  
FQRKGQIRDDDLLRYLVKPMREAVLMTCLMDCCHSGTVLDDLPRFIADGDHYQMERNDFFDMDHLIEVAKI  
AATVAASLGGMAQSVIQSSGLVEEIDECCVIL

>Smarinoi3 CAMNT\_0036352755  
PRSSPRNNENDTQQGRSKSKSSSSRIKPPQSKGTRSKSSPRSGTPHGKSSSSSSSNKGNKAQAESFNAKKR  
QQKFASQAKKAIPTNIRMISGSHDMQTSADVGNINAQFELPNPAGRAGGACTAALLQVLYDAHDRGDVNMS  
WVDALREMREILHEKGFQDQIPQLSSSRMIDVCDPFVITPESFDPGFNKQRAVLIGINYKGGKQGLSGCHND  
VHNVTQYLKEVQGFKDENITILMDGDMHKPPTKSAIIISAFKRLVKQTKEGDVVFCQYSGHGGRLPDDNGDE  
DDGYDETLIPLDFQKSGHIRDDDLLKILIHMPMPAKVTMTCLMDSCHSGTVLDDLPRFVGDGDHVEMEMNDR  
VNFTEALWTGLSVAAGVVAGNAIADAVNVAPEMMILGGGPNAIHEHSDTACCAVS

>Smenzeli1 CAMPEP\_0192261006  
XRCRLNIYQGEKDDSPATASSYTCIPLQCRRRGDHQAEESIRRLHHPGSLKTQVKAGLIQHSRDPHQREE  
RQDQPSLMLTTKPEDEIEVGANPDQEMIIIVTQNRGTSLDPGANRDPDPLEKIMNTIHKRDGGANQNLLR  
PGANTXAKSNRSKSNPRSSAPQAKSSSSSKGNKAQAESFNAKKRQQKFASQAKKAIIPANVRMISGSNDVQT  
SADVGNINSQFELPNPAGRAGGACTAAILQVLYDANDRGDVMDSWVDALREMREILHEKGFQDQIPQLTSSS  
MINVSDPFDITPQSFDPNLKQRALLIGINYKGGTQGLSGCHNDVHNVSQYLOEVQGFKEDNITMLMDGDM  
HKPPTKSAIIISAFKRLVKQTKEGDVVFFHYSGHGGRLPDDNGDEDDGFDETLIPLDFKKSQIRDDDLLKI  
LVHPMPANVSMTCLMDCCHSGTVLDDLPRFVGDGDHVEMEINDRVNFTEALWTGLSVAAGVVAGNATADVA  
PEMMILGGGPNAIHEYS

>Smenzeli2 CAMPEP\_0192280530  
MGFFNKLKEAAVKEAKKIMEELGLGDEKDDDTKPTMTTEEFENTKPELTKDIRMISGCQDCQTSADVSN  
VSSFQLPDPAGRAGGACTSTLLNIIYADEHVPDDLLSFTFVLEQMRVKLRRGGYSQIPQLSSMNPIDVSTK  
FDLVPDTATGTKRAVMIGINYVGDSPGELSGCWNVDVLMKKYIQDVHGFEEENIVILMDGDNHTEPTKANI  
IDAYKTIIGQAEENDAIIFLHYSGHGTCLRNDNGDEGDGYDEALVPRDFQTSGMILDDDLIYDLIKDLDPGV  
HMTCLMDCCHSGTMDLPLFKGDSQTEMILDPNMNLDAFIEKLTGKLMLEYLQAKMAASLSL

>Smenzeli3 CAMNT\_0036412763  
ADCSDIVAEPIKQYSVLSRNKMPSFAEKVASQIPSEVRMISGCHDAQTSADANITTFQLPNPAGRAGGAC  
TAALLQVLYDRPSIASANDNTSWVEVLRRMRGNLEQQGFQVLPQLSSSRIIDVNEPMTIVNDNPSGVKRAV  
LIGINYVGGQGELAGCHNDVKNISKYLQVQVGFQVQNIITLMDGIDHNPTYDKIMQAFQWVVNESQAGDT  
VWILYSGHGGRVDDNGDEDDGYDETLIPIDFQRKGQIRDDDLLRYLVKPMRQGVLMTCMLDCCHSGTVLD  
LPRFIADGDHYKMERNDFFDMDHLIAVAQMAAAVASSFDVGSVGRMAQSVIQSTGLVEEIDECCVIL

>Skcos11238  
QTQYQTANNGSSYATQQQQHHTSYVTQPMPTSAVXPTTSTQPLQPPVATAYASGGGGTSAPPVVATAYV  
PSSTNATTASSATAAPILATAYIPANELDDGHTRPSAPPMPNSYNPNYSATTGNNNFHTHQDEFWECSVCT  
FPNRQSETHCKGCGNAQPGGNSSSYNSKPQAPSAVQSSAAPSYSYTMNDINSHMASISLGTGTYPNGINMMS  
SSAPPPSSTSGTMKVHIPAGMRSGQKLVKVRSPAGDEVVKTIPNQSEWSYEIDGRPYFRLQFGPSQTAAAST  
ASPAMSAASTMKVHIPNGMGXPQXIKVRSPTGSEVVKTIPNQSEWSYEIDGRXFFRMAFGDEXNATNYSYS  
TTLSTPPPHSTTWREFHTRASSRYNPPPIGMKPVQHVPRGVSSITPNGRHKSLLIGINYTGTRAAALRGC  
NDAKNMQTLLKNGFPNDGSHMLMLTDERHRGSEYQPNASNIMKAMSWMKDAQKGDVLFHFGHGGQV  
DKTGHEADGFNETLIPLDHTRAGQISDDVWLGSLVYNLPEGARLTALMDMCHSGTGLDLPYDYNVNTTRWT  
EDVNPASRSGDVVLFSGCEDSQTSADVQYSGXGGAMTLAFTKAYQCCSSSTYHEFLSVVXKXELRKKRHSQ  
RPQLTSSQQFDASSRIIFSLGHDNGGITSMIEPNHNPQVGRQKRRHVRPARQGFGRAGGGNDLFLGLGIAAVG  
AALFADALF

>Skcos12022  
GVEVLRRMRENLDEQGFQXPQLSSSRIIDVNERMTIVNDNPSGVKRAVLXGINYVGGQGELSGCHIDVKN  
ISSYLQVQVGFQV\*NMITLMDGVDNPTYDRILQAFQWVVNESXAGDTVWIHYSGHGGRVEDDNGDEDDG  
YDETLIPVDFQRKGQIRDDDLLRYLVKPMREGLLMTCLMDCCHSGTVLDDLPRFIADGDHYQMERNDFFDM  
DHLIEVAKIAATVTASLGGMAQSVIQSSGLVEEIDECCVIL

>Skcos13618  
GELWRRNFAINATVHKSSKFTVMSAKNNDLEEEYEVEKVVVDHRYRKTAFPDGSHDEYLKWKGYPSSENTWE  
PESNLNPSALAEARTLKWTTTEQFENTKSDELKDXLCISACNDXATAADVHNKXFKLPDAAGKFGGGGG  
GACSSLLSILYADEKVLLEEDLSFKEI IWKMRKTLIKDPYRQIPQMSMNPXDVNTKFDLFPDTATGTKRA  
VMIGVNYVGDENELSGSHNDVLMKRYI IQEVRGFEEENIVILMDDGKHTNPTKKNIIHACKKVIRQAEE  
NDAILFLYSGHGTRVEDDNGDERDGFDEAIVPRDFEENGFI LDDDLYEILIKDL PKGVSMFSLFDCCHSAT  
IMDLPYLFKGDDEMOTEMTLDPKFNLDAFIEKITGNLKEFVQAKMAAKQKKAAGSKRKKVPEPSKEKKKKL  
EQEHE

>Skcos16234  
SRGKPPPPPPRRQSSSAAGQSRKAELTIKSSSSTRGEARSVKSHANSKSRRDNQSRKSRPRDDSRNSKP  
RDKSRSRKSRPRSSPRNNENDTQRRSKSKSSSRKPPQSKGTRSKSSPRSGTPHGKSSSSSSSNKGNK  
AQAESFNAAKRQKQFASQAKKAIPTNIRMISGSHDMQTSADVGNINAQFELPNPAGRAGGACTAALLQVLY  
DAHDRGDVNMSWVDALREMREILHEKGFQDQIPQLSSSRMIDVCDPFVITPESFDPGFNKQRAVLIGINYKG  
QKXLSGCHNDVHNVTXYLKEVQGFKDENITILMDDGMHKPPTKXAIISAFKRLVKQTKEGDVVFCQYSGH  
GGRXPDDNGDEDXGYDETLIPLDFQKSGHIRDDLLKILIHMPAKVTMTCLMDSCHSGTVLDPYRFVGD  
GDHVEMEMNDRVNFTEALWTGLSVAAGVVAGNAIADAVNVAPEMMILGGG

>Skcos4616  
LAKMGNQESVPSVPGDEEIPMDASPQVGKHSKSLHSPQYMEGVPEPNKSSNRSKSKDKRSSRERPERGE  
AREDENRDSVEQHNNKRI SPASTDPSMSYANNFATLPPRGNKRITDDQVHLDLPMAELMAYLQMVANHS  
SNLPLTRRDDPDLGRTVSSLTAD EYAFKCAAFIPSKIRILGGQFGKYGKVWDLPTSEEFNAKSSSTREPGIS  
YGGACSNALLKAIYDTESEINNVASPHMVDAANLFEDDDQTVNTAGFSIDQNSKSFDKLSFDDSNATSLT  
WAQLLHKMKGEMHGMGFNVPAITSSYKFDLNKPFSLVPEFKVGVNKKRTLLIGCNRYKTRDAQLKACHD  
DVTSIKDFLVN VYGFPEPDLMTILMDDKHKSPHKNITEAFKRLAEQSQPGDAVFVLTGHGCRIMDSP  
IDATAESYDEALLPSDYEESGIIRD TLMFKTLFAPMKKGVTVTCIMDCAHTGVMIDL PYLWTSKDSKKEEQ  
QAKMSLNDFSFVRFLKVVKTLYESSVFTRIGKTVGAELAKQLSAADDETAVD SVASLETMPENDINDKDN  
AGILCSI AKLITCQPDEYSDEEHFDDTGSYDSR

>Tnitschioides1 CAMPEP\_0200188848  
MGRFFKKIFGSSGAGSKISDQQQARDAFEEQKPAGLRKDIRMISGCEDAQTSADVSNVASFALPDPAGRAG  
GACTSTLLRILYKDDTVPEDDLSYTVLTVQMRDDLAAQGFQIPQLTASNPIDVNTDFDLVPATATGTRRA  
VMVGINYVGHNPGE LRGCHNDVLMKRYI IAVHGFEEENIHVLMDDGEHEEPTRANLIAAYEKIVAETESG  
DAIFLHYSGHGTKLRDDDGDEDDGYDEALVPLDFKETGMIRDDDLFDIVCKPLADGAHMVSLMDCCHSGTI  
LDLPYIFKADGSSTQMQLDDSIDLDGLLQQFGGAAISFLQNFLG

>Tnitschioides2 CAMPEP\_0200208386  
MSDFDAQVQKLIPAEVNMI S GSHDSQTSADVYNVSQFQLPDPKGRAGGACTSAVLKVLYNDSQEPSEQLTW  
VTLLRRMRSVLSMGMFQDQIPQLTSSRMIDVNKPMYIVPPNANGMKRAILIGINYTGQRGQLSGCHNDVDNI  
SEYLQKVHGF EATNMLRLVDNGVDHAPTHANIMSAFSRIGDYSKAGDVVFLHYSGHGSRVPDRDGEDDDGY  
DETLPVDFERSGQIVDDDI LRKLVKPLAAGVTMTCLMDCCHSGTVLDPYRFADGDVW

>Tnitschioides3 CAMPEP\_0200209970  
MGDLLEKAKRAIPADVRMYSGCRDEQTSADVSNVTSFSLPDPQGRAGGACTATMLQILYADEKKLEEDLTF  
QEVLLKMRDVLKEKGFQIPQLSASRPIDIKEKFDLVPDNIAGTKRAVMIGIN YVGDNPGE LRGCHNDVFN  
MKKYIQDVHGFEDENITILMDDGNHTVPTRENILAAYSKIVEESQPGDAVFCHYSGHGKLDKDDNGDEADG  
YDETLVPVDYKTAGQIRDDLLYKNLVGGFKEGVFCTFVMDCCCHSGSVLDFPFQFQADGESDSMEAPADDFD  
GPLLSLAASLAGGQNI GTDPGKLLAMCGSCIVS

>Tnitschioides4 CAMNT\_0046182537  
ALPYNPHYQPSPTAVQPVT AQPVMAQPVAAQSFNAQSVTTPQPVMAQPVTAQSFNAQSVTTPLPVMAHPIT  
AQPSNAHSVTTPLPVM AHPVTAQPVGGQPAIAQPVMAQPVMAQPVMAQPVMAQPMSTQQQPVVAQAFVPPQYQQPQ  
LVAPVPAQVYNPYAVPSLPPPSLNTSAWFDYD KDRSGSLKSEIMQGLLYTFGAKTPNEQYSLQGTVDS  
IWSIFDTRNGTLDKREFCAPGGFGESLQAAMASNGKATATTPHQPVVSSTGNSWTCTKCTFANSMADSYC  
KMCQAIRVGGGGATNNAIAPAPGVYVANSSSAAATTIYGGAATNNTITSVPGVYVPGSSAAAATTTTNSWN  
CTKCTFANATSQSHCRMCQFPRNGTTMNASAPVNTKIRVGI PQDSSPGQRIKIQT PAGKSEIAIIPRSEW  
VFLNTGQPAFDYSIATTSTTTTASAVSVPAPTNTTIRVGI PQGTNAGQRIKIKTPAGGSEIVTVPQSQW

YLNTGQAAFDYELPTATSASAVHVQSSSQHPWQEQITKSSYQSPAPLGVMTVPISIGSMIQPSGRRA  
LLIGINYTGTRAAALRGCINDAKNMRNVLIRKHAFPGDTCHEMMLTDEPSRGRNYQPTYSNIRRLQWLLQG  
VSQGDVLFHFHSGHGAQVPDKTGHEADGLNETILPLDYENKQITDDELWGSIVYPLPAGARLTALMDCCHS  
GTGLDLPFEMYKQNKHNKYNQSSWMEDLNPAHSQGDVVLISGCKDDQTSADAFQQGTAGGAMTQAFLTAY  
EQHPYCTYPELLQAIHQALKQRRFTQRPQLTASQPFNTQERIFSLVEGIEPNHQSSIGRLKKKHIRPGRGT  
GGGGGNAGNMLLGAAGIFGALALGDALFDF

>Tantarctica1 CAMPEP\_0200089382

MSYQDNIDAEIPAEVRMLSGCHDTQTSADANITTFELPDPAGRRGGACTAALLQVLYNDNDGDPQDCSDQS  
WVEVLRAMRNNLAAEGFTQVPQLSSSRMIEINDPMQIVNNPQGTKRAVLIGINYVGHDPGELSGCHNDVAN  
ISKYLGKGLGFEQDNMMVLMDDHRHEEPTYRNIMRAFWDWIVSESQPGDTVWIHYSGHGGRLDQDGEDDG  
YDETLCPIDFQTAGQIRDDLLKHLVKPMKGVLMTCMLDCCCHSGTVLDPYNFIADGEHAGMERNENFDL  
GNVMGMLGAVAGAAMASGAVGEIADECCVIL

>Tantarctica2 CAMPEP\_0200100074

MGGFNNIKAAAIEKVKEEIFASLGLDGGDDGDGGQMTTEQFEKSKPDELKRDIRMISGCQDKQTSADVSN  
VSSFQLPDPAGNAGGACTSTLLKILYADEQVPEEDLSFTEVLEQMREHLSTEGYTQIPQLSSMNPIDVNHK  
FDLVPDTATGTRRAVMIGINYVGDSPGELSGCWNVDVLMKNYIMDVHGFEEENIVILMDDGENIEPNYENI  
IDAYKAVVSQSEDGDAIFLHYSHGHTKLRDDNNEEADGYDEALCPRDFQSSGMIRDDDLYEILVKELRDGV  
HMTSLMDCCHSGSIMDLPYIFKGDGSQTEMILDPENMMDAFIEQITGKLMFLMCKLGL

>Tantarctica4 CAMPEP\_0200125594

MTEEKRPSKSSSHRSNPPPPRRQNSSGGGKERSKRENNGGDAGRSVGTKSMATKASVRSRSTHETN  
HTNRSSRSKSRPRESPGKSRSRKSRPREAPRESRSTLDIKSKPSDEKSRSRKSRPRQSSSKSQPDDTR  
SSSNKQSKSPKQSKKSPKPKHNSNTTKSKSHNNGNGTRSSLKQPSVKKREKFGNFAHKAIIPAAVRMISG  
SHDAQTSADVSNISSQFQLPNPAGRSGGACTAALLQVLYQSHEYGKDDISWVDVLRQMRDVLDEKGFQIP  
QLTSSRMIDVHDPFAITPTSFSHKNTQRAVLIGINYTGQSGELSGCHNDVHNVAKYLMQVQGFKKENVTI  
LMDDGAHKPPTKAGIVNAYKRLVKEKSGEDVAFCHYSHGGRPLPDDNGDEEDGYDETLIPVDYDKKGQIRD  
DDLLKILVHPLQEGVTMTCLMDCCHSGTVLDPYRFTSDGDLEEMEINDRTNFKDALWTGMGLGVGMAAGN  
AIGNAVVSAVTPDPEMMILGGGPNAIHEYSDTDCCVIS

>Tgravidal1 CAMPEP\_0200700714

MSGEKRSSKKKTSVQSIRTHPPPPPPRPNRQSSSSSGIGKEKSKRENGGSGRSVGTKVSSTVRSRSTRE  
SSRTNRSTRSKSRTRDAQSSRSRSKSRPRETPREGRSQSGRSTGSRKSKTTGDRSRSRSRARPQDGRSS  
PTKQQSKNNSNPKSISSSKSKSQKNGRSRSPKQTSSTKKREKFNASNAQQAIPASVRMISGSHDSQTSADVS  
NINSQFQLPNNAGRSGGACTAALLQVLYQSHEYGHDDISWVDVLRQMRDVLNEKGFQIPQLTSSRMIDVQ  
DRFAITPVDGFSFSQKNNTKRAVLIGINYTGQKQKELSGCHNDVKNVARYLSEVQGFKKENVTILMDDGNHKP  
PTKTAIIISAYKLVKESKKGDDVVFCHYSHGGRPLPDDNGDEEDGYDETLIPVDFEKRQIRDDLLKILVS  
PMSEGVTMTCLMDCCHSGTVLDPYRFTSDGDLEEMEMNERCNFKDGLWSGMGLALGMAAGSAVVDVLTTP  
PEMMILGGGPNAIHEYSDSDCCVIS

>Tgravida2 CAMPEP\_0200710618

MGGFNTLKNQAIAAAKEGMLSSLGVDADGSDGEQMTKSQYEEKSPDELKRDIRMISGCQDKQTSADVSNVE  
QFELPDPAGQAGGACTSTLLNILYADEKVPEEDLSFAEVVSTMREQLSEGSYTVQVPQLSSMNPIDLNAKFD  
LVPDTATGTRRAVMIGINYVGDVDRPGELSGCHNDVHNMKKYITDVHGFDEENIRILMDDGENEAPTRSNIIA  
AYKAVVDEAEEDGDAIFLHYSHGHTKLRDQNGDEADGYDEALCPRDFQAGMIRDDDLYDILVKALPDGVHM  
VSLMDCCHSGSIMDLPYIFKGDGSQTEMELDPENMLDAFIEGISEGLVDLFLKSLGL

>Tminiscula1 CAMPEP\_0201031444

MSYQDRIDAEIPADVHMISGCHDTQTSADANITQFELPDPAGRRGGACTAALLRVFYNDGDDDPQDFQGGQS  
WVDVLRMRRENLAAGFSGVQVPQLSSSRMIDVESPMRILNSPSGTKRAVLIGINYVGHNPGLSGCHNDVRN  
ITKYLGKGLGFEFSNMRVLMDDGRHEQPTYRNIMRAFWDWIVNSQPGDTVWIHYSGHGGRLPDQDGEDDG  
YDETLCPIDFNTAGQIRDDLLKHLVKPMREGVLMTCMLDCCCHSGTVLDPYNFIADGEHYGMERNENFDL  
SNLMDAAMGVAAAAAAGVAGDIVDECCVIL

>Tminiscula2 CAMPEP\_0201033658

XAGGACTSAILQVIYKEEQPSCEINTFMDVFLQTRVIVKSNQFEQIPQLSSSRCIDVNPQFDLMTNKGNE  
GTRYAVLIGINYTSHRRGRLRGCHNDVHNICKYIMDVGNVEESNITILLDDGTSTPPTRENIMQALDELTO  
KCQPGDTAFVHYSGHGGRVKDETGEDPTGFNSTLVPLDFNKRGVGHILDKELYEHLVCAMPSGTSLTCLMD  
CCHSGTVLDDL PYNFVADGEQTEMPVKDFPFVKLIMLRQALREAGVERLMDLRDSDKREQVKAAMAEL  
LARLGHNFVDRADFACGAKEEWRQERHEAGGNVFGGVYVLCDCNX

>Tminiscula3 CAMPEP\_0201021774

XELEGEATNTQYHQSIAPRIVTMGFFNKIKEAAIEKAKQEMLAQLGMSGDDEEGGQOMTTEEFERSKPEL  
RKDIRMISGCEDRQTSADVSNVSSFQLPDPAGRAGGACTSTLLKILYADERVPEEDLSFTEVLEQMRHLS  
SGGYTQIPQLSSMNPIDVSHKFDLVPDTATGTRAVMIGINIVGDNPGELSGCWNDVLMNKYIMDVHGFE  
EDDIVILMDDGHEIEPTAENIINAYKTVVAEAEEGDAIFLHYSGHGTCLKDDDHNEEADGYDEALVPRDYQ  
STGMIRDDDLYEILVKGCPDGVHMIISLMDCCHSGTILDLPIYIFKGDGSQTEMILDPENLDSFIEMLTGKL  
MDFMMKKLGLGGD

>Tminiscula4 CAMPEP\_0201050048

XSWARKGDSRSRNRNHPAKIAVILLRRRDGATAVAAGGREIKEMVRVQWGLATLHPCRDRLERARRRKF  
TIAPITIVGAEANPNRENROETALEANLDPEKRINPKTKTEAVAERIAAGTEEGIGRQIRIMTKLTNGETRV  
AAVANLDPDNPNLNRKTKVTAMLAXSPQKQSKKPSKHNNNSNTRSNSQRQHRNSGTRSSPAKPKQPSSK  
KRQKFADAAQKAI PATVRMISGSHDAQTSADVSNINSQFQLPSPAGKSGGACTAALLQVLYQHYENDEDED  
DLSWVDVLRMRNILLDDKGFQIPQLTSSRFIDVRDPFVITPTDGSFNYKHNTQRAVLIGINYTGQSGELS  
GCHNDVHNVARYLLEVEQGRKENVITILMDDGMHKAPTSAIILGAYKRLVKSREGDVVFCYSGHGGRLLPD  
DNGDEEDGYDETLIPVDYDKKQIRDDDLKILIHMPKGVMTMCLMDCCHSGTVLDDL PIRFTADGDVEEM  
EMNERCDFKDALWSGFLAVGMAAGNAVANAASALTPDPPAPEMMILGGGPNAIHEYSDTDCCAIS

>Toceanica1 CAMPEP\_0192891684

MGFFSSLKKAACDAKQKIYEELGISQSDAQPSGQMSREDYEANKPELDRKDVRLSGCADHQTSADVSS  
VSKFKLPDPAGSAGGACTSTLLKILYADEENPETQLSFTEVLETMREDLKGNRYSQIPQLSSMNPIDVSDT  
FDLVPPEATGTRAVMIGINIVGDSPGELSGCWNDVLMNKRYIMQVHGFDEENIVILMDDGHEATPTFRNI  
IDAYKIVISQAEEGDSIFLHYSGHGTMMKDDDGDEEDGYDEALCPRDYASAGLIRDDDLIDLKELPDGV  
HMFSLMDCCHSGS IMDLPYVFKGGIDSEMHLDPENLDAFIQQISGKLKEYIERRLRERWG

>Toceanica2 CAMPEP\_0192912886

XDDGALRTPHGGDDGKVLARAFYDRATDEEXPMSLAICEPYPAENKVKVLYSQKAGCYDVKRSLASQLLSS  
YRLTQALSIESFLLTGCRKMPDRQNSRRQKSTSGRRRKEDDAAKQKSTHRRRSSSRKRQPSTSERRSKSR  
GRKKTQSRDTRKSARTDVRSRKSKQPRTGVGSKSARTEKTKPDASSRSQKSRSGRNSQGGKRKSSGA  
KGRRAVGPNKTPSAKRSSHFAEEANKAIPALVTMISGCHDAQTSADVANLSSQFKLPNPAGKSGGACTAAL  
LEVLHCSSSDDEREMSWVDVLRMRIVLNKKGFDQCPQLTCSRMINVKDRFFITPPDFNEVNNTKRAVLIG  
INVTGTPGELRGCHNDCLNVARFLREQGRDENVTMLLDDNKHRSPTKAAIILSAYKKLVRESKPGDVVFC  
YSGHGGRLLPDDNGDEDDGWDETLIPVDFKTAGQIRDDDLFKFLVHPMPANVTMCLMDCCHSGTVLDDL PIR  
FTADGDLDEMQINDRCDFKSALYHGLVLGAGLAVGDVVASTVISGAVNAFTKPSDLDTAGMVLGGGHSMS  
DMIVATSFEX

>Toceanica3 CAMPEP\_0192912014

MSSFQSRIEEIPADFHMSGCDHQTADVHNISFQLPDPQGRAGGACTAALLQVLYRGDPSQDQSSSW  
VDVLRQMRNLAAMGYEQHPQLSSRLIDVNSPMRITNGHGGTRRAVLIGINIVGQQGQLSGCHNDVRNIA  
KYLSSMGFQQHNMTILMDDGMHEEPTYRNIMEAFKWIIVQESQPGDTVWIHYSGHGGSVEDDDGDEEDGRDE  
TLIPLDFQRAGQIRDDDLKYLKPKMRGVLVTCLMDCCHSGTVLDDL PYNFYADGRQTSMRNEDFDMGHL  
MEIAAFGVMTMAMASDLAGMAAGAAGFASAASGGGAEIILDECCVIL

>Trotula1 = throt11193 = GS1 CAMPEP\_0192965622

MLRERARAAARQRMDDFVDETFGPPSPQADDRDVEITDDDAPTSDPEFDQRAEEAIPANVRMISGCHDTQT  
SADVSNVDTFQLPDAAGMAGGACTSAILQVVYKEEPPSEDLTFMDVFLQTRDVIESKGFQIPQLSSSRC  
IDVQPPFDLMSNEYGNEGTRYAVLIGINYTSHRRGRLRGCHNDVHNICKYIMDVGVVEESNITILLDDGEA  
TEPTRANIMEALDELCKCEPDDTAFVHYSGHGGRVKDETGDPTGFNSTLCPVDFDQPGVGQILDKELYE  
HLVCAMPAGTSLTCLMDCCHSGTVLDDL PYNFIADGEQTEMPNQDFPFLKLLAMRQALREAGVETFRDLFD  
EEKREQLKASYDAAYNESMEGLGRDIGGGENFGRAARRERRQRNRRANRRKR

>Trotula2 = throt1069 = GS4 CAMPEP\_0192960494  
MGGFNTLKNQAI A A A A K E G M L S S L G V D A D G T D G E Q M T K S Q Y E E S K P D E L R K D I R M I S G C Q D K Q T S A D V S N V E  
Q F E L P D P A G Q A G G A C T S T L L R I L Y A D E K V P E E D L S F A E V V S T M R E Q L A E G N Y T Q V P Q L S S M N P I D L N A K F D  
L V P E S A T G T R R A V M I G I N Y V G D R P G E L S G C H N D V H N M K K Y I M D V H G F E E E N I R T L M D D G E N E A P T R S N I I A  
A Y K A V I A E A E E G D A I F L H Y S G H G T K L R D Q N G D E A D G Y D E A L C P R D F Q Q A G M I R D D D L Y D I L V K G L P N G V H M  
V S L M D C C H S G S I M D L P Y I F K G D G S Q T E M E L D P E M N L D A F I E C I S G K L V E F L K K S L G L

>Trotula3 = throt10365 = GS3 CAMPEP\_0192967966  
MSYQDQIASQIPAEVRMLSGCHDTQTSADANITSFELPDPAGRRGGACTAALLQVLYDDRNGDPQDFQGGQS  
WVDVLRAMRNNLAAGFSQVPQLSSSRMIEVNDPMTI INEGGGGTKWAVLIGIN YV G Q N G E L S G C H N D V H N  
I T K F L T N S Q G F E Q E N M M T L L D D G H H K E P T Y R N I M D A F S W I T R A A Q P G D T V W I H Y S G H G G R V E D Q D G D E D D G  
Y D E T L I P V D F Q S A G Q I R D D D L L K Y L V K P M R E G V L M T C L M D C C H S G T V L D L P Y N F I A D G E H L G M E Q N E K F D L  
G G L M E V A A G V A A A A A A A G V A D D I I D E C C T I L

>Trotula4 = throt16314 = GS2 CAMPEP\_0192949914  
FVVPLVVVPPSHHPTATTFSNTNSNTSTANVPPINI IMSGEKRSSKKT SVQSKSIRDNPPPPPPPPRKRQS  
SSSSGIGREKSKRENGGSGRSVGT KSIADTKVSKSTVDRHELVSRTAPIAAPAANPEREMP KAVAQGANLD  
PEKHREAVPKVAVPLAVGANPKLEEIGAAVAE P G H K T A A X S S P K K Q Q S K K S S N S K N D S S T K S K S H K N G T  
R S S P T K Q P S S R K R E K F A S N A Q Q A I P A S V R M I S G S H D S Q T S A D V S N I N S Q F Q L P N N A G R S G G A C T A A L L Q V L  
Y Q S H E Y G H D D I S W V D V L R Q M R D V L N E K G F E Q I P Q L T S S R M I D V H D R F A I T P A D G S F S Q R N N T K R A V L I G I N  
Y T G Q K G E L S G C H N D V N N V A R Y L S E V Q G F K K E N V T I L M D D G N H K P P T K S A I I S A Y K K L V K E S K K G D V V F C H Y  
S G H G G R L P D D N G D E E D G Y D E T L I P V D F E K R G Q I R D D D L L K I L V G P M P E G V T M T C L M D C C H S G T V L D L P Y R F  
T S D G D L E E M E M N E R C N F K D G L W S G M G L A L G M A A G S A V V D V L T P Q P E M M I L G G G P N A I H E Y S D S D C C V I S

>Throt14982  
EERNRERRSRNGGEGSSHQHGHNNNNNNNNNNNSRSTNNRSDRDNGVGRSISPLHSSVSGSNTSGNASGSA  
FGSHSDL SRVMPGGGATSPGLSSIASTKIADDTVQLDLPADLMAYLQVVANNSSNLPLTRRDDPELGRTV  
SSLTAE EYAFKCAAFVPSNVRILGGQFGKYGRVWDLPTSEEFVDVT DGTREPGISHGGSCCNALLKAMYDTE  
SEVNNIASPTVDAKDLFD D D D D D E T V D T A G Y T V D R T I A S F D T L V L N D G S N A S A M S W A Q L L R K M K P E M Q V G  
F N Q V P A V T S S Y F K D L N E P F S L V P P D F K K G V N Q R A L L I G C N Y R R M P D A E L K A C H D D V R S V K D F L V N V Y G F P  
E S P E L M T V L M D D K K H K H P T H S N M T Q A F K K L A E R S Q P G D A V F V L F T G H G C R V L D S P I D E S A E S Y D E A L V P A D  
Y E E T G I I R D T L F F K T L L A P M K K G V T L T C I V D C C H T G V M I D L P Y L W T T K G D K G E V L P K M S L N N D F S F V R F L K  
V V K T L Y E S S V F T R I G K T V G T E L D K Q L P G R D D E T V I E T V G S L E T M P E N E Q P E K K K T F F E K L C S P A T L A Q S I I  
N C T L Q A E D H Q Y S D D E A T L G R N N T L D E E H S Q Y S Y D S

>Throt6337  
KIKEDHDSRQIIASNFSLTSDPSETTNDRTAPTPTS AANDPLQSSSNFHLNPVSDI STMFGANGKKYADV  
IASKLEKAVGDHLSKAPQSTESATERMGKVTGKRRA LF I G I N Y F G Q K G E L R G C I N D V H N I Q G F L T S N F R I  
D E V M V L T D D Q K D P R Y I P T R Q N I L N A F K W L R N G A K A G D S L I L H Y S G H G G S V K D T D G D E E D G M D E T L I P V D Y Q  
K A G Q I V D D E V H T V L C R G L P K G V R L T A I M D C C H S E S M L D L P Y I Y T I N G D L Q I I E T S K Q E G I V T L I G A G T R F L  
L D G N K K N A V S N F K T G L G L L M S G G G G G N S E A R E K T I K T R S T E A D V I Q I S G C R D S Q T S A D A Q I A G Q A T G A M S H  
A L I S C L K K N K N Q T Y T Q L L Q S M R G T L E G K Y T Q I P M M S A G R K L V M D H P F T I

>Throt7051  
FTTLDYKSAGGSKVKISQHKMGFFKKTGALSSYPARRNRLQNEQNHNPTAANPPSNYGAHNPTPMPASVY  
QTNGMSVAPAAATTTTAAVAAPYNAVAYGAFPGNNAPVQATVYIPGQASTAPT PVSTAAPVQATAYVPG  
TVSSIPPAATATAQVHTAAPVQATVYNPNNDSTPAANPSFLGAQQRASFNNNGNGNYNANESSFWECVCT  
FPNLRTEPNCKGCGAVIPPGMLYSAASSATAQPPPTQQRPPQDAYNNITSQMNSMGLEGAKIGGAGTTSAG  
APSSAANTGAGVMRVH I P L N M T T G Q K I K V R S P D G K E V V Q T I P P Q S Q W H Y D G T Q P F F R M Q F G G S P A P P T T A Y  
G R D D G N N H N T N A P T M A H D V P P M H T T A W R D F C H A P G A G H Y S S P P L A L Q S V P S T P I G S G M P M R P N G R H K C L I I  
G I N Y T G S R A Q L R G C I N D A K N M Q G L L R R N G Y P D D G S H M L L L T D E R N R G R E Y Q P N K E M I T K A F A W L M K D V R K G  
D V L F F H F S G H G G Q Q R D T T G M E V D G Y N E T L I P V D Y D R K G Q I S D D V L W G S L V Y R L P E G A R I T A L M D M C H S G T G  
L D L P Y D Y N V D T R S W T E D I N P A H S A G D V V L F S G C E D A Q T S A D V A G A G R Q A G G A M T Q A F M G A Y N T C N N D A A T Y  
H E F L T A V K K E L R K K K F S Q R P Q L T S S Q R F D A K S R V F A L G Y A S G G C G G G G S I P S V I E P N H N P K I G R M K R Q N I  
R R Q R H G L G G G G G N N F F G M M A G A A G A A L F A D A L F

>Tweissflogii1010-1 CAMPEP\_0193034156

MGFFNKLKNAASKAIKEDLLKSMGIDDADDGGMTRDEFEANKPDELRKDIRMISGCADRQTSADVSNVSSF  
QLPDPAGRAGGACTSTLLKVLVYADERVPEEDLSFTQVLEQMRRHLKEGGYSQIPQLTSMNPIDVEAKFDLV  
PETATGVRRAVMIGINYVGDPEGELSGCWNDVLMKKYIMDVHGFEEEDNIVVLMDDGENTEPTRENIIEAY  
RTVVAHSEEGDAIFLHYSGHGTCLRDDDSDEADGYDEALVPRDFQENGMIRDDDLYEILVKDLADGVHLVS  
LMDCCSGTMDLPIYIFKGDGEMGEMILDPDMNLDAFIEQITGKLIIEFLQSRFS

>Tweissflogiil010-2 = 36-1 CAMNT\_0037344015  
IAHNILINRYFLIGVVFQSLQTSFQRIMAGEPAKRKSSSRDDAPPKRSASSASHPKHSSSSSRQRSKSDADR  
HDKSSSSKNGGDLKRSQSSRHGQPKSKHPKSKSPKPKPQDGGSKSKPSSNKKSTNKDSQKKSASASKKSK  
PVENYGTQVATNGSANKAAAAAMNEKKAQKFNKDAQKAI PAQVRMISGSHDAQTSADVSNINSQFQLPD  
PAGKSGGACTASLLEVLVDIHNGLDGVSWVDLLRDMRDVLEDKGYEQIPQLTSSRMIDVSHPPFAITPSS  
FDSSKNKRAVLIGINYTGQSGELSGCHNDVKNISKYLREVQGFKKENVTIIMDDGQHKEPTKANI IASYK  
KLVKDCSGDVVFCCHYSGHGRLPDDNGDEDDGHDETLPVDFEKNQIRDDDLNMLVNPMPKGVMTMTCL  
MDCCHSGTVLDPYRFTADGDLEEMEMNERVDFSDEFWSGFFATAVAVAASKVDPPAEMMILGGPNAIH  
EYSDTACCVIA

>Tweissflogiil010-3 = 36-2 CAMNT\_0037378133  
YVLINYCSITFSNHIFQTLSTMSFADKVAESIPAEVRMISGCHDVQTSADANITAFELPDPAGRRGGACTA  
ALLQVLYDETNQAQDNSADMSWVEVLRAMRENLAAGYSQVPQLSSSRIIDVNEKMDIVKDPEGTRAVLI  
GINYVGGQSGELSGCHNDVKNINSYLVQEVLFERENMKVLMDDGMHEEPTFENIVRAFKWVVKESAPGDTVW  
IHYSGHGGRLEDQDGEDDDGYDETLIPIDFQSEGQIRDDDLKYLVPMPCEGVTMTCLMDCCHSGTVLDP  
YRFIADGDHMEMERNENFEFKDFLTAAVGVAVAADIAGAAGALDECCTIL

>Txantarctica1 CAMPEP\_0200975774  
MEEAIENAKKAIPAEVRMISGCRDEQTSADVSNVASFQLPDPDGSAGGACTSALLNVLYADHKKLEEDLSF  
QQVLLKVRDVLKEKGFQAQIPQLSSSRPIDIKNTFDLVPNHVTGTRRAVMIGINYVGDNPGLAGCHNDVGN  
MKDYIQDVHDFDEENITLLMDDGEHISPTRDNILAAARRIVEESQPGDAVFCHYSGHGKLRDDNGDEADG  
YDETLVPVDYATEGQIRDDLLFKNLVGGFREGVFCFVMDCCCHSGSVLDLFPQFKADGENDSMGVSSGFDF  
NSLLSMAASMNDTNMFADIASNPQKLLALCGSCTIS

>Txantarctica2 CAMPEP\_0200957050  
MSDDKCDKLCGIDMDGICLPSKDKDNKLVQAEEGSCRQSPKSASDMEDEAETRDINETENEDTATEDKVR  
KDAATAYSDNSGTDNKNRSIQADVFMLSGCEDSQTSADVSNVSSFQLPDPNAGRAGGACTSALLKVLVSNQA  
AVTDLTFVKVLTVMRTVLSGGFSQNPQLTSSQEMDVNQFYIVPPRCQGTKRAVLIGINYTGQSGELSGC  
QNDICINIKDYIMNVWGFEEENIVILMDDGNHTNPTRSNILEAYKNLVTNSEGDAAAFCHYSGHGGRVDDDD  
RGEEADGYDETLIPVDYDTSGFIRDDDLVSNLVCAMSGVTLVSLMDCCHSATVLDLFPKYGADTTDTNQI  
GSFVTFGRGKIIIIICIIIAVVITIVVLVALYLA

>Txantarctica3 CAMPEP\_0200971514  
MGRFFKKIFSGVREALSDKDGARNEFEDKPKDALRNEIRMISGCEDSQTSADVSNVSGSGFSLPDPAGRAG  
GACTSTLLSVLYADEQVPEDDLSFTQVLNAMRVNLAEQGFQIPQLTSSNPIDVNADFDLVPANATGTRRA  
VMIGINYVGDPELGRGCHNDVLMKKYIMHVGFEEDNITILMDDGEHDSPTKENILEAYKKVIEETEEES  
DAIFLHYSGHGTQKVKDRDGDDEADGYDEALVVDYQEEGLINDDLIDILCKPLAKGATMVSMLMDCCHSGTI  
LDLPIYIFKADGSMPEGMQLDESDFDGLIQSFGGHVIGFLTNFLK

>Txantarctica4 CAMPEP\_0200971326  
MSDFDAQVAKLIPAEVHMI SADSQTSADVYNVSQFQLPDPQKAGGACTSAILQVLYRDDQDYSNELTW  
VALLRKMREVLNMGYDQVPQLTSSRLIDVNEPMYIVKPGTDGGVKRAILVGINYTGQSGELSGCHNDVEN  
ISGYLQKVHGFPPDQMLRFLDNGVDHSPTRANLMSAFERIAAAYSEPGDVFVFMHYSGHGSRVKDYNGDEDDG  
FDETLVPVDFESNGQIVDDDLKDFVKPLKSGVNMTCLMDCCHSGTVLDPYRFTADGDVVRDEGFGGLM  
DSPENVLALCCCLALLADFL

>Txantarctica5 CAMNT\_0047144487  
QPHNNNIITPTAPFNSTQTAAPTRPPPSLSNKSASFVDFYDRDYSGKLSRDEIIRGAVETLSVPYGSKKY  
NDISNTIHSVWVFDTRSGSIERHEFCGPDGFESLQAMMTMNSQSTTTTQSKKKVRVGI PSYGPG  
KQVMVPSGGKTEIVTIPDRSEWIYLNLTGQATFDIEIPTSSHYSAVQQAKPQKPTTMTKTVRVGIPKGSNP  
GSKVNVPTS DGKTNIVTIPDRSKWIYLNLTGQPAFDIQVPTAQPPQAAHY SAGGGTDITTSASSYHTTSSS

ASLPPWKNYNDMIPASYQPPLGMKSVSVSPQSNLSFVKTSRRRALIIGINYTGDKRAALRGCINDAKNM  
KNLLLRNQFPNDGSHMVVLVDDSTSSNNHRPHTSNIFKAMQWLMQGVRRGGDVLFFHFSGHGAQVPDRTGHE  
ADGLNETILPLDYKKGQITDDEMWSLVYPLPAGARLTALMDCCHSGTGLDLPFYQKGGKTTNRYGMTS  
TSSSIRNANWIEDINPAHSQGDVVLFSGCQDDQTSADTFSTNTEAGGAMTQSFISAFESNPYSTYPEFLSA  
IQRSLRQRRFSQIPQLTSSQAFSAEERIFSFVDGIAPNRNPHIGRIKKNKHVRPGRTSDRGRGIGP

>Txantarctica6 CAMNT\_0047161225

FTLGGNNNKRALLVGINYIGQNGELRGCHNDVYNVQYLVSYHGYRERDIQILVDDYNNRSIFPTRQKIIS  
ALQYLVQSSVAGDAVYFHYSGHGGLLEPNFRSSSKKDYDETLFPLDFDQSGQIRDYSLYQNFVQMPAGV  
VVTCVMDCCCHSGSVLDDLPSFQPTHEVGDRLIPMGNTMTDLSNLAFLYILMGGTLPVGGFLFDSVTDTLQS  
SLGDGFLEDYQGTGMGNEEMMDQFTEGGEDTAAPYGEDEDIARQGENFNYYDDNDGGGEILAPPADAQENF  
GYNNNNNYEENQNNYEENQNYVDVGGDEGEEATNLPDCGSCIADVLNDLLSEGGEY

>Hsinensis1 GAUA01013815.1

MSSFYENAEKTIAAQVRMISGCEDEVQTSADVSNVSSFQLPDPAGRAGGACTSTLLKILYADKQAPDEDMSF  
QDLLLLKMREVLDEKGFQIPQLSSSRPMDVATKFDLTPEDFSGVKRAVLIGINYVGGQELAGCHNDVJNI  
KEYIMDVHGFEEENITVLMDDGVSDPTRENILNAYKELVASSEAGDVAFIHYSGHGGKLRDDDGDEADGY  
DETLVPLDYMSAGQIRDDDLLTTLVIPAAGVFMTSIMDCCHSGTVLDPYNFKADGEQTEMQESEGFDIFS  
PMLALLLA

>Hsinensis3 GAUA01014143.1

MSNFDQKVEQMI PAEVRMISGCADSQTSADVSNVSNFKLDPDPQGRAGGACTAALLQVLYRDESAPAQDL SF  
VSVLRQMRQILDAKGFSQVPQLTSSRIIDVQNKFTIVNPKEATMGGTRRAVLIGINYVGGQQLSGCHNDV  
KNMKKYLQVHGFEEHNMTILMDDGYHREPTYRNIVNAYKDVVRQSLPGDTVFCHYSGHGGSVRDASGDEE  
DGYDETLIPVDFQTAGQILDDYLLENLVKPLSRDVLMTCLMDCCHSGTVLDPYRFTADGD

>Hsinensis4 GAUA01006240.1

VGTQVADDQIHINLAMADLMAYLQVVASNSSNLPLTRRDDPELGRTVSTLTAEYATKSAAFIPSDVRVIG  
GSFLKYGRVWDLPTSEEFVSDGAQEPGLSYGGACCNSFLKVLVDIENEESVIMGQSEYMDSNNLFDDDDDE  
NISVSNDSCTSLDLGNDEGSGVTWTQLLRKMKEEMREVGFSQVPTITSSRKFDLNQPFSSFFPENFDPTQNK  
KLSLLIGCNYNNAVTDQIKASHDDVRSVKDYIVNVHGFPEKKGAMTILLDDKEHSPHTSNIIQAFKHLAE  
ESKPGDAVFIQFSGHGRVLDTRLDSEGECEYDEVLIPSDFTTKGLIRDITLMFKTLLAPMRDGVTVTILLDC  
CDTGVMMLDLPYAWTTKNDRLDIAPPKLSLNDNFSFVRFLKVVKTMYEMSTFTQLGRTVGSALN

>Fsolaris1 Scaf102 GAX16243.1

MGFLSRALKETFEQEKPPQLRGDIRMISGCLDSQTSADVSNVQSFQLPDPAGEAGGACTSALLNIVYKDDH  
NTAADLSFTEVLTQMRSMKAKRYSQVPQMSASREIDVNTKFDLVPDNATGTRAVLVGINYIGHSQGVLS  
GCHNDVKNMVDYIKDVHGFEEQNIIVIMDDGEHPEPTKANIVAAYKKLIEESQPGDCLFCHYSGHGAKIKD  
DEQGEKDGDEVLVPVDYEQAGMIRDDDLFDILIRPMQGGVSLFCLMDCCHSGTVMDLPYIFKADGIFEN  
MEIDENFDFEKLFKKVGEVAVRELGNVKNKYLDKDL

>Fsolaris2 Scaf183 GAX22319.1

MTDYAERIEHAIPAEFHMISGSHDMQTSADVFNQSFELPNPAGKAGGACTSALLQVLYKDNHAASSQMSW  
VECLRKMRSELNRMGYDQIPQLTSSRLIDVNKPMPTIVPPGSTGHRRAILIGINYIGQKQQLSGCHNDAMNI  
KKYLINVHGFKESEMLILMDDNKHHPPTRRNIEDAFQRITQYSQAGDVVHVHYSGHGSRIPLDGDGDESDGY  
DETLVPVDFKSAGQIVDDEILKLLVKPMKAGVTCTVLMDCCHSGTVLDPYRFSADDSQMRDPRMNLEKY  
LGKFDVQTVLCLALLACCLADLLN

>Fsolaris3 Scaf132 GAX18784.1

MARGNPTISDREFDQVRKQVIRSHFHMISSADHQQSEEAYHAGKFQLPNPAGKAGGACTSAFLQAMYQRGE  
GANWVETLQEMHDILQGMGYAQTPLTSSRLIDVRKPLQIVPAGSGRRRALLIGINYVGGQELTACHNDV  
HNIREFLTEVYGFKESEMLILMDDARHNPPTRRNIEDAMIRLTRYSQPNDAFVSVFSGHGGNTRDTSDEA  
DGMDETLIPVDFRTEGHIVDDDLRLLVKKPMMDVHVTVLMDCCHSGTVLDPYKFGANDTRVQRESGFNL  
DQVHESQLTVGSYHAPGTVLSSWSLHGDKEKPPKEEKKSPKSKKKKKAATFQPKKKKNKDMTKVEENEQQ  
EVGPKMVGQAALPVRASKKSAAPAPGDKKCSVM

>Fsolaris4 Scaf78 GAX14314.1

MGNSDSKPEVIEIPLPGAVETLQOQDQGEVDHIDPIEASTSRNESRDERDTQDNELPVTKIRDDQVHVNLA  
MADLMAYLQVVANNNSQLPVTRRDDPELDRIVSSLSSEYARKSAAFLPADIRVIGGTFTRYGRVWDLPTS  
EEYTATDGALEPGRSYGGACCNTLLKVLVYDSANDAAGAAQSEAAAESLFDDDDDETDTDPLPKSPKSGISL  
DFGGQSSVSINWIDLRRMKVEFKEIGYAQAPKVTTSRKIDLNKPFSLTPENFNPEKNKRSLLVGCNYHE  
LKDAELKASHDDIRSMKDYIVNVHNFPEGKEYMTVLLDDGEHPPTFMNIVEAFKALSEESQPGDVVVFVQF  
SGHGGRVLGDPDQVGTIYDEVVVPSDYKSSGLIRDITLMTKLLAPMRYGVTVTIIIDCCDNGMVLELPYCW  
GTMHDKKESI AKVSMNKDFS FVRFLKVVKTLYESVFTQLGKT VGSALNPLSPLEDVVSRRREKEKNSEKR  
NTKASKERGDTIFDALAHACTTVRFDDRVICRTGKTDNSVEEESK KASSDAGSLIEKVLNCTMMERDEDFS  
DDDSFKSNSYDVGNSFDSLTEEDEPHRSRRRRR

> symbA1-2 GAKY01119793, GAKY01119787, GAKY01119790  
MGNAGCCSSSDGNPQFEILAAPRDIVGRK KALLVGLNRYNRTRAELHGCINDVNNMQQVLVKQYGFKLEDIL  
MLNEDQDKSQWPYK KVIIEGLQWLYKDAKAGDLLFFHYS GHGSQYQLD KKGMPADCICPLDCLDKKWP  
EAVILDTEIHQELYDPLPKGCKAVCIFDCCHSATVANLCETMVVQEGPMTAARKEKMKALTDQKNKAAATVRF  
YQDINSKGLDL

> symbA1-5  
GAKY01160523, GAKY01160524, GAKY01160525, GAKY01160526, GAKY01133546, GAKY1133547, GAKY01133551, GAKY1133554  
MLAPPERDEFGKLPLEDTTTEAPPEDDDGLLAPEETDGDHLDEIPEAPREVGSYQHQQHHYS GHHQYGHHP  
YVSQLASYSGHGHGYPALASYSGPGMYGQAGDSYSGYMY SADGFQQLYQPYSGYAYHLSGLGMAPMAP  
QPSQHVQISSGQAGQMVTS PSHQAAPSKPAK PETA AKLHV TGQRRAVTVGVNYIGTENELRGCINDSDTFI  
TLLTEDFGFSVSDIRQLRDDHPQRMPTRKNI SAALQWLKVGAAAGDHL LFHYS GHGSQRRDSSGDEADGKD  
ETIVPCDFNRSGMIADDELRRMLVDGLPKGCRLTVIMDCCHSGTGMDLSYKAKVLHDGSLTIRAVSSRQRH  
PTGAEV VLLSGCRDVQTSADI SGGVAGNKAAGAMTTAFR KVISKKRDISYHLLLEMRSLFKQHSFDQVPQ  
LCMEFHLNFEEPFLEADPPVAQPPAPLRSTQRRALTIGINYFSLTPGQGR LSGCINDSETMIAVLKETFK  
FEDGQICRLRDRRTNLMPTKANILSAMRWLTQGVGSGDELFLHYS GHGGRAADRSGDEITGQDDTLIPCDF  
QTAGQISDDELHSL LVEHLPEACRLWVLFDCCHSGTALDLAFKVTAS AALXLD SRRLRCTKMRSRHRPSG  
RPATPANGEV VMI SGCKDDQTSADI QSGSSAHKAAGAMTTAFRHVVSPTI SCEDLLLQMRQFLRRNSFAQV  
PQMSSDKYLQLDSAFTNYQTKRXXXXXXXXXXXXGRCAYGISATACRQRDGRGHTHSSTRGTDSRTAAQVAF  
NACQSAVSCRMQHGDAAATVAPSKSRRAASGLDESKLVRPLTSSSSEHLAVQRDRKS

> symbA1-6  
GAKY01019324, GAKY01019325, GAKY01019326, GAKY01019327, GAKY01019328, GAKY01019329, GAKY01019330, GAKY01019331, GAKY01019332  
SSDLAPLAASAMGKVC SVLSGRPAPADICAVIKEAEHRAEEWDCWAFGDSRDVSPKAAKQEPLTGARRSL  
IGCNYAGTSNELHGCANDVRRMIPVLAKLGFPSDGGSQVLLDEEGVDGPKPTHANMLEGLDWLVAEAQPG  
DALLHYS GHGGREPAEEGGYHETLVPLDFETAGMLRDTL FERLVKRLPEGCR LTCILDSCHSAGALNLPY  
IFVGT EELRKAVAGEAVRMALAMRWKSDLEKWRQSSKELFGDVSSLGKNLWKMYQDQSGYVTDKETTK  
GVAVGEVVAITGCRSDQTSADVGDVSTFGLKQVSGSAGGALTSALVEALEGQEELTYAELLERIRQELARK  
GFSQVPQF

> symbA1-8 GAKY01116216  
MANFMDELATGSRRTWRDLCKKETPTVGS DGM LKGIWREAVIAAVACEKAGKAGRFADGPAGQVLDYLLER  
GFNKFFTNAEQTEEAHAGRIRPSMAPSGAGAAIDSWSGGK PHEYRPGKDDGKPKGSGDLQIRCGNCGNV  
YGVAVPPGTAPGATVQARCPHC GTTNQAAMP HGGGSPSSPMKFTGGGAPPRPSGRQ KALLIGVNYFGTRAE  
LRGCINDVHNLFRLLTETYGWQAHNIRTLTDDGRGGGMPTRH NITQH LRWLAEDAMP GDVLF FFSFGHGAQ  
KEDPQGFEE DGMNETILPVDFEHAGMMTDDEVS DYIVKPLPEGVRLTSVMDCCHSGSGFDLPFTWDP  
RRGMWREAVNPF LCRGDVLMFSGCEDDDTSSDAASMYAAPGGAMTTAFCDVLRNRPRIYPELLQLLHRHLSMGG  
FSQRV LSSSQQFSLDRPFSFDDIHPNMNSQLGRIFRQRFP PRPRPMSG PLADMLG PLGMLAGGLVVGALA  
GEALEGGVGLLGALFG

> symbA1-9 GAKY01183850, GAKY01183751, GAKY01183753  
KRLKPSVWARETMGAGDSKCNCG LCHCCGDGPLEPWRDSGGCIRMLIIALDYDYAPSAELTCTKDARTMYR  
MAGRAGVDDITVITDKAGVGDPSFPTRSFVLRHMRQVAKRCEE GDFVWFVWAGHG VNVPDFNGDEKDGFDQ  
AFVTPDVTGRLTESAVLIDDEFAMALDTFVPDGVRI LCINDCCHSGTICDIDSFMYKHDIYSISASQDNEE  
AEDMGE GVLSTALRRAVRTLSVEYGSQEF S IMDV FQRCKRFAVRLTGEQNINLQYSGPKPSVVAWPLCFP  
WWTYLQKAGLMKVDIQEFAEDGLDSDDEDWTVPVAGSPATTS PFALTPGAGVRTNG

> symbA1-10 GAKY01049302, GAKY01049303, GAKY01049304, GAKY01049305



MGKRALCVGVNYPGQEYQLYGCVNDCLDWERMLKEAYEFEETRVLIDQYPDGTPTESGAQLPTRANILAQL  
GGWLVAGAQP GDVLFVVFAGHGCQVRTNERELEALVPGDYRDSALILRDEVHALMARLPSGCYITMILD  
CCHGAHMLDVPCSVDTSTGPFVTVHQTARTARPQEVSRTHEAWMQAYVDHARSRPRFIPTVTASGRTRKRSPEGA  
GAHVGRMTLNPVTAFLCAAARPFENARDANIKTYQCGVLTFCIHQALQDLQYRCTFEQLLERAANKMEDI  
RNKYMRRMDQTIQMSFCPNSAPSAVVVFDARYAPVAQHRSQLAQQQNMSPPENLRS PGAPSPEPVRQAST  
EFVPSPGYREQPDTNAVGGEVVGVGIVYVQLFSCSDLRPQGMYGQCDPYVKMTCGGVTHQSTVKRNSTHPT  
WGDEENKFTFKASDCQVEMLFIEVRNAGRDELIGRVDVPLRSLPSMTWEERRQFLQNGGEVEFRVALYPER  
AAANLRPQPGLGMGLGGPMGPMEQQPPAGTGYPEKPRPPSPARDLGP SLMGEYDLRAPMERRPMDEEPL  
LENIFGKPNLFAAMPDLMSQLSTNAPTGFHEVLP AIPQVGG LSTPALGGLGTPVSGLPAPATAMPAPAAPA  
TSRLGVASYTPPPAACFTPPSLLPTAEVGR TASRGLSLEGGYSTGGMAAAKMNTASTAVPTPQVPGSYTYS  
TPSPFTYSQAQPGQSALGSNLNAASYPYSSSGT PFTGYSQQIIISGQTSQSALGTDLASYTYTAPS YTTSA  
PASLTSYTPQGQIIGTTAQKALNADLSAGAYTYTSAPTALFTGYSQPGQSTGAYGARLATPSYQPPYQVLS

>symbA1-11 GAKY01048077,GAKY01048080

MSGWSPAAPRPFSPAAGAAAASGASGASAMGSRVFGPEVRHVEAPASEKVNQLRRSFTSLQAEMQLSFQR  
QDGEVASEPFGAFLPNSGREGVLAPVAGGSMALGSSSSLASTVPGGAADVSPSNAKSETGELDVWLKEKAQ  
KIKDHVTEMANAQRRAEDVGRSLQDHLQDLAE LRRMLRQAQADLAEELAKAQELERRRDALRQEQADLQSQ  
IVLREQEFQELRSNRDDVDRQLSRALAEQGLQKNNLEASSKSFQQAELAKDIDQSKRQVLELRSSLAGR  
KAVLEEKEKSLKMEETVRVEKEMVQREQLSAELDQTRTSLAEAKAVMEVSKRRFDEMEEKGRETTRKLEMA  
REELHGLRAEDGESPVSRSTVEDAKA I LAQKTAKLNQQTLOVEKLEKELQDNREOLEKQSLRMAEVHAEATE  
FEMKSKCLDERKLQLQDDLEDKRLLVQQSLAEKDEQRR LAEARESCARDLAVLKDDEEQRVAEARTRYAQT  
ADELERDVAAKQHELQTAKSHAEI IQKVCSELEKTRSRRSLLQDRTAALQAAQARAQDLEELAGTEAEL  
ATAATELQRLEKEEVERATEIEDARQKLSEVQMEIETMQARAQTSRVDDLEATSRALAESLQKAGQERTAA  
REKQDALKVELHESES DLKKAEEVASLTGELEKAQSEAESL TEQVNNLLQSSSGDKSKAETLQKSVEANN  
KELDATRGLLVTRQLEVEALHQVLDNENQSHRQELEALEAAAEASTQSSQELAQQRLRELERRRDEAADALA  
AAESHKLAVEQEI QKVIAETERVTKETYTSL SLLKAQTPQTYAQGAEQKPDPEAVKLRQLKRQVEAEAQR  
VANLRSDLAAREVEVERQASIAAALAPAGGVSELEGS LQQMMELVRAQESARKSRRQEEDLRNDLAKLKE  
RTAATRDKLLYQEDHLKLOGETLAKLESQKAKSEG DVETLTLGLHKLQDQENQYLQEA IKHLMQOQVEAKHGG  
SLDGWAGESCEAQVAREVARYVAEIEQWK RQTEQVRLRQKTEGVTROYQEHEVTVQTLNQRIDKLOKEI IQC  
DRCAKSWEEEEKSRRTNSAPTSPTVLPGLVIFQRPLPSHHERKALLIGVNYSN SHAPLKGCINDVWNMQCL  
LRYTLRYTPEQLQLLDVGDGDRSRPDRAPTKANILAGLQWLI EDVRPGDHL LLLVFSGYGAQHPRTPGSNKC  
ESYLVPSDFAAADLPSDFFEVVASACKSPAQPNVIDQTAKMAAGAAPGGPEEIERQAAAAQKALGNSKASYR  
LISMLEVHDFLSQLPQRCRVSLLLDACYTILPGAGPESNSPATFRKVDRGRVEYDKLRNFMSRPRFLELPP  
LPVQHTPPHLPRSNSFLPCTLHCFSGCRLKEWCAEFPIEGSVQGA FSWAFLKALAQGHFHIGVYQFQQLVS  
NILLNLKGYFRHIDQQPVLQLSAAASPQDVVLWT

>symbA1-12 GAKY01032711

MGSVGSQICCF LRACDPEQRVEMRSLAAQVPVPTPQPLTGYAPYAGPGQLATGVAVATPIPYASAAPVVA  
CATPVEMSPVCHNGFSCTPHAESI PVTGMAVSSRSVPQTL SQAQVQLPGRRKSLLVGINYFGTEAELSGCI  
ADVCRMQPFLEQLGFPSDQCCQMVL LDAPGWPHYRRPTLANMRQAIRWLVDVRTGDALFFHYSGHGGREP  
STSGADGYVETLCPEDYDEEGMLLDTELFETLVRPLPSGCRLTCLMDCCHSGGVLNLPYLFTGTETHWDFW  
KMPLAWAWGCGAFGRNTRPPRARTKRGSLPTKLAMSVSLWARLWQSPA AVLIRRVQM VVTSKRSSSTSSRPG  
AGRC

>symbA1-13 GAKY01017080

LGVVHEVLSRSVRAMNGTGCCASSDGKPIYEALSAGPPGGRK KALLVGINYRNMGSELRGCINDTINMQEM  
LVKQYGFKLEDIRMINEDQEKSSWPFKKVIFEGMEWLYQDARSGDTLVFHYSGHGSQYSADEKAMPADCIC  
PLDLIIDRKWPDSVILDTEIHEKLYDPLPGCKAICVFDCCHSATVANLCETMVVKEGPITASKKEKLIKE  
LTRQKDNVAAEVRFYREVNSGQLDIKKKSREEMIQLLEKHAFPKRGPYGPYSDVSTLNYNLLSTSISAFF  
EDSVKAAEARLAAKEKAIKAVQSMQPGEGAEIYIGNLEQDQQTAYGKREAAKDIRLRFIPQPGMDSGDSET  
AKPKLLGAGRGYRDVLGQAKYKDHLWVFGCQDEETSEDAHVDGTFQGAFTWALIKALKSDGFREAYSKL  
LIQIKTYLEGGGFKQVPALSTTHKMYLDCGFLGEEL

>symbA1-14 GAKY01067445

MELLRCVAEICCGESPQKPRPLVQPGPGVTGAPAPPSQVALTGRRRSLLVGINYFGTQNELHGCVSDVQRM  
LPLLDKLGFP SDAESRRVLVDAPDWPQH LHPTLANMRQGI AWLTQDAQPGDSLLFHYSGHGGMRPSDGRS  
EWHETLCPVDMDAEGMLLDSELFETLVRPLPSGCRLTCILDSCHSGGVLDPFIFVGTQENLASALAGEAA



KPNATNEKCLDINNKEKKKKIKSVHYDMDEILSLKCKVYDELDTCLKCINNLTKNKKLYEQLKYYKHKLD  
KDTKTKKLYDECTSEKTSYTMKDSYISSLLCNEYKLNHILNKSNNKVSDDKHILSYNHHNNKNNNINDI  
NNIKHISKFVNKDNEKTLNINILNHNKDPNSGVFLPSDNTESVIYMNRRNRKLCDNNFNVSKHVLYKDS  
KGTDSTRTNFYDDYSMSYVKSNDVNEKKEKIKNNINISDKYFLSETDSPIGKKALMITLNYNGLLEGC  
VNDTVDMCDHLMQRFGFNDIFILLNDCNLCYRNFVTQKANKKNILSNLHNFIVNSNNGDILFFYFCGYSIKL  
IDSKFTENYNFALLPQDHSKNNYIYSNEIFNIKKLQGGKQLCIIFDTTYTSYFVPVPTSITYNKNMNTTE  
IYKYNFSSNQYKLSLKTFGKIRDRNVDSIFVENIKKPLLYEYKKEKENDTNTNDKIILVPSIFFFSPDCN  
DRNDFEFSIKNKVRGLLTYCLGKAIELLKNDFSYHDLFVAASQILIDIKKEYNLKYVKFKLSFLNEYSRDD  
IKFLSHESLFLKLLQLDEPLWPKSLKLNLNQYIQDICNMDERKMLKSSKKKCLLIFIKDIKFYTYKNID  
TKNEYFVSCFIKKNVNLVRRNNTKEQRIVQDKIFFLEYITLNVTHMENANIYVELFKKKKKNYFVAR  
IFNIRNVNGKFSLSDEKKNIIIGIIDLNKICVS

>PfMC3 XP\_001348333.1 PF14\_0160  
MVYNNGLRGRKKEEKYIPMNRKSTSLKDPSTKNNNYIKTLDTYINEEDSPTKILSKGKKNKNENIKKR  
INEKDNDTDREDAASLNDVYNKVMKYNTRGTFIEKVSSSERNIEHNNNIIRKLGSKDYSKARVQTMTTN  
IGNHNALKKINPKVPSITSRTKSYTKVMNENKYNNNNNSNNNNINSMYYSKLLNNKYSTEHTQSIDNN  
NITSKRLNNKKTATDKAQSTSRYSISNSVKKSYSTKGYNTDRSQTMSRYTLQNKKDSNTNTNRKGYSTHRG  
QIIQDNSINNOAEEKKRNMMLKKKYIKESSNSTITGSNEKKNSSNILKKNSTCDLNYLNKEYNNNNMMHE  
HAENVYNINDNEGCSMQIINDEDVQKNVPEFYTINLGSSETKNMGENYIFKNRDKKIKPNIYERNMMDLM  
EHKLNDDMSYNFADHIKIDIECYINQLNESNKCNIYKECDPSKLI SPVYDNVNDNILENNQQLNEYEKHNDI  
LTTSYLKYYSHTNNNNHYNDEEDVHLDLGKTNEGFSNVVKNMMDNIPWNETNKKESFSNIKKKIDHTDDRHI  
AYVDNSSMKHTMNDKQYVKNVPYNNMEEVLLLNEKRGNILGSLISKNHDAKRATSNNNNINNNKYYYYD  
NKYSEHGSDSVSSNIGYPHGYKNNNIYNYVNNIKDLSSPLYCNTKTKRAHKFHTDNIMSDQLNKYEDNNKN  
DGKFFSGNISSKQKGNLNTNYTTHSSEYRIKIESNLTKDYRKSLEYNDIPNFDYINNTNVQNSDFGD  
SHYINRNVSYKNSMNSDDIQNSNNNNNNNNNNNNMNVNPNNEYLVYTNKHYVRINNKLYEKTRDNTYIEVD  
SNSNFDIINDINSSHNSPLDNKDNLTLYHNTNKKEYSDYVSSYSNINKYEDINLPNNIHVSKDGKYLKKNY  
SVSQNSDDNSVQDSFFSRTSRSNSQNRDKNVNHIEQNYNNSNRDDIYYYHNLKLLERLTQQNIKS  
GKYQRNIPQNDNDHNDDESEIKEVKKDKTKIDMNKHLHLNDKKIFNQVKRENTGVHMNASKTIKNNMKEVT  
YRNINNDTNYNNNNVKNYLYSDELGKNKNRDTPKTKQHGDSDLNKTELKKKIYNDIINNDIINNININ  
DIKSGAINNNIVNNNLINNYNADNRNVSNSIFTQHINNINNNFYNSDDERINIIDNNKRMDMTKDESDF  
RNNYFVELEKRRKKNLGTNTTPIISLKNETINMMINKRNFNNYISDKVRDKILKREISCSVNTVCSSK  
TNNKTNNSYSSNNNDNNNNNNNSNPFILDNSIRKSNIITTSNNAKLINNTIISKGINNINLINSNKN  
SLNSAKINALGLSSRNDLNYIMNNRNTSNNHINQHLLYNNRNYSVIKIPNVHKEKRSKIPHNINIKSNL  
NLEPNIKTYTNIKTPINIKAYTNIKAPTNIKAPINIKASTNIKAPTNVKAPTNVKAPTNVKAPTNVNAPT  
VNAPTANAPTYVNTPTNIKRQEFNSVTLNYKGISKFDINEDKNTTIIPPLHRQSNSNFPFKNTKLNLS  
MYTEKELIKCKSINNSDIYNYLRNTYNTKPSKFYRTVSYRNMMLKKNKSMLENRKRKTEKKEENLMSTFNY  
TSEVDSKYIVKAVVVGCVNYVSEERSRLYGSVNDAYVFCRALVKYFDFLLENILLTDSLPSNAYIYEDFD  
INRKKYINVDEEENIKNNEPLKKNIFNLFNTALYTTLKKTNEEELNCNSCKDVEIKNVDISSEKMNFL  
WPTRVNILKAVNWLVRDSIPFGSYVYFAGKSVQVDNMSGWEGEGYDEAFLCSDPFNKISEHNVITAVQLK  
DLLLSINESAQMTIILDCSGGQTILDPAGTENSLSYIKGCKQKGIWPIITNPTNKVHKAIDITILNNTSMK  
KYFCRSRYSKLIIEVESTSAMIDPLLQSISSLPVAPKAYCLCAATWEQISIEGLFPPIEFARVSQKPKPEY  
KTGEGHYQNMNKNIRAEKSNRNGPNGLINKNNNLKSKTNYEKNFNFTLNMMKMLFSNTNNNNENKLEDEK  
INRLGFNENDSDYIDDNYNSDDNNNNNNYNYDGEKGFKNFQENLNNVGQKDVIKNKKFKDNYILVSHGVF  
TYCLIEAIEFKEKELKYNILEKKNEQFIPMTLKNLINVIQKMQNIKYNKLLKINQKPEFTIHPGANATN  
NNYFVHYSKNIHFQNYKCNFINADLSPFLNVNKAWEIEINRTTLRNRKSLSLSSSTLINTASSKYFTQKNEQF  
KNSYSLKY

>GtMC1 jgi|Guith1|57223|gw1.16.206.1  
GRKKALLIGINYAGTRNALRGCINDVENMQQLLRKEGFRREEMVILTDDGRGDAMPTRNEILRACQWL  
VAGAGLGDVLFHFGHGSQQRDDSGMESDGYNETIVPCDMQQIVDDELWNNLVFPLPSGVRLTAVMDCCHSGT  
GLDLPTWKHNRWLEDENPSHSCGDVQLFSGCQDDQTSDDGDEKFKIGGAMTNAFIRAYNAQPFQTYPEF  
LSRLKSNLRSAGFGQVPLSSQAFDVNEKVFSLVEGIVPNTNVTIGRLQRRKIRPK

>GtMC2  
jgi|Guith1|156638|fgenes2\_kg.347\_#\_2\_#\_2724\_1\_CCFI\_CCFN\_EXT\_A\_EXTB  
MDCFGCCPKELQAEAEKVATNEAQNAVSNATRAAPNMQNTMGAGGNSALSQALNAVGGMQGLMGMVQSLA  
SGQTPSLPSTSNATDFKQAAQALPAEVHMFSGCRDEQTSADVDTSSFGLPADSGPGGAGGACTNSIMLA

LSENPNPTWIDLLNRMRTILKEKGFTQVPQLSSSKEISLDGNFQLAAASSSTKALLIGINYVGQKGELRGC  
HNDVLMQKDYILKNGYDPASMRVLMDDGSNMNPNTRANILDSIKWLVKDAKSGDCLFMHYSGHGGSMKDDNG  
DEADGMDTVPVVDYTTSTGQIRDDIIFQELVAPLPQGVKLTVMIMDCCHSGTILDLFSSFTANDQNTQNYTS  
GMTLPMNGNFNWKKIFDIGMSMLKKYGMGGAMGGAQSGMSANV

>GtMC3 jgi|Guith1|101222|au.6\_g2324  
MKAEARKSDQAVLFDVDTACDDDKHAQKEAIHMIELVLKEETFTDTFSKRNSALSDQSKFRSCKFVDSLTLQ  
SFESDLIFLEHPRVFGGLCMGLNEYKGELKPLETAVQDARELHDKLCSLPQSHSVLSLNPRSPSEMRKYLRK  
NLKQLMPASPELVIFFYAGHGFYEPRKKDQMLVPVDVEEVKGLSTHEINDQMLS IKDLFKIFRDFENDISL  
FHPMVLVIIDACREKIEGVTEELPQDQEDKKLPQNWSLLTTCGKGVASDNSIFFKALLDPREGMFACNRP  
LEGLVQSCCRTCKGRQPCISMNTYTIPEDFCLVRDGEALRDIKMSIAGLNKAAKEIASSQLSDTDTSETET  
FVLAYSPEDAKFRDRTKDALKYFLSQSKQRADNPRWRICSIIVLMYFLQYEDTRFCTRRLLGIFYTYMEDL  
IAGPELVNDVLEYISRNKILSPSFGAWKKSQTNRISDDKLLIAIIDYTVAKELRRVISDTEELNDALELW  
KKAIDPCFDSSKSWEDGMDRIERHLQKQAALECGQNLLFFYFVLEKAVAVNSYVMILKMTRLSSVFLRHCL  
LEYNNKKEGEGINKLEGWRTWVSSTGWIVRRDGYRADWNHCKERWCEDMRKGFQOLEKFERPRGFQRFQDF  
QKDGSVVSFAFMENGCDSNKRRLGIEYPSSTSVRGELCESPVSGPSRQEGSDGRGDQEDISILQFHMQY  
ARRYDVKDFLMDRDFWSGLKWYSQDIDCYYYFRIVHTLAHFVYDNQVDIAVDTENPNEEIDSTFAHPPPSY  
RAYRPAISDSPFLFGAKDLEDDDFWANINQLIEDEIFEEHHRQMVLIQAKYVDFHKVDLYVSMNDNSVDS  
DDSDEFVDIPKSNSQSQF

>GtMC4 jgi|Guith1|102616|au.10\_g3718  
MPRQHPRIHALCIGAGEYQYIDKLDAPKDARAMHRKFEETPLCKCFLNVDPTSKEEDMQKQLQELAESSYGR  
PPQVTFIFYAGHGCLTSGPLAMLPCNFKAEEETMMEEGTFTLDELIDILYESHWSWNKIPVVFVMDACR  
ESIQQHSLALEAAEPRRPARTSIFCSCSRGQLASDESSFFQDLLDPEHGIFAINQPLFDGLMFALDQSRAR  
VTEQWARSISPEDVPPKFCIKEDKTAKADVDQIEAAGRRIETSQQRTSPDAATVAAYS PRASEKIEHLQS  
SLVQVCKGALNSFAAGTSPGKAMFVFLSLFLRYEETEFGESWLI PCLHGLLSQGVKEVSEMINSHLMKNTI  
TSSSLKQWIAEKCPGIDQSKLVFAALDFSVRTELQRCSDNDNPDMARRESEGWVTNVANVCYTDAITVNVAM  
DMANEYLSRLAALLSIQVFERIVETGSYVVFMRMSPLTSACLSQLAEQVRKRLHGETGADQVFRTWISS  
SGWLSSTSEHRELRLQYLDDEDEEKHLMEILRGVQQLHFVLDLTRVEGQGALSLLKKQDATSSSPPLVNLIEL  
VLKGDETS KHSRFRWGVAAI WTHAQERGT SVEAVI MRLNERGICLDMFDNTCLVRENELKEQLESSERAAS  
ILRMWWARPEEIKQGGDWLRERQQRSEGAQVGRDLEEIFKAGMDVSRLVMRRRKREIRDERDSQEMKMNK  
MCQVNLWVAGEKQQAALRDQPQSADVTAICSFSGSFDSPRVIEGMQESVLTYS SPSKTSLLLRLVMLREVL  
ALGFPPDLSELWAELERLQLAAGKELDFVGMCGNILYDVIVKSSQDARAWIQRNIFGMTAEELTSALRHHA  
SNNSKHELLSGCFLSVNLTHFWLRKNLILDSITQLEDALEVFLFKFEDQTNRKRAVEEYLKILVVLDA  
LSSLRSIETELLHQESC VVVLKMPAVFGKMLLYLMENDCEINGSLNQQRLDRIVSDWLTPTHKLVSVREW  
FAALSSSLPNVGDVSSRCERGRQGLKEQLGNMNTAVADQVMVGMIREGLGLLQEQDEVFTILRMFILDEQK  
LDERQHEKCVMIKSSTSRRPRIATRGMRSAPAAPASSDKEWALLTLGELHDFCGSSSYVLQVIVEESDDDE  
TETRRLQAVEVGETYRRYRVTRDFVVS VSLVNFSSDVLQTFYKSDGEAEDEGPITLKPWAHTSLENLQ  
TKLDEGQERDTIILEDRRQATTLLRFFEA

>GtMC5 jgi|Guith1|111492|au.52\_g12594  
MQDYHLKRFSA LVEPFFNAHGWTSSV GAGPEPLVVR LTRGVQDKYIRLVSIIDLEEVGGGRQGGGGGGDP  
LLQRLLCFQDDLWPDDQLYLELKTSETWRDRSREDVIHGRARNVVAAI PRAIEKRESSLSATS DAAILFDG  
AQASQQLMIRAVLDDNRERLLKRNALSSQTGYPYQSSGSFYESEMVLEHARVFGGLCMGLSEYDGEFQ  
PLAAA EK DAMKLHQ T L C S F K N C H S A L C S N P R T L E D M K G F L R S N L T S L E E A C P E Q V L F F F A G H A I F E P T C K D  
Q L L V P T A L E A V R S L S T Q L L E S M L S I T E L F R Q F R D F E R N V A L G T P R V L V I V D A C R E K V E C K K E N L R A E S D F  
QGMPTFWTLVQTC SNGQVAFDDSAFFQAF LDPCEGMFACNQSLQRALLQCCSSTNTNPKCVLTNVQNIPE  
DFCVISDGKDLRVVMSSV IETQKAARYVTSN ASWRTDASGADTCVLA YSAQDSV LIRQRASQALKH FVSKK  
EQDIPRWSFC SMVIMLFLQYDDTRFSSKTMLGHLLAKVKNGNVGPELCEDIQEYLRHGRI TSPSFEAWKEQ  
SGLNFQDNKLLIAILDFTVTKEIRKVPDPQEQRDALLIWEIRVVKCYKSSSTSWEKGMDLIEEHLRHVTVI  
DDGEDNLFYCQVLEKAADAGSFAMILKMTKLSVFLSCCLLEYNMQHNVSEL DGLSAVVSSTGWIVREDGY  
NTDWTVSNALWSNELTRTFQTLERCEVGMGRSDQTS LQDQDPHNQEQRARTNSSAFYQSPSRQNNVDRLDE  
ITIDEMAARTQTKADGSTTPKVI

>GtMC6 jgi|Guith1|116566|au.97\_g17668  
MEGYVQKRFHSL LKTFSDLQAWSSSPVSQTERLLDKLYAGMQRKTTRLISIIDLEGQDSL LERLLCFREEE  
RPDDELCLHVMTSESWGARSKDEAVS GRATGGS LTRARMKAIERRRGRGSDSSTRQETRKADQAVLLGEGG

GGDDEGARELVRRVMELALEGGRADSFSSRRNRSVEVSLPELARGQSDGAELRGRDLPLGASSVYGLCMGLN  
DYQGELKPLARAVAAATELHEKLCSLPQCHSVLSSNP TLSAMKRYLRRLRELEGACPELVIFFYAGHGIY  
ESRSKDQMLIPTDVEEVVRLSFRMGGEMMLSMEEVFKFFRDFEQDVSQYHPRVLLVVIDACRDEIEGVSEGL  
PQDPEVKALPKHWTLLLTTCGKGKTASDESKLFESLLDAETGMFACNRPLDSVLLDCARRCKESQPCVLMNI  
YDIPEGFCLVSDGEALRDIRSSTAALHAAKDVVSSYPPLTDTSKADTYVLAYSPEDAKSFDRAMEAVKYF  
LGEQRAG

>GtMC8 jgi|Guith1|117476|au.111\_g18578  
MRGTRHVKALCIGADAYTHIAPLVEAVKDARRIHRELEDSPGCSSSFLANPTTRQSMLDMLSSLAMDCQTK  
RPELMLVIFYAGHAIQLSSGEIAMLTCDVVRPEVSEETRGSRVTVGDALSAMAAGAENVEGLPPLLVIIDAC  
RDEAQGRERIESEIERNRTRSMKVSLFSLCSRGQRADDESAFLRDLLDKEHGMFARNMRLKQAIIEHAMLES  
RREQVAVSFCTVFIPEGLCIRPDPTVPRDIQQIQGARRVAESSRRLDPTAGPTSPGPAAEVVAGYSPAA  
AGTGADAFRSSLGLLQESLGSLLLEESPRWRVCSMFVFLVFLRYEGTRYGTQATRYYQTRSKKRLGPD LIR  
AVNGHMSRNEIRSEELEQWVQETYETSTRGKTAVAAIDFAVREEIRRSLSHMPEEARSELRLWEEDVRLRD  
FYEGDMTEEEALDEAEYLRDKMTADQDGRSLPLLAVHVLVSRVETGFSVFTFLKMTRLSCACLSVALAKRV  
RATLDEESVGGDEVGFFVVLKTLGEGGALTVLGREQEVDSHVSEELKLLSSRPPAASEFTMMSLGGKRLGDP  
DDIRSDDAQSVAGSDALSQASTALHSDSRSSDARSVAGSEALSQASTASVSSASSREGQQRFLSVLLDKP  
ELSEALKPFDNILPGDTWEDVRGKVKYEDVVKVKGKALMKEAELIAGDFKTLMRSKEVEKLLSESRPTDVK  
DFERKINAKWGPDKQDGPYKIWAKIRTRRELYLNEFSSTEKRQKHLIVAMAYLSTFNWCLTSKPGKPFY  
ALPSDQKAL

>GtMC9 jgi|Guith1|117482|au.111\_g18584  
MRGTGRVKALCIGADAYTHIAPLVEAVKDARRMHRELEDSGSCSSSFLANPTTRQSMLDMLSSLAMDCQTK  
RPELMLVIFYAGHAIQLSSGEIAMLTCDVVRPEVSEETRGSRVTVGDVLSAMAAGAENVEALPPLIIVIIDAC  
RDEVQGRERIESEITNRTRSMKVSLFSLCSRGQRADDESAFLRDLLDKEDEGMFARNMRLKQAIQHAMLES  
RREQVAVSFCTELIPELDCIRPEPTVLRDIQQIQGARRVAESSRRLDPTAGPTSPGPAAEVVAGYSPAA  
AGTGADAFRSSLGLLQESLGSLLLEESPRWRVCSMFVFLVFLRYEGTRYGTQVTRYYQTRSKKRLGPD LIR  
AVNGHMSRNEIRSEELEQWVQETYGTSTRSKTAVAAIDFAVREEIRRSLSHMPEEARSELRLWEEDVRLRD  
FYEGDMTEEEAALNEAEGYLKKNKMTADQDGRSLPLLAVHVLVSRVETGFSVFTFLKMTRLSCACLSVALAKRV  
RVAGQGYHEHGELEERLEKEEAEQLRALLAGVGGDEEGFVAMSKLEGGGALTVMGREQEVDSQVGEELKLL  
SVVPVREIKTASRLRVHQVMRSESALSQASTASVS SAFARERHQIRILSALLDKPELSDALEPFDNISPGD  
TWENVRGKVKYEDVVRVKGKALMKEAELIAGDFKTLMRSKQVEKLLGTSVERPTDVKDFERKINARWGPDI  
ERGPYKIWAKISNRPECFLSRLERYLNEFLSTEERQADLIVAMAYLSTFNWCLTSKPGKPIEYALPSDQKA  
S

>GtMC10 jgi|Guith1|146838|fgenesh2\_pg.136\_#\_4  
MGENACRIKTLICIGIDAYKHIP TLDNAIRDATDVHNQLESSPGCQANLLVNPSTRTAITSQISSLVDRKRT  
RGLELILVFFAGHGMQLSKGDIALLTSDIVRAEESRETQSMITVADMLEALRDGAAQNSDRI PPLLVIID  
ACRDSKRSAMWGMERLEHEGSNLTQRMVSLCLSCSRGQQASDES AFLKDLLDSELGMFAQNRRLKLAIEY  
AVRMSYDREQKYGQYARTLCTELIPDKLCIRNDKTVAADLQQITMGVESLIQSEGMQPDSTDSGVQVVA  
YSPAATRTGADVRESLLQLVRKSLFSLQDKGPRWKICSMFLLVFLSNKGTTYKKQGDGRGFFHAFKLLG  
PELIKKVEKAMVADEIWSEKLERWIREEYGEIDRKKMVTAAIDFTVREEIRSSLGHMEEEADTEISWWEGE  
VCLADHYSKGEKEQEEALDLAEYLLKDKITADQEGGLSPLLAVHVLTRVVETGSCVAFLKMTRLSSACMSV  
MLAKSVREVLGGNGKEGLFRTWISSGWLSPREYGEEMEERMEAKEVEMLR TLLLTVGGGVSKFIDWKLE  
QPDRKSLEDSKPNITMEKVDPVKKVTYREEKVPKTSKLLSADSAGVQETQLAGYFQSLPADLATGR LERN  
LDSSREALFANIHFDTFVYLARSMLSVKMEIEESFDGAGIGISVGV DGETSIWMEKICQDLKVDLKRLEAH  
ECAFYSDQSLEHQSMMDIWFPPQLVTALQKRLTEKEIDVLDCLDEAKESENKALRRELLEGA IMAHAL  
GMNQKEKNDLIGLALRMGKEQVYRCMTKSTQRTERTWTQSLNADGSRFVEVFGSEGEPSVPADSKS  
SRIQMIRINEGQELEDRITIGFLIIMRQTADIELLGKELNLLSEAEQRQEVSDRPCRIELQGAGDCKGHKSK  
IEIIQQDLEQLTPAEFEKRVKEAFESEEFKPCRVRGIERIVKIEILDDGFGGKTFDRQDTGYFQAI SER  
YNKQRSNQDPELGLQLVIKMRVEASVLPSSDILETLRPLDASEIETDARALGRVFPEQKAVAGRILNRLK  
FVLQEEKMSLRDFEKLDFAILVFNFLTLKQQT EARMLETFLSDMTSDREC NKVVAHQAPAAEQLRKKILSI  
SDKTLFVLI SDESHWALNKGSPQDLI INDPNLVKKKNFIVLQVSATPYPNLTLHSRIPEKYVKFEEDDPYK  
PVQEAKEKRRVKGKDFEELHVIKWLRSRRYRTIYFRFEDFLRTLPSYVLD ECI LPGEEASADDQARE DVRNQ  
LIRRENNLISLME SVKVSRRKKKEEEEAVREHVWLADFILSMLYFHKVRWDRSTGRLKSVADDLHNITLKD  
LEKLLKEEYMTIANQCKSSGARQACAKLRERVKETLKEERSGSAARDCAIEVFYIKLKSEAKEESVEVND  
DDSFMEADDFYQFNETDRIVKDLLSNRTHNGGLYGHMKVVRMFSIKLADQVCEELKRIRKSLFGDSVFAVI

EDYGGSELYDCIETQFRDQPLTYDKDKAPRSINSLIQGRARGKCLTSLNYKDLEGLPCILFLIEKGRMGDT  
FPHSFDCLDLRVRSSDNNTTTLIQEMGRLCRYPTLREEHRFETSEEAVQVAKEKRWFEGKGRPIVVYANAAD  
DEVDLSQLDGLKRLIGIAWSLSSWTQKSILOVVERGKTLSPGRRGEEDWYTLDRNVDRSAQASMAEDLKG  
MLIRFPASTMNRRAVPGWDVQCLKITESRRKDETKIRVQDISQVKKYNNFGPDSTYIIVRDSASLAWLAS  
RHSCPHGGVLEKELEHDLPSALVSSSLYDTLMKAVETAIEYCSKEIWEICIRLSPQLHMHMKRDRGQGLV  
QKNLDLHDIRNRHVAVTRAKAEGEGSKRVKVNHCDCDHTKRRQHQLRFLHAECQIGKTGAYLHLLNLLR  
REVGLRADSEYACIPQIRPEDYPIKVEFQTRLAWEMPFWRDLAGQKGLFKMKEGKYHKMVIQRLRLLAK  
CLRDSRGRSSWQQLYCNGLLAPASSQNAEGECIQVKEKVIIRLLKVKSKSNSSPIEIISEGAEVKLKILDFE  
RLRDIVEWDREDSMPSIVADMRTGLKTRSGETLLQSNQDKSELSSALGSKTDLQNIWEGRETTAGTSS  
GLATGQVKNDFPARCLCLHTLPEKTKVLLRSLPIMRGVRIARLFGDDERRWPRI SFPFGEEQVSRYSFLR  
DGRVNGAFELQGEKAIIRNWMTASYKRDAAGSIQTGRAAFLLDRSSAFKEGDRDVPVRQMLLVRPDDGEGDG  
QFSSYVSEVGSEYIVVALSHEMILSEAVSELGFRSEQFEHQMPDDGKLRLTPQDGGIGYARLFAQLFAHLL  
GLERVWMIIDNVLDCYQLDL SKMFASDPPLLHPPACSFATIMLQMQDMI SDAPKSSEEICRHHRKQGKGQ  
ACPKTEGFFDHESMTTKSCQAVRGA AAAKAAAMERGVKSTPDI STIQDVRGNTDGYAVIGMRRDVNVFMKS  
SVPFKITHSVY SFFLLNVKSTIGKGVLFPPKQWEDVDFNNLCEEAGLAVLKVNRFFHKKQHRSLHDLRLEV  
DGQPEACEVVRVHVNGRQIFNVACGSEMSTLSDVYETIVKRLKRLYPQSDIKKVTCTRIQGGDISFAYKES  
YRDIKELEGQEMCEAVYLDVLFVPEARERMVDEAIVTTSTSKASIPFLVSLVESQRNIFYYPPEYEMDES  
EGDQPFPAEVPAGRWNEFSDTNLRNVKLKEINVMWDDVEEYKRRFFNIVRNLLRDKCEIRKINLILPAKAY  
ETMKEKIDDKIKNLRIGKMTKTWTTVLPCKEASQEDDVMIEASQSDNAESTMDFVVICCSSEEEKKAAQ  
DKGEGQRAEADEAKQOEAKQOEAKRQOEAKQOEAKRQOEAKRQOEAKRQOEAKRQOEAKRQOEAKRQOEAKRQ  
KAAEKQDGLWRTEKWKRRKFQEGTVRVGDNISYRPAKQEAERGKVIIEGGKIEEKGRTFADVLEFFRSGGDEA  
PVAKLRSVYINRDGKNIISVHDLKQEKD

>GtMC11\_jgi|Guith1|146844|fgenes2\_pg.136\_#\_10

MGENTCRICKTLCIGIDAYEHI STLDNAIRDATDVHNQLESSPGCQATLLVNPSTRTAITSQISSLVDRKRT  
RGLELILVFFAGHGMQLSKGDIALLTSDIVRAEESEETKQSMITVADMLEALRDGAAQNSDRI PPLLVIID  
ACRNSKRSAWMGMERLEHEGSSLIQRMVSLCLSCSRGQQASDESFALEDLLDSEQGMFAQNRRLKLAIEY  
AVRMSYDREQKYGQYARTLCTELIPDKLCLRNKTVAADLQQIRMGVESLIQSEGMQPDSTDSGVQVVAA  
YSPAARTRGADVRESLQLVKSLFSLQDKGPRWKICSMFLLVFLSNKGTTYKKQGDGRRGFHAFKQMVG  
PELIAKTVGKAMVADEIWEKLERWIRERYGEIDRKKMVTAAIDFTVREEIRSSLRHMEEEANAIEIKWVTRN  
DYLADHYSKGEQEEALDLAEYLLKDKITADQEGRLSPLLAVHVL SRVVETGSCVAFMKMTRLSSACMSV  
MLAKSVREVLGGNGKEGLFRTWISSSGWLSGPREYGEEMEERMEAKEVEMLRLLLLTVGGVSKFIDWKKLE  
QPDRKSLEDKPNIKMEKVDVPVKVYTYREEKVPKTSKLLSADSAGVQETPLAGSMLSVMKIEEESFDGAG  
IGITVGVDEETSIMWKICQDLKIDLKRLAHECAFYSLSLEHQSMMTDISFFPQLVTALQKRLTKNKEI  
NVLGCINKAKESENNDSSQKRELLEGAAMMARALGMNQREKNDLISQKLP SRGKEQIYDCMTKSTQKQTERW  
TWQSLNADGSRFRFVEVFGSEGEGPSVPADSKPSRIQIMIRINEGORLEDRTIGFLIIMRQTADIELLEKEL  
NLLSEAEQRQEVSDRPCRIELQGAGGCKGHKSAIEIIQDLEQLTPEEFKRVKEAFESEEFKPCRVRGI  
ERIVKIEILDDGFGGRKTFDRQDTGYFQAI SERYNKQRSNQDPELGLQLVIKMRVEASVLPSSDVLETLR  
PLDASEIETDARALGRVFPEQKAVAGRILNRLKFVLQEEKMSLRDFEKLDFAILVFNFLTLKQQTTEAMLE  
TLFSDMTSDRECNKVVHQA PAAEQLRKKILSISDKTLFVLI SDESHWALNKGSPQDLIINDPNLMEKKNF  
IVLQVSATPYPNLTLSHRIPEKYVKFEEDDPYKPVQEAKEQKTGEFDEELHVIKWKLRSSRYRTIYFRFED  
FLRTLPSYVLDECILPGEEASADDQTREDVRNQLIRRENNLISTLMESVKVSRKKKEEEEAVREHVWLADF  
ILSMLYFHKVWRDRSTGRLKSVADDLHNITLKDLEKLEEEYMTIANKCKSSGARQACAKLRERVKETLK  
EERSGSAARDCIAEVFYIKLKSEAKEESVEVNDSDSFMEADDFQFNETDRIVKDLLSQRKHNGGLYGHMK  
VVMGFSIKLADEVCEELKRIRKSLFGDSVFAVIEDYGGSELYDCIETQFRDEPLTYDKDKAPRSINSLIQG  
RARGKCLTSLNYKDLEGLPCILVFLIEKGRMGDTFPHSFDCLDLRVRSSDNNTTTLIQEMGRLCRYPTLREEH  
CFETSEEAVQVAKEKRWFEGKGRPIVVYANAADDEVDLSQLDGLKRLIGIAWSLSSWTQKSILOVVERGK  
LSPGRRGEEDWYTLDRNVDRSAQASMAEDLKGCMILRFPSTFKIGGSPSWGDVQCLKITESRRQVDETKI  
RVQDSSQVKKCPDSTYIIVRDSASLAWLASRHNCPHGGVLEKELEHDLPSALVSSSLYDTLMKAVETAIEYCS  
KEIWEICIRLSPQLHMHMKRDRGQGLVSIYQKNELHDIRNQHVAVTRAKAEGEGSKRVKVNHCDCDHTK  
RRQHQLRFLHAECQIGKTGAYLHLLNFLRREVGLRADSEYACIPQIRPEDYPIKVEFQTRLAWEMPFWRD  
LAGQKGLFKMKEGKYHKMVIQRLRLLAKCLRDSRGRSSWQQLYCKALLAPASSQNAEGECIQVKEKVI  
RLLKVKVSDSSPIEIISEGAEVKLRILDVERLRDIVEWDREDSMPSIVADMMKAGLKTRSGETLLQSNQDK  
SELSSALGSKTDLQNIWEGRETTAGTSQGLATGQVKNDFPARCLCLHTLPEKTKVLLRSLPMMRGVRI  
ARLFGDDERRWPRI SFPFGEEQVSRYSFLKDGRVNGAFELQGEKAIIRNWMTASYKRDAAGSIQTGRAAF  
DRSSAFKEGDRDVPVRQMLLVRPDDSEGQGFSSYVSEVGSEYIVVALSHEMILSEAVSELGFRFEQFERQ  
MPDDGKLRLTPQDGGIGYARLFAQLFAHLLGLERVWMIIDNVLDCYQLDL SKMFASDPPLLHPPVACSFAT

IMLQMQDMISDAPKSSEEICRQHKKQGGKQACPKTDGFFDHESMI PKSCQAVRGAAAKAAAMERGVKSTS  
DISTIQDVRGNTDGYAVIGMRRD VNVFMNSSVPFKITHSVYSFFLLNVKSTIGKGVLFPPKKVWEDVDFNN  
LCEEAGLAVLVKVNRFHHKQHRSLHDRLEVDDQPEACEVVCRVHVNGRQIFNVACGSDMSTLSDVYETIVK  
RLKRLYPQSDIKKVT CRIQGGDISFAYKESYRDIKELEGQEMCEAVYLDVLF PYEARERMQVDEAIVTTST  
SKASIPFLVSLVESQRNIFYFPSRRALDESEGDQFFAEVPAGRKWNELSDKSLDRVKLEELNIMWDDVEA  
FKPFFNIVRNLLRDKECIRKINLILPAKAYESMKEKIDDKIKNLRIGNMKTWTTVLPCKEDASQEDD VDM  
IEASQSDNAESTMDFVVICCSSEEEKKAAQDKGEGLRAEAEDEAKQQEAEDEAKQQEAKQQEAKPQAEESD  
SSKKPKTEEPEKRKSSEPPVGESPAKKGKAAEKQGLWRIEKWKRFQEGAVRVGDNISYRPAKQEAAREGK  
VIEGGKIEEKGKT FADVLEFFRSVDDGDASGSAPGQKLR SVYINRDGKNFISVHDLKQEKD

>GtMC12 jgi|Guith1|163584|estExt\_fgenesh2\_pg.C\_400124  
MSHAGVTLTSLVIDFRYRDEGNQVQDRGLGPFLEMYAFRVGNLRLERYSLHVHTLKKWSEREQHVWDRARR  
ITAVNIRRCARRDETGYFKDVELYGLPVLPCSPHLRRHWRNYLDRSQDLEWDCTKLRVYHTETESKQETIR  
NVRGGLKQKEEEEFDLVLQERLEVFALCIGVGGYEMLPPLPQALRDSHDFLHALRRMPCRGRVEISDPTEN  
DLLYLLEKHLEVI AKFPSSWILVTFSGHVLKEGKSGELCFLKDFDASWLDRLDEEPEGAVTLGDIVKLWT  
KWFEPHPPVLLLLVDGCRMTMPDQPQLHAVDLPTGWSMCMSSRRTERGETIQEASYMHSMMMMDQENGMFAGG  
ERLRGVLTRIRDQAPAGIAVEESWKEDPRLPEMFSFSDIIEFPAAVLQDNDGDIREEEEQETGAGAGAGAG  
AGAGAGAGAGAGAGAGAGAGAGAGAGAGAGAGAGAGAGAGAGAGAGAGAGAGAGAGAGAGAGAGAGAGAG  
NLLDAAGELCVEVGRSDDAVKLFRRSIELRPEENSCKYMNGLQLMAGAESLELFLKGLALMRQELGNVAEE  
KGEEAKKLRGLCSAHC SVAELYMTDLCEENAEAGILKLLIELEQLDEAEFGNLLLQVDDQYVETWYLL  
ALIHFRGAHSAHHCTLSAIKILEQEGVEDEDQASRLQELHEEIEKNLRDGNNDVAMEDEEGDEDGDWMT  
DDEEEAHP

>GtMC13 jgi|Guith1|144452|fgenesh2\_pg.87\_#\_38  
MEAAEEEEAEVRAIAKLLLEVYCKGSNGKYDAYTDKKLVDTCQRELGEEMVETRTGGPKGRLLRAFADKLNK  
FDKFSGKTRTEALCNLAEILNKKVGPQRQPTPERQKLALIIGISNYDKEALPNCTSDARCI SEAFKSRGFE  
TYLEFDTQDQESFWKVEYEDFASKIRPPCTVLFYVAAHGAQFHTDVLVFP IIPFRTKDAEKAI SMQAMINKI  
STRLD PDS DVVMLLDTCRVNFSQRGHQDLEQLATLPQTWILYATKESYPVCDGPDGGNSPFTRAVLRTLKE  
LGPDVEFYKFATSVNKYVRDCGMQRSELKADMTKELFI

>GtMC14 jgi|Guith1|149022|fgenesh2\_pg.268\_#\_3  
MDETREGGSRWDGSHLQVQLVAIEPGVTDKRCNVRNPPAAVLLTGTFLDPCQPCVLGRLEVSYLILTS  
PSLSDLPGLALTTRCIDVCVDRRSLKSEQRGQEQLTDQDQTQEQQQLTDQEQEGRGRLEGEQDCQVDG  
EIIYEENGFTSFQVGGGDSQGEPAASRGVVRNEEGRGADEEQGEHGQGAPGEGPVSTRAAASPDRIEGTPPT  
RSRRSSGVSSSAEKSTGRAKSPATPGLSPDGGLDEIRQGLAKAELKEKEVEEVI EKMKSLGVRGKKDIKF  
VRELIDIKTLDLTEMSKLRVEKYLKRFARKKKPASPGEEESLFRSLKQFDVHLNVQSCMFSSRMAEDFP  
WNLQEEKSIEDRQRTSVNELYERLKSDDNLEVDFLYLLTVSWCLSRCDPVLGFNEFPYTCGGS LKREWR  
IEREVWFLLRATSEGVPPTYIVFHLLFAGMWRESREERDCSVVGKVRMRSSTKVRSKKHVYKCTDTTKWDS  
AGGGLDLRSSSMARWRWREGAEGEESMAKVRGWLVAEQEAPFAQAVTVGPCWNLAGTRRRRAALIVCNQAY  
RRARCFPELYNPVPDGRQLGEVLEELGWKVEFRVDLNL EELVGAVRCFRDAIGDNE SAAMLA FVGHGVEVH  
GKLFLLPTDIQLEVDNYFQREKDLAADLARC SLSF DAVQSELRGRNGTCPTL FVL DCCRSSNNSRSPIFQP  
STTVQNLELKNSCIIYSTQSGQVALEGAPDGGPFMSAFAGELRKEEAELNQLVIETRKIVMNSTGGAQMA  
PNQSLLELQFFFPCPEIAACL

## References

1. Matthijs, M. *et al.* The transcription factor bZIP14 regulates the TCA cycle in the diatom *Phaeodactylum tricornutum*. *EMBO J.* **36**, e201696392 (2017).
2. Smith, S. R. *et al.* Transcriptional orchestration of the global cellular response of a model pennate diatom to diel light cycling under iron limitation. *PLOS Genet.* **12**, e1006490 (2016).
3. Wong, A. H.-H., Yan, C. & Shi, Y. Crystal structure of the yeast metacaspase Yca1. *J. Biol. Chem.* **287**, 29251–29259 (2012).
4. Alexander, H., Jenkins, B. D., Rynearson, T. A. & Dyhrman, S. T. Metatranscriptome analyses indicate resource partitioning between diatoms in the field. *Proc. Natl. Acad. Sci.* **112**, 201421993 (2015).
5. Rosenwasser, S. *et al.* Mapping the diatom redox-sensitive proteome provides insight into response to nitrogen stress in the marine environment. *Proc. Natl. Acad. Sci. U. S. A.* **111**, 2740–5 (2014).
6. Hopes, A., Nekrasov, V., Kamoun, S. & Mock, T. Editing of the urease gene by CRISPR-Cas in the diatom *Thalassiosira pseudonana*. *Plant Methods* **12**, 49 (2016).
7. Siaut, M. *et al.* Molecular toolbox for studying diatom biology in *Phaeodactylum tricornutum*. *Gene* **406**, 23–35 (2007).
